# Supplementary material for: Direct access to thiomethyl/selenomethyl-substituted pyrazoles by combining isocyanide insertion into the inert C(sp)–S bond and intermolecular cyclization
Source: Royal Society of Chemistry journal article supplement (doi:10.1039/d4qo01519c), 2024-01-01
Supplement: d4qo01519c1.pdf [file d4qo01519c1.pdf]

*Supporting Information for*

**Direct access to thiomethyl/selenomethyl-substituted pyrazoles by combined isocyanide insertion into inert C(sp)-S bond and intermolecular cyclization**

Yan He,<sup>1+</sup> Hua Sun,<sup>1+</sup> Guo-Hui Liu,<sup>3</sup> Ying-Chun Wang,<sup>3\*</sup> and Ying-Ming Pan<sup>2,\*</sup>

<sup>1</sup> School of Materials and Chemical Engineering, Xuzhou University of Technology, Xuzhou, Jiangsu 221018, People's Republic of China

<sup>2</sup> State Key Laboratory for Chemistry and Molecular Engineering of Medicinal Resources, School of Chemistry and Pharmaceutical Sciences of Guangxi Normal University, Guilin 541004, People's Republic of China.

<sup>3</sup> College of Chemistry and Chemical Engineering, Jishou University, Jishou 416000, People's Republic of China

\*Correspondence and requests for materials should be addressed to Y.-C. Wang and Y.-M. Pan. (e-mail: panym@mailbox.gxnu.edu.cn, wangyingchunjsu@163.com)

**Table of contents**

|                                                                                                 |     |
|-------------------------------------------------------------------------------------------------|-----|
| 1. General information .....                                                                    | S2  |
| 2. Computational Details .....                                                                  | S3  |
| 3. Synthesis of the substrates .....                                                            | S3  |
| 4. General procedure for the synthesis of thiomethyl-substituted pyrazoles .....                | S3  |
| 5. Detailed procedure for the 1 mmol scale thioalkyne <b>1a</b> with isocyanide <b>2a</b> ..... | S4  |
| 6. General procedure for the synthesis of selenomethyl-substituted pyrazoles .....              | S21 |
| 7. Control experiments .....                                                                    | S25 |
| 8. Crystal data and structure refinement of product <b>3ja</b> .....                            | S29 |
| 9. Crystal data and structure refinement of <b>5a</b> .....                                     | S39 |
| 10. Crystal data and structure refinement of product alkynyl imine .....                        | S44 |
| 11. Copies of the NMR spectra .....                                                             | S49 |
| 12. References .....                                                                            | S92 |

## 1. General information

Proton nuclear magnetic resonance spectra ( $^1\text{H}$  NMR) and carbon nuclear magnetic resonance spectra ( $^{13}\text{C}$  NMR) were recorded at 400 MHz and 100 MHz, using  $\text{CDCl}_3$  as reference standard ( $\delta$  7.26 ppm) for  $^1\text{H}$  NMR and ( $\delta$  77.16 ppm) for  $^{13}\text{C}$  NMR. HRMS spectra were recorded with Agilent 6550 Q-TOF Quadrupole/Time-of-Flight Tandem mass spectrometer using ESI. Single Crystal X-ray diffraction data were collected using a Bruker D8 Quest diffractometer (Mo  $K\alpha$ ,  $\lambda = 0.71073$  Å). Melting points were uncorrected. Precoated silica gel plates GF-254 were used for thin-layer analytical chromatography. Column chromatography was performed on silica gel (200-300 mesh). Unless otherwise noted, all reagents were obtained commercially and used without further purification.

## 2. Computational Details

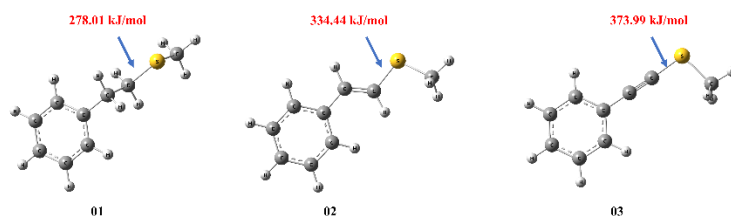

| system | E/Hartree   | Bond dissociation energies/hartree | Bond dissociation energies/ $\text{kJ}\cdot\text{mol}^{-1}$ | Bond dissociation energies/ $\text{kcal}\cdot\text{mol}^{-1}$ |
|--------|-------------|------------------------------------|-------------------------------------------------------------|---------------------------------------------------------------|
| 01M1   | -748.374319 | -                                  | -                                                           | -                                                             |
| 01M1-A | -310.199424 | -                                  | -                                                           | -                                                             |
| 01M1-B | -438.069005 | 0.10589                            | 278.01                                                      | 66.45                                                         |
| 02M2   | -747.169564 | -                                  | -                                                           | -                                                             |
| 02M2-A | -308.973172 | -                                  | -                                                           | -                                                             |
| 02M2-B | -438.06901  | 0.127382                           | 334.44                                                      | 79.93                                                         |
| 03M3   | -745.935714 | -                                  | -                                                           | -                                                             |
| 03M3-A | -307.724261 | -                                  | -                                                           | -                                                             |
| 03M3-B | -438.069006 | 0.142447                           | 373.99                                                      | 89.39                                                         |

The theoretical calculations were performed via the Gaussian 16 suite of programs<sup>1</sup>. The structures of the studied compounds (denoted by M1, M2, and M3) were fully optimized at the B3LYP-D3BJ/TZVP level of theory. The solvent effect was included in the calculations using the solvation model based on the density (SMD) model. The vibrational frequencies of the optimized structures were carried out at the same level. The structures were characterized as a local energy minimum on the potential energy surface by verifying that all the vibrational frequencies were real. The bond dissociation energies of C-S bond in three molecules were estimated at the B3LYP-D3BJ/TZVP level of theory.

### 3. Synthesis of the substrates

The thioalkynes **1a-1m** and alkynyl selenides **4a** were synthesized according to the published procedures.<sup>2,3</sup> The isocyanobenzenes **2a-2o**, were synthesized according to the published procedures.<sup>4,5</sup>

### 4. General procedure for the synthesis of thiomethyl-substituted pyrazoles

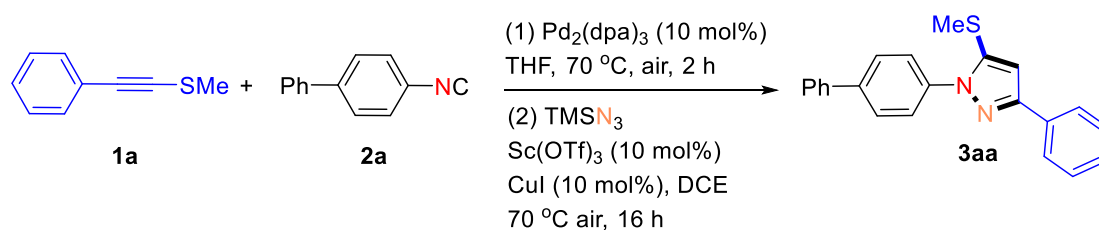

A mixture of Pd<sub>2</sub>(dpa)<sub>3</sub> (0.02 mmol, 19 mg), thioalkyne **1a** (0.2 mmol, 43 mg) and isocyanide **2a** (0.3 mmol, 54 mg) in THF (2 mL) was stirred at 70 °C (heating oil temperature) in a sealed tube under air atmosphere. After 2 h, the resulting mixture was cooled down to room temperature and then filtered to a round bottom flask by a short pad of silica gel (eluent: CH<sub>2</sub>Cl<sub>2</sub>). Volatiles were evaporated under reduced pressure. The crude products were directly used in the next reaction with without further purification.

The above crude mixture was dissolved in DCE (2 mL) and then Sc(OTf)<sub>3</sub> (0.02 mmol, 10 mg), CuI (0.02 mmol, 4 mg) and TMSN<sub>3</sub> (0.3 mmol, 35 mg) was added. The reaction mixture was stirred at 70 °C (heating mantle temperature). After 16 h, the resulting mixture is filtered by a short pad of silica gel (eluent: CH<sub>2</sub>Cl<sub>2</sub>) and

concentrated in vacuo then the crude product was purified by column chromatography using PE/EA (25:1-20:1) to provide the corresponding compounds **3aa**.

### 5. Detailed procedure for the 1 mmol scale thioalkyne **1a** with isocyanide **2a**

A mixture of Pd<sub>2</sub>(dppf)<sub>3</sub> (0.1 mmol, 95 mg), thioalkyne **1a** (1.0 mmol, 148 mg) and isocyanide **2a** (1.5 mmol, 269 mg) in THF (8 mL) was stirred at 70 °C (heating oil temperature) in a sealed tube under air atmosphere. After 2 h, the resulting mixture was cooled down to room temperature and then filtered to a round bottom flask by a short pad of silica gel (eluent: CH<sub>2</sub>Cl<sub>2</sub>). Volatiles were evaporated under reduced pressure. The crude products were directly used in the next reaction with without further purification.

The above crude mixture was dissolved in DCE (8 mL) and then Sc(OTf)<sub>3</sub> (0.1 mmol, 50 mg), CuI (0.1 mmol, 20 mg) and TMSN<sub>3</sub> (1.5 mmol, 175 mg) was added. The reaction mixture was stirred at 70 °C (heating mantle temperature). After 16 h, the resulting mixture is filtered by a short pad of silica gel (eluent: CH<sub>2</sub>Cl<sub>2</sub>) and concentrated in vacuo then the crude product was purified by column chromatography using PE/EA (25:1-20:1) to provide the corresponding compounds **3aa** (171 mg, 50%).

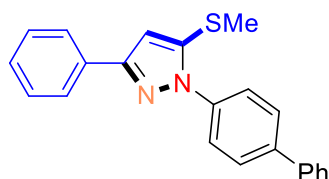

### 1-([1,1'-biphenyl]-4-yl)-5-(methylthio)-3-phenyl-1H-pyrazole (**3aa**)

The compound was prepared from 4-isocyano-1,1'-biphenyl (0.3 mmol, 54 mg) and methyl(phenylethynyl)sulfane (0.2 mmol, 30 mg) following the general procedure. purification by column chromatography (silica, PE:EA=25:1) afforded 48 mg (70%) of the title compound **3aa**.

**Physical state:** yellow liquid.

**<sup>1</sup>H NMR (400 MHz, CDCl<sub>3</sub>, 25 °C):** δ 7.91-7.87 (m, 2H), 7.77-7.71 (m, 4H), 7.67-7.63 (m, 2H), 7.50-7.34 (m, 6H), 6.70 (s, 1H), 2.48 (s, 3H).

**<sup>13</sup>C NMR (100 MHz, CDCl<sub>3</sub>, 25 °C):** δ 152.3, 140.9, 140.3, 139.2, 138.9, 132.9, 129.0, 128.8, 128.3, 127.8, 127.8, 127.3, 125.8, 125.1, 105.7, 18.3.

**HRMS (ESI) m/z:** [M+H]<sup>+</sup> Calcd for C<sub>22</sub>H<sub>19</sub>N<sub>2</sub>S<sup>+</sup> 343.1263; Found 343.1256.

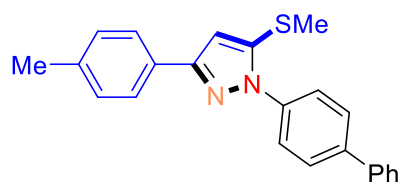

**1-([1,1'-biphenyl]-4-yl)-5-(methylthio)-3-(p-tolyl)-1H-pyrazole (3ba)**

The compound was prepared from 4-isocyano-1,1'-biphenyl (0.3 mmol, 54 mg) and methyl(*p*-tolylethynyl)sulfane (0.2 mmol, 32 mg) following the general procedure. purification by column chromatography (silica, PE:EA=25:1) afforded 51 mg (72%) of the title compound **3ba**.

**Physical state:** Brownish yellow liquid.

**<sup>1</sup>H NMR (400 MHz, CDCl<sub>3</sub>, 25 °C):** δ 7.79-7.67 (m, 6H), 7.63 (d, *J* = 7.7 Hz, 2H), 7.46 (t, *J* = 7.6 Hz, 2H), 7.40-7.34 (m, 1H), 7.24 (d, *J* = 8 Hz, 2H), 6.65 (s, 1H), 2.45 (s, 3H), 2.38 (s, 3H).

**<sup>13</sup>C NMR (100 MHz, CDCl<sub>3</sub>, 25 °C):** δ 152.4, 140.8, 140.3, 139.0, 138.9, 138.1, 130.1, 129.5, 129.0, 127.8, 127.7, 127.3, 125.7, 125.1, 105.6, 21.5, 18.3.

**HRMS (ESI) m/z:** [M+H]<sup>+</sup> Calcd for C<sub>23</sub>H<sub>21</sub>N<sub>2</sub>S<sup>+</sup> 357.1420; Found 357.1415.

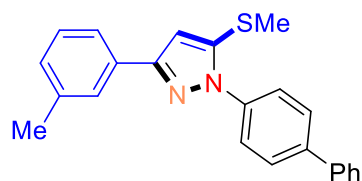

**1-([1,1'-biphenyl]-4-yl)-5-(methylthio)-3-(m-tolyl)-1H-pyrazole (3ca)**

The compound was prepared from 4-isocyano-1,1'-biphenyl (0.3 mmol, 54 mg) and methyl(*m*-tolylethynyl)sulfane (0.2 mmol, 32 mg) following the general procedure. purification by column chromatography (silica, PE:EA=25:1) afforded 51 mg (71%) of the title compound **3ca**.

**Physical state:** Brownish yellow liquid.

**<sup>1</sup>H NMR (400 MHz, CDCl<sub>3</sub>, 25 °C):** δ 7.76-7.71 (m, 5H), 7.67-7.63 (m, 3H), 7.50-7.46 (m, 2H), 7.41-7.37 (m, 1H), 7.32 (t, *J* = 7.6 Hz, 1H), 7.17 (ddt, *J* = 7.6, 1.8, 0.8 Hz, 1H), 6.69 (s, 1H), 2.47 (s, 3H), 2.42 (s, 3H).

**<sup>13</sup>C NMR (100 MHz, CDCl<sub>3</sub>, 25 °C):** δ 152.5, 140.9, 140.3, 139.1, 138.9, 138.4, 132.8, 129.1, 129.0, 128.7, 127.8, 127.8, 127.3, 126.4, 125.2, 123.0, 105.8, 21.6, 18.4.

**HRMS (ESI) m/z:** [M+H]<sup>+</sup> Calcd for C<sub>23</sub>H<sub>21</sub>N<sub>2</sub>S<sup>+</sup> 357.1420; Found 357.1417.

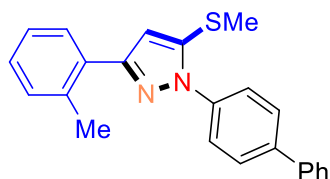

### 1-([1,1'-biphenyl]-4-yl)-5-(methylthio)-3-(*o*-tolyl)-1*H*-pyrazole (3da)

The compound was prepared from 4-isocyano-1,1'-biphenyl (0.3 mmol, 54 mg) and methyl(*o*-tolylethynyl)sulfane (0.2 mmol, 32 mg) following the general procedure. purification by column chromatography (silica, PE:EA=25:1) afforded 50 mg (70%) of the title compound **3da**.

**Physical state:** Brownish yellow liquid.

**<sup>1</sup>H NMR (400 MHz, CDCl<sub>3</sub>, 25 °C):** δ 7.80-7.76 (m, 2H), 7.74-7.70 (m, 2H), 7.67-7.63 (m, 3H), 7.48 (ddd, *J* = 7.7, 6.9, 1.2 Hz, 2H), 7.42-7.36 (m, 1H), 7.30-7.25 (m, 3H), 6.55 (s, 1H), 2.58 (s, 3H), 2.47 (s, 3H).

**<sup>13</sup>C NMR (100 MHz, CDCl<sub>3</sub>, 25 °C):** δ 152.9, 140.7, 140.3, 138.9, 138.0, 136.3, 132.7, 131.0, 129.4, 129.0, 128.1, 127.7, 127.3, 126.0, 124.9, 108.8, 21.5, 18.4.

**HRMS (ESI) m/z:** [M+H]<sup>+</sup> Calcd for C<sub>23</sub>H<sub>21</sub>N<sub>2</sub>S<sup>+</sup> 357.1420; Found 357.1416.

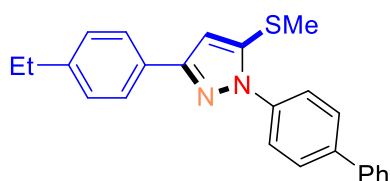

### 1-([1,1'-biphenyl]-4-yl)-3-(4-ethylphenyl)-5-(methylthio)-1*H*-pyrazole (3ea)

The compound was prepared from 4-isocyano-1,1'-biphenyl (0.3 mmol, 54 mg) and ((4-ethylphenyl)ethynyl)(methyl)sulfane (0.2 mmol, 35 mg) following the general procedure. purification by column chromatography (silica, PE:EA=25:1) afforded 55 mg (74%) of the title compound **3ea**.

**Physical state:** yellow liquid.

**<sup>1</sup>H NMR (400 MHz, CDCl<sub>3</sub>, 25 °C):** δ 7.71 (dd, *J* = 8.3, 1.8 Hz, 2H), 7.68-7.60 (m, 4H), 7.55 (dt, *J* = 8.2, 1.1 Hz, 2H), 7.41-7.36 (m, 2H), 7.32-7.27 (m, 1H), 7.20-7.16 (m, 2H), 6.58 (s, 1H), 2.60 (q, *J* = 7.6 Hz, 2H), 2.37 (s, 3H), 1.19 (t, *J* = 7.6, 3H).

**<sup>13</sup>C NMR (100 MHz, CDCl<sub>3</sub>, 25 °C):** δ 152.4, 144.4, 140.8, 140.3, 139.0, 138.9, 130.3, 129.0, 128.3, 127.8, 127.7, 127.3, 125.8, 125.1, 105.6, 28.8, 18.3, 15.7.

**HRMS (ESI) m/z:** [M+H]<sup>+</sup> Calcd for C<sub>24</sub>H<sub>23</sub>N<sub>2</sub>S<sup>+</sup> 371.1576; Found 371.1573.

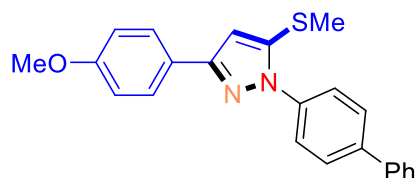

### 1-([1,1'-biphenyl]-4-yl)-3-(4-methoxyphenyl)-5-(methylthio)-1H-pyrazole (3fa)

The compound was prepared from 4-isocyano-1,1'-biphenyl (0.3 mmol, 54 mg) and ((4-methoxyphenyl)ethynyl)(methyl)sulfane (0.2 mmol, 36 mg) following the general procedure. purification by column chromatography (silica, PE:EA=25:1) afforded 57 mg (76%) of the title compound **3fa**.

**Physical state:** yellow liquid.

**<sup>1</sup>H NMR (400 MHz, CDCl<sub>3</sub>, 25 °C):** δ 7.84-7.81 (m, 2H), 7.76-7.70 (m, 4H), 7.66-7.63 (m, 2H), 7.50-7.46 (m, 2H), 7.42-7.37 (m, 1H), 6.99-6.95 (m, 2H), 6.63 (s, 1H), 3.85 (s, 3H), 2.46 (s, 3H).

**<sup>13</sup>C NMR (100 MHz, CDCl<sub>3</sub>, 25 °C):** δ 159.8, 152.2, 140.7, 140.3, 139.0, 138.9, 129.0, 127.8, 127.7, 127.3, 127.1, 125.7, 125.0, 114.2, 105.4, 55.4, 18.3.

**HRMS (ESI) m/z:** [M+H]<sup>+</sup> Calcd for C<sub>23</sub>H<sub>21</sub>N<sub>2</sub>OS<sup>+</sup> 373.1369; Found 373.1361.

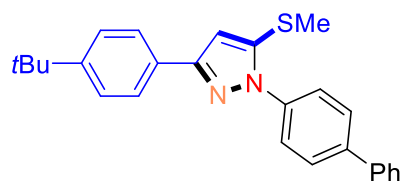

### 1-([1,1'-biphenyl]-4-yl)-3-(4-(tert-butyl)phenyl)-5-(methylthio)-1H-pyrazole (3ga)

The compound was prepared from 4-isocyano-1,1'-biphenyl (0.3 mmol, 54 mg) and ((4-(*tert*-butyl)phenyl)ethynyl)(methyl)sulfane (0.2 mmol, 41 mg) following the general procedure. purification by column chromatography (silica, PE:EA=25:1) afforded 60 mg (75%) of the title compound **3ga**.

**Physical state:** yellow liquid.

**<sup>1</sup>H NMR (400 MHz, CDCl<sub>3</sub>, 25 °C):** δ 7.83-7.80 (m, 2H), 7.77-7.71 (m, 4H), 7.66-7.64 (m, 2H), 7.49-7.45 (m, 4H), 7.41-7.37 (m, 1H), 6.68 (s, 1H), 2.47 (s, 3H), 1.37 (s, 9H).

**<sup>13</sup>C NMR (100 MHz, CDCl<sub>3</sub>, 25 °C):** δ 152.4, 151.3, 140.8, 140.4, 139.0, 138.9, 130.1, 129.0, 127.8, 127.7, 127.3, 125.7, 125.6, 125.1, 105.7, 34.8, 31.5, 18.4.

**HRMS (ESI) m/z:** [M+H]<sup>+</sup> Calcd for C<sub>26</sub>H<sub>27</sub>N<sub>2</sub>S<sup>+</sup> 399.1889; Found 399.1885.

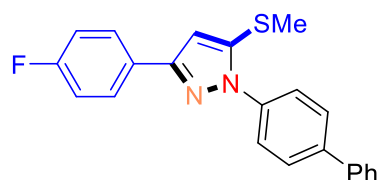

### 1-((1,1'-biphenyl)-4-yl)-3-(4-fluorophenyl)-5-(methylthio)-1H-pyrazole (3ha)

The compound was prepared from 4-isocyno-1,1'-biphenyl (0.3 mmol, 54 mg) and ((4-fluorophenyl)ethynyl)(methyl)sulfane (0.2 mmol, 33 mg) following the general procedure. purification by column chromatography (silica, PE:EA=25:1) afforded 48 mg (67%) of the title compound **3ha**.

**Physical state:** yellow liquid.

**<sup>1</sup>H NMR (400 MHz, CDCl<sub>3</sub>, 25 °C):** δ 7.88-7.82 (m, 2H), 7.72 (t, *J* = 1.2 Hz, 4H), 7.64 (dd, *J* = 8.3, 1.2 Hz, 2H), 7.48 (td, *J* = 7.3, 6.6, 1.3 Hz, 2H), 7.42-7.36 (m, 1H), 7.14-7.08 (m, 2H), 6.63 (s, 1H), 2.47 (s, 3H).

**<sup>13</sup>C NMR (100 MHz, CDCl<sub>3</sub>, 25 °C):** δ 163.0 (*J* = 246 Hz), 151.5, 141.0, 140.3, 139.4, 138.8, 129.2 (*J* = 3 Hz), 129.0, 127.8, 127.6 (*J* = 8 Hz), 127.3, 125.1, 115.7 (*J* = 22 Hz), 105.6, 18.4.

**<sup>19</sup>F NMR (376 MHz, CDCl<sub>3</sub>, 25 °C):** δ -114.83.

**HRMS (ESI) m/z:** [M+H]<sup>+</sup> Calcd for C<sub>22</sub>H<sub>18</sub>FN<sub>2</sub>S<sup>+</sup> 361.1169; Found 361.1168.

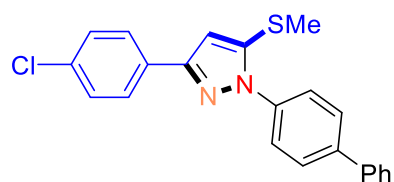

### 1-((1,1'-biphenyl)-4-yl)-3-(4-chlorophenyl)-5-(methylthio)-1H-pyrazole (3ia)

The compound was prepared from 4-isocyno-1,1'-biphenyl (0.3 mmol, 54 mg) and ((4-



chlorophenyl)ethynyl)(methyl)sulfane (0.2 mmol, 36 mg) following the general procedure. purification by column chromatography (silica, PE:EA=25:1) afforded 49 mg (65%) of the title compound **3ia**.

**Physical state:** Brownish yellow liquid.

**<sup>1</sup>H NMR (400 MHz, CDCl<sub>3</sub>, 25 °C):** δ 7.84-7.79 (m, 2H), 7.72 (s, 4H), 7.66-7.60 (m, 2H), 7.50-7.45 (m, 2H), 7.41-7.36 (m, 3H), 6.65 (s, 1H), 2.47 (s, 3H).

**<sup>13</sup>C NMR (100 MHz, CDCl<sub>3</sub>, 25 °C):** δ 151.3, 141.1, 140.3, 139.5, 138.8, 134.0, 131.5, 129.0, 129.0, 127.8, 127.3, 127.1, 125.1, 105.6, 18.3.

**HRMS (ESI) m/z:** [M+H]<sup>+</sup> Calcd for C<sub>22</sub>H<sub>18</sub>ClN<sub>2</sub>S<sup>+</sup> 377.0874; Found 377.0862.

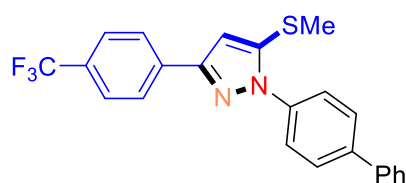

### 1-([1,1'-biphenyl]-4-yl)-5-(methylthio)-3-(4-(trifluoromethyl)phenyl)-1H-pyrazole (**3ja**)

The compound was prepared from 4-isocyano-1,1'-biphenyl (0.3 mmol, 54 mg) and methyl((4-(trifluoromethyl)phenyl)ethynyl)sulfane (0.2 mmol, 43 mg) following the general procedure. purification by column chromatography (silica, PE:EA=25:1) afforded 51 mg (62%) of the title compound **3ja**.

**Physical state:** yellow solid.

**Mp:** 137-139 °C.

**<sup>1</sup>H NMR (400 MHz, CDCl<sub>3</sub>, 25 °C):** δ 7.99 (d, *J* = 8.1 Hz, 2H), 7.73 (s, 4H), 7.69-7.63 (m, 4H), 7.48 (t, *J* = 7.4 Hz, 2H), 7.42-7.38 (m, 1H), 6.73 (s, 1H), 2.49 (s, 3H).

**<sup>13</sup>C NMR (100 MHz, CDCl<sub>3</sub>, 25 °C):** δ 150.9, 141.2, 140.2, 139.9, 138.6, 136.4, 130.0 (*J* = 32 Hz), 129.1, 127.9, 127.3, 125.9, 125.8 (*J* = 4f Hz) 125.1, 124.4 (*J* = 274 Hz), 105.8, 18.3.

**<sup>19</sup>F NMR (376 MHz, CDCl<sub>3</sub>, 25 °C):** δ -62.86.

**HRMS (ESI) m/z:** [M+H]<sup>+</sup> Calcd for C<sub>23</sub>H<sub>18</sub>F<sub>3</sub>N<sub>2</sub>S<sup>+</sup> 411.1137; Found 411.1128.

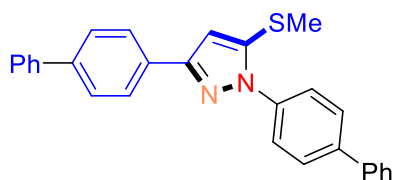

### 1,3-di([1,1'-biphenyl]-4-yl)-5-(methylthio)-1H-pyrazole (3ka)

The compound was prepared from 4-isocyano-1,1'-biphenyl (0.3 mmol, 54 mg) and ([1,1'-biphenyl]-4-ylethynyl)(methyl)sulfane (0.2 mmol, 45 mg) following the general procedure. purification by column chromatography (silica, PE:EA=25:1) afforded 61 mg (73%) of the title compound **3ka**.

**Physical state:** yellow amorphous solid.

**<sup>1</sup>H NMR (400 MHz, CDCl<sub>3</sub>, 25 °C):** δ 7.98-7.95 (m, 2H), 7.78-7.71 (m, 4H), 7.69 (d, *J* = 1.9 Hz, 1H), 7.66 (ddd, *J* = 8.0, 4.0, 1.5 Hz, 5H), 7.47 (dd, *J* = 8.1, 7.0 Hz, 4H), 7.38 (dtd, *J* = 9.8, 5.6, 2.6 Hz, 2H), 6.73 (s, 1H), 2.49 (s, 3H).

**<sup>13</sup>C NMR (100 MHz, CDCl<sub>3</sub>, 25 °C):** δ 152.0, 140.9, 140.9, 140.9, 140.3, 139.3, 138.9, 131.9, 129.0, 128.9, 127.8, 127.8, 127.5, 127.3, 127.1, 126.2, 125.1, 105.8, 18.3.

**HRMS (ESI) m/z:** [M+H]<sup>+</sup> Calcd for C<sub>28</sub>H<sub>23</sub>N<sub>2</sub>S<sup>+</sup> 419.1576; Found 419.1563.

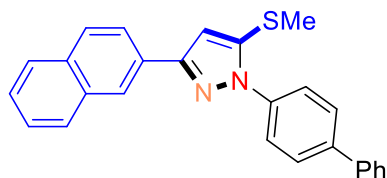

### 1-([1,1'-biphenyl]-4-yl)-5-(methylthio)-3-(naphthalen-2-yl)-1H-pyrazole (3la)

The compound was prepared from 4-isocyano-1,1'-biphenyl (0.3 mmol, 54 mg) and methyl(naphthalen-2-ylethynyl)sulfane (0.2 mmol, 40 mg) following the general procedure. purification by column chromatography (silica, PE:EA=25:1) afforded 56 mg (71%) of the title compound **3la**.

**Physical state:** yellow amorphous solid.

**<sup>1</sup>H NMR (400 MHz, CDCl<sub>3</sub>, 25 °C):** δ 8.34 (dd, *J* = 1.6, 0.8 Hz, 1H), 8.07 (dd, *J* = 8.6, 1.7 Hz, 1H), 7.93-7.90 (m, 2H), 7.88-7.84 (m, 1H), 7.81-7.77 (m, 2H), 7.76-7.73 (m, 2H), 7.68-7.64 (m, 2H), 7.52-7.47 (m, 4H), 7.43-7.37 (m, 1H), 6.84 (s, 1H), 2.51 (s, 3H).

<sup>13</sup>C NMR (100 MHz, CDCl<sub>3</sub>, 25 °C): δ 152.3, 140.9, 140.3, 139.4, 138.9, 133.7, 133.4, 130.3, 129.0, 128.5, 128.4, 127.9, 127.8, 127.8, 127.3, 126.4, 126.1, 125.2, 124.5, 124.1, 105.9, 18.3.

HRMS (ESI) m/z: [M+H]<sup>+</sup> Calcd for C<sub>26</sub>H<sub>21</sub>N<sub>2</sub>S<sup>+</sup> 393.1420; Found 393.1406.

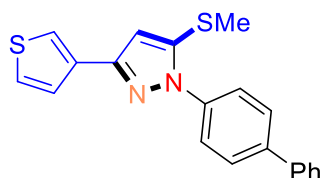

### 1-([1,1'-biphenyl]-4-yl)-5-(methylthio)-3-(thiophen-2-yl)-1H-pyrazole (3ma)

The compound was prepared from 4-isocyano-1,1'-biphenyl (0.3 mmol, 54 mg) and 2-((methylthio)ethynyl)thiophene (0.2 mmol, 31 mg) following the general procedure. purification by column chromatography (silica, PE:EA=25:1) afforded 47 mg (68%) of the title compound **3ma**.

**Physical state:** yellow liquid.

<sup>1</sup>H NMR (400 MHz, CDCl<sub>3</sub>, 25 °C): δ 7.71 (s, 4H), 7.65 (d, *J* = 3.0 Hz, 2H), 7.63 (t, *J* = 1.3 Hz, 1H), 7.55-7.54 (m, 1H), 7.49-7.45 (m, 2H), 7.40-7.36 (m, 2H), 6.58 (s, 1H), 2.46 (s, 3H).

<sup>13</sup>C NMR (100 MHz, CDCl<sub>3</sub>, 25 °C): δ 150.1, 141.7, 140.3, 139.0, 138.8, 134.8, 129.0, 127.8, 127.3, 126.1, 125.2, 121.2, 106.1, 18.3.

HRMS (ESI) m/z: [M+H]<sup>+</sup> Calcd for C<sub>20</sub>H<sub>17</sub>N<sub>2</sub>S<sub>2</sub><sup>+</sup> 349.0828; Found 349.0817.

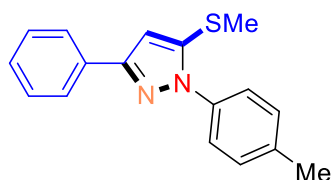

### 5-(methylthio)-3-phenyl-1-(p-tolyl)-1H-pyrazole (3ab)

The compound was prepared from 1-isocyano-4-methylbenzene (0.3 mmol, 35 mg) and methyl(phenylethynyl)sulfane (0.2 mmol, 30 mg) following the general procedure. purification by column chromatography (silica, PE:EA=25:1) afforded 41 mg (73%) of the title compound **3ab**.

**Physical state:** yellow liquid.

**<sup>1</sup>H NMR (400 MHz, CDCl<sub>3</sub>, 25 °C):** δ 7.90-7.85 (m, 2H), 7.57-7.53 (m, 2H), 7.44-7.40 (m, 2H), 7.36-7.32 (m, 1H), 7.03-6.98 (m, 2H), 6.65 (s, 1H), 3.86 (s, 3H), 2.41 (s, 3H).

**<sup>13</sup>C NMR (100 MHz, CDCl<sub>3</sub>, 25 °C):** δ 159.3, 151.9, 139.1, 133.0, 132.8, 128.7, 128.1, 126.5, 125.7, 114.2, 105.1, 55.6, 18.1.

**HRMS (ESI) m/z:** [M+H]<sup>+</sup> Calcd for C<sub>17</sub>H<sub>17</sub>N<sub>2</sub>S<sup>+</sup> 281.1107; Found 281.1109.

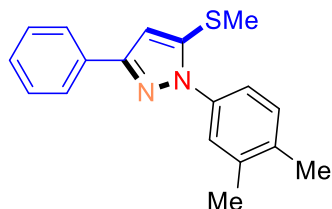

### 1-(3,4-dimethylphenyl)-5-(methylthio)-3-phenyl-1H-pyrazole (3ac)

The compound was prepared from 4-isocyano-1,2-dimethylbenzene (0.3 mmol, 39 mg) and methyl(phenylethynyl)sulfane (0.2 mmol, 30 mg) following the general procedure. purification by column chromatography (silica, PE:EA=25:1) afforded 42 mg (71%) of the title compound **3ac**.

**Physical state:** Brownish yellow liquid.

**<sup>1</sup>H NMR (400 MHz, CDCl<sub>3</sub>, 25 °C):** δ 7.79-7.73 (m, 2H), 7.34-7.28 (m, 3H), 7.25-7.19 (m, 2H), 7.12 (d, *J* = 7.9 Hz, 1H), 6.53 (s, 1H), 2.31 (s, 3H), 2.22 (s, 3H), 2.21 (s, 3H).

**<sup>13</sup>C NMR (100 MHz, CDCl<sub>3</sub>, 25 °C):** δ 151.9, 139.0, 137.6, 137.4, 136.8, 133.0, 130.0, 128.7, 128.0, 126.1, 125.7, 122.3, 105.0, 20.0, 19.6, 18.1.

**HRMS (ESI) m/z:** [M+H]<sup>+</sup> Calcd for C<sub>18</sub>H<sub>19</sub>N<sub>2</sub>S<sup>+</sup> 295.1263; Found 295.1262.

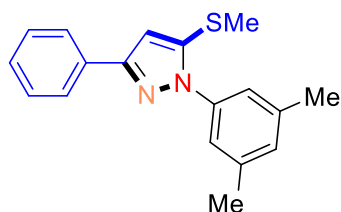

### 1-(3,5-dimethylphenyl)-5-(methylthio)-3-phenyl-1H-pyrazole (3ad)

The compound was prepared from 1-isocyano-4-methoxybenzene (0.3 mmol, 40 mg) and methyl(phenylethynyl)sulfane (0.2 mmol, 30 mg) following the general procedure. purification by column chromatography (silica, PE:EA=25:1) afforded 42 mg (72%) of

the title compound **3ad**.

**Physical state:** Brownish yellow liquid.

**<sup>1</sup>H NMR (400 MHz, CDCl<sub>3</sub>, 25 °C):** δ 7.87-7.82 (m, 2H), 7.40 (ddt, *J* = 7.2, 6.0, 1.0 Hz, 2H), 7.33-7.27 (m, 1H), 7.25-7.22 (m, 2H), 7.02 (dt, *J* = 1.9, 1.0 Hz, 1H), 6.61 (d, *J* = 0.8 Hz, 1H), 2.42 (d, *J* = 0.9 Hz, 3H), 2.37 (s, 6H).

**<sup>13</sup>C NMR (100 MHz, CDCl<sub>3</sub>, 25 °C):** δ 152.0, 139.4, 139.2, 138.9, 133.0, 129.8, 128.7, 128.1, 125.8, 122.7, 104.9, 21.4, 18.1.

**HRMS (ESI) m/z:** [M+H]<sup>+</sup> Calcd for C<sub>18</sub>H<sub>19</sub>N<sub>2</sub>S<sup>+</sup> 295.1263; Found 295.1259.

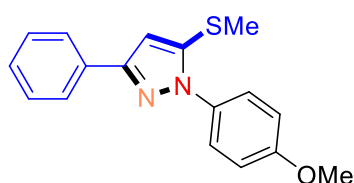

### 1-(4-methoxyphenyl)-5-(methylthio)-3-phenyl-1H-pyrazole (**3ae**)

The compound was prepared from 1-isocyano-4-methoxybenzene (0.3 mmol, 40 mg) and methyl(phenylethynyl)sulfane (0.2 mmol, 30 mg) following the general procedure. purification by column chromatography (silica, PE:EA=25:1) afforded 44 mg (75%) of the title compound **3ae**.

**Physical state:** yellow liquid.

**<sup>1</sup>H NMR (400 MHz, CDCl<sub>3</sub>, 25 °C):** δ 7.90-7.85 (m, 2H), 7.57-7.53 (m, 2H), 7.44-7.40 (m, 2H), 7.36-7.32 (m, 1H), 7.03-6.98 (m, 2H), 6.65 (s, 1H), 3.86 (s, 3H), 2.41 (s, 3H).

**<sup>13</sup>C NMR (100 MHz, CDCl<sub>3</sub>, 25 °C):** δ 159.3, 151.9, 139.1, 133.0, 132.8, 128.7, 128.1, 126.5, 125.7, 114.2, 105.1, 55.6, 18.1.

**HRMS (ESI) m/z:** [M+H]<sup>+</sup> Calcd for C<sub>17</sub>H<sub>17</sub>N<sub>2</sub>OS<sup>+</sup> 297.1056; Found 297.1052.

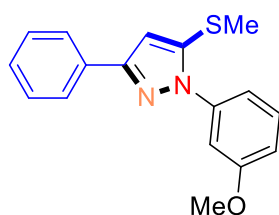

### 1-(3-methoxyphenyl)-5-(methylthio)-3-phenyl-1H-pyrazole (**3af**)

The compound was prepared from 1-isocyano-3-methoxybenzene (0.3 mmol, 40 mg)

and methyl(phenylethynyl)sulfane (0.2 mmol, 30 mg) following the general procedure. purification by column chromatography (silica, PE:EA=25:1) afforded 43 mg (73%) of the title compound **3af**.

**Physical state:** yellow liquid.

**<sup>1</sup>H NMR (400 MHz, CDCl<sub>3</sub>, 25 °C):** δ 6.61 (d, *J* = 7.5 Hz, 2H), 6.15 (q, *J* = 7.2, 6.6 Hz, 4H), 5.97 (d, *J* = 7.1 Hz, 2H), 5.69 (d, *J* = 8.2 Hz, 1H), 5.39 (s, 1H), 2.60 (s, 3H), 1.19 (s, 3H).

**<sup>13</sup>C NMR (100 MHz, CDCl<sub>3</sub>, 25 °C):** δ 160.2, 152.2, 140.7, 139.3, 132.9, 129.8, 128.8, 128.2, 125.8, 117.1, 114.2, 110.4, 105.4, 55.6, 18.2.

**HRMS (ESI) m/z:** [M+H]<sup>+</sup> Calcd for C<sub>17</sub>H<sub>17</sub>N<sub>2</sub>OS<sup>+</sup> 297.1056; Found 297.1052.

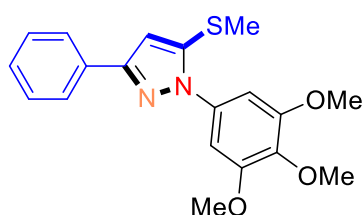

### 5-(methylthio)-3-phenyl-1-(3,4,5-trimethoxyphenyl)-1H-pyrazole (**3ag**)

The compound was prepared from 5-isocyano-1,2,3-trimethoxybenzene (0.3 mmol, 58 mg) and methyl(phenylethynyl)sulfane (0.2 mmol, 30 mg) following the general procedure. purification by column chromatography (silica, PE:EA=25:1) afforded 53 mg (74%) of the title compound **3ag**.

**Physical state:** yellow liquid.

**<sup>1</sup>H NMR (400 MHz, CDCl<sub>3</sub>, 25 °C):** δ 7.88-7.84 (m, 2H), 7.44-7.39 (m, 2H), 7.36-7.31 (m, 1H), 6.87 (s, 2H), 6.62 (s, 1H), 3.91 (s, 6H), 3.89 (s, 3H), 2.47 (s, 3H).

**<sup>13</sup>C NMR (100 MHz, CDCl<sub>3</sub>, 25 °C):** δ 153.4, 152.2, 139.5, 137.7, 135.3, 132.8, 128.8, 128.3, 125.8, 104.7, 102.5, 61.1, 56.4, 17.9.

**HRMS (ESI) m/z:** [M+H]<sup>+</sup> Calcd for C<sub>19</sub>H<sub>21</sub>N<sub>2</sub>O<sub>3</sub>S<sup>+</sup> 357.1267; Found 357.1255.

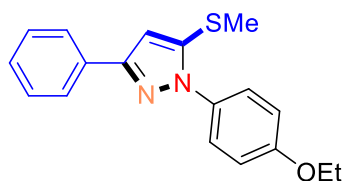

### 1-(4-ethoxyphenyl)-5-(methylthio)-3-phenyl-1H-pyrazole (**3ah**)

The compound was prepared from 1-ethoxy-4-isocyanobenzene (0.3 mmol, 44 mg) and methyl(phenylethynyl)sulfane (0.2 mmol, 30 mg) following the general procedure. purification by column chromatography (silica, PE:EA=25:1) afforded 47 mg (76%) of the title compound **3ah**.

**Physical state:** yellow liquid.

**<sup>1</sup>H NMR (400 MHz, CDCl<sub>3</sub>, 25 °C):** δ 7.88-7.84 (m, 2H), 7.55-7.50 (m, 2H), 7.41 (dd, *J* = 8.3, 6.8 Hz, 2H), 7.35-7.31 (m, 1H), 7.01-6.96 (m, 2H), 6.65 (s, 1H), 4.08 (q, *J* = 7.0 Hz, 2H), 2.41 (s, 3H), 1.45 (t, *J* = 7.0 Hz, 3H).

**<sup>13</sup>C NMR (100 MHz, CDCl<sub>3</sub>, 25 °C):** δ 158.8, 151.9, 139.1, 133.0, 132.6, 128.7, 128.1, 126.6, 125.7, 114.7, 105.1, 63.9, 18.2, 14.9.

**HRMS (ESI) m/z:** [M+H]<sup>+</sup> Calcd for C<sub>18</sub>H<sub>19</sub>N<sub>2</sub>OS<sup>+</sup> 311.1213; Found 311.1203.

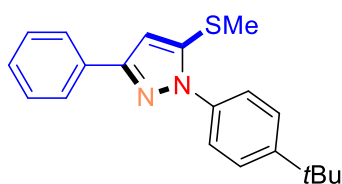

#### 1-(4-(*tert*-butyl)phenyl)-5-(methylthio)-3-phenyl-1*H*-pyrazole (**3ai**)

The compound was prepared from 1-(*tert*-butyl)-4-isocyanobenzene (0.3 mmol, 48 mg) and methyl(phenylethynyl)sulfane (0.2 mmol, 30 mg) following the general procedure. purification by column chromatography (silica, PE:EA=25:1) afforded 45 mg (70%) of the title compound **3ai**.

**Physical state:** yellow liquid.

**<sup>1</sup>H NMR (400 MHz, CDCl<sub>3</sub>, 25 °C):** δ 7.91-7.87 (m, 2H), 7.59 (d, *J* = 6.5 Hz, 2H), 7.52 (d, *J* = 8.3 Hz, 2H), 7.45-7.41 (m, 2H), 7.36-7.32 (m, 1H), 6.67 (s, 1H), 2.44 (s, 3H), 1.38 (s, 9H).

**<sup>13</sup>C NMR (100 MHz, CDCl<sub>3</sub>, 25 °C):** δ 152.0, 151.2, 139.0, 137.1, 133.0, 128.7, 128.1, 126.0, 125.7, 124.5, 105.3, 34.8, 31.4, 18.2.

**HRMS (ESI) m/z:** [M+H]<sup>+</sup> Calcd for C<sub>20</sub>H<sub>23</sub>N<sub>2</sub>S<sup>+</sup> 323.1576; Found 323.1566.

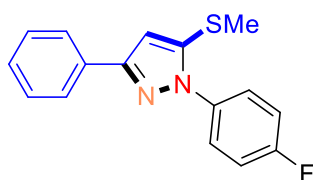

### 1-(4-fluorophenyl)-5-(methylthio)-3-phenyl-1H-pyrazole (3aj)

The compound was prepared from 1-fluoro-4-isocyanobenzene (0.3 mmol, 36 mg) and methyl(phenylethynyl)sulfane (0.2 mmol, 30 mg) following the general procedure. purification by column chromatography (silica, PE:EA=25:1) afforded 36 mg (63%) of the title compound **3aj**.

**Physical state:** Brownish yellow liquid.

**<sup>1</sup>H NMR (400 MHz, CDCl<sub>3</sub>, 25 °C):** δ 7.85 (d, *J* = 7.4 Hz, 2H), 7.63 (d, *J* = 4.0 Hz, 2H), 7.42 (s, 2H), 7.34 (s, 1H), 7.19 (d, *J* = 8.2 Hz, 2H), 6.67 (s, 1H), 2.43 (s, 3H).

**<sup>13</sup>C NMR (100 MHz, CDCl<sub>3</sub>, 25 °C):** δ 162.1 (d, *J* = 246), 152.4, 139.2, 135.8, 132.8, 128.8, 128.3, 126.9 (d, *J* = 8), 125.8, 116.0 (d, *J* = 23), 105.8, 18.3.

**<sup>19</sup>F NMR (376 MHz, CDCl<sub>3</sub>, 25 °C):** δ -114.26.

**HRMS (ESI) m/z:** [M+H]<sup>+</sup> Calcd for C<sub>16</sub>H<sub>14</sub>FN<sub>2</sub>S<sup>+</sup> 285.0856; Found 285.0848.

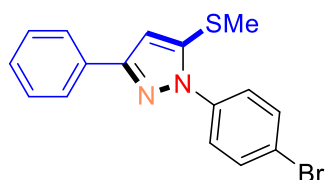

### 1-(4-bromophenyl)-5-(methylthio)-3-phenyl-1H-pyrazole (3ak)

The compound was prepared from 1-bromo-4-isocyanobenzene (0.3 mmol, 54 mg) and methyl(phenylethynyl)sulfane (0.2 mmol, 30 mg) following the general procedure. purification by column chromatography (silica, PE:EA=25:1) afforded 42 mg (61%) of the title compound **3ak**.

**Physical state:** Brownish yellow liquid.

**<sup>1</sup>H NMR (400 MHz, CDCl<sub>3</sub>, 25 °C):** δ 7.82-7.73 (m, 2H), 7.50 (qd, *J* = 8.8, 1.7 Hz, 4H), 7.33 (ddd, *J* = 7.7, 6.6, 1.5 Hz, 2H), 7.28-7.23 (m, 1H), 6.58 (s, 1H), 2.34 (s, 3H).

**<sup>13</sup>C NMR (100 MHz, CDCl<sub>3</sub>, 25 °C):** δ 152.6, 139.2, 138.7, 132.7, 132.2, 128.8, 128.4, 126.3, 125.8, 121.6, 106.1, 18.3.

**HRMS (ESI) m/z:** [M+H]<sup>+</sup> Calcd for C<sub>16</sub>H<sub>14</sub>BrN<sub>2</sub>S<sup>+</sup> 345.0056; Found 345.0036.

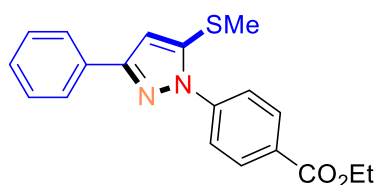



### Ethyl 4-(5-(methylthio)-3-phenyl-1*H*-pyrazol-1-yl)benzoate (**3al**)

The compound was prepared from ethyl 4-isocyanobenzoate (0.3 mmol, 53 mg) and methyl(phenylethynyl)sulfane (0.2 mmol, 30 mg) following the general procedure. purification by column chromatography (silica, PE:EA=25:1) afforded 42 mg (62%) of the title compound **3al**.

**Physical state:** yellow liquid.

**<sup>1</sup>H NMR (400 MHz, CDCl<sub>3</sub>, 25 °C):** δ 8.19-8.16 (m, 2H), 7.86 (dt, *J* = 8.3, 1.2 Hz, 2H), 7.83-7.80 (m, 2H), 7.46-7.41 (m, 2H), 7.37-7.32 (m, 1H), 6.69 (s, 1H), 4.42 (q, *J* = 8.0 Hz, 2H), 2.46 (s, 3H), 1.44 (t, *J* = 4.0 Hz, 3H).

**<sup>13</sup>C NMR (100 MHz, CDCl<sub>3</sub>, 25 °C):** δ 166.1, 152.9, 143.3, 139.5, 132.6, 130.6, 129.4, 128.9, 128.5, 125.9, 124.0, 106.5, 61.4, 18.4, 14.5.

**HRMS (ESI) m/z:** [M+H]<sup>+</sup> Calcd for C<sub>19</sub>H<sub>19</sub>N<sub>2</sub>O<sub>2</sub>S<sup>+</sup> 339.1162; Found 339.1155.

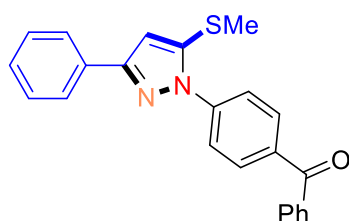

### 4-(5-(methylthio)-3-phenyl-1*H*-pyrazol-1-yl)phenyl(phenyl)methanone (**3am**)

The compound was prepared from (4-isocyanophenyl)(phenyl)methanone (0.3 mmol, 62 mg) and methyl(phenylethynyl)sulfane (0.2 mmol, 30 mg) following the general procedure. purification by column chromatography (silica, PE:EA=25:1) afforded 51 mg (68%) of the title compound **3am**.

**Physical state:** yellow amorphous solid.

**<sup>1</sup>H NMR (400 MHz, CDCl<sub>3</sub>, 25 °C):** δ 7.95 (dd, *J* = 8.6, 2.2 Hz, 2H), 7.91-7.81 (m, 6H), 7.66-7.59 (m, 1H), 7.52 (t, *J* = 7.7 Hz, 2H), 7.44 (t, *J* = 7.6 Hz, 2H), 7.40-7.33 (m, 1H), 6.71 (s, 1H), 2.50 (s, 3H).

**<sup>13</sup>C NMR (100 MHz, CDCl<sub>3</sub>, 25 °C):** δ 195.8, 153.0, 142.9, 139.6, 137.5, 136.3, 132.8, 132.5, 131.2, 130.2, 128.9, 128.5, 125.9, 123.9, 106.4, 18.4.

**HRMS (ESI) m/z:** [M+H]<sup>+</sup> Calcd for C<sub>23</sub>H<sub>19</sub>N<sub>2</sub>OS<sup>+</sup> 371.1213; Found 371.1195.

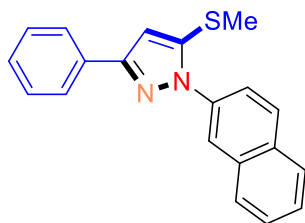

### 5-(methylthio)-1-(naphthalen-2-yl)-3-phenyl-1H-pyrazole (3an)

The compound was prepared from 2-isocyanonaphthalene (0.3 mmol, 46 mg) and methyl(phenylethynyl)sulfane (0.2 mmol, 30 mg) following the general procedure. purification by column chromatography (silica, PE:EA=25:1) afforded 46 mg (73%) of the title compound **3an**.

**Physical state:** yellow amorphous solid.

**<sup>1</sup>H NMR (400 MHz, CDCl<sub>3</sub>, 25 °C):** δ 8.14-8.12 (m, 1H), 7.99-7.95 (m, 1H), 7.94-7.89 (m, 4H), 7.84 (dd, *J* = 8.7, 2.1 Hz, 1H), 7.58-7.52 (m, 2H), 7.47-7.42 (m, 2H), 7.38-7.33 (m, 1H), 6.72 (s, 1H), 2.45 (s, 3H).

**<sup>13</sup>C NMR (100 MHz, CDCl<sub>3</sub>, 25 °C):** δ 152.5, 139.5, 137.2, 133.2, 132.9, 132.6, 129.1, 128.8, 128.4, 128.3, 127.9, 126.9, 126.7, 125.9, 123.3, 123.0, 105.7, 18.3.

**HRMS (ESI) m/z:** [M+H]<sup>+</sup> Calcd for C<sub>20</sub>H<sub>17</sub>N<sub>2</sub>S<sup>+</sup> 317.1107; Found 317.1101.

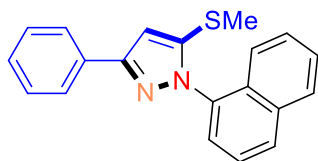

### 5-(methylthio)-1-(naphthalen-1-yl)-3-phenyl-1H-pyrazole (3ao)

The compound was prepared from 1-isocyanonaphthalene (0.3 mmol, 46 mg) and methyl(phenylethynyl)sulfane (0.2 mmol, 30 mg) following the general procedure. purification by column chromatography (silica, PE:EA=25:1) afforded 47 mg (74%) of the title compound **3ao**.

**Physical state:** yellow liquid.

**<sup>1</sup>H NMR (400 MHz, CDCl<sub>3</sub>, 25 °C):** δ 8.02-7.99 (m, 1H), 7.95-7.92 (m, 2H), 7.63 (d, *J* = 1.6 Hz, 1H), 7.58-7.49 (m, 5H), 7.44 (ddd, *J* = 7.7, 5.8, 1.6 Hz, 2H), 7.37 (dt, *J* = 8.3, 1.9 Hz, 1H), 6.81 (s, 1H), 2.34 (s, 3H).

**<sup>13</sup>C NMR (100 MHz, CDCl<sub>3</sub>, 25 °C):** δ 152.5, 141.3, 135.9, 134.4, 133.0, 130.8, 130.0, 128.8, 128.2, 127.5, 126.8, 125.9, 125.8, 125.1, 123.4, 104.9, 18.3.

**HRMS (ESI) m/z:**  $[M+H]^+$  Calcd for  $C_{20}H_{17}N_2S^+$  317.1107; Found 317.1100.

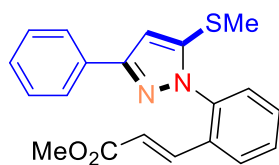

**Methyl (*E*)-3-(2-(5-(methylthio)-3-phenyl-1*H*-pyrazol-1-yl)phenyl)acrylate (3ap)**

The compound was prepared from methyl (*E*)-3-(2-isocyanophenyl)acrylate (0.3 mmol, 56 mg) and methyl(phenylethynyl)sulfane (0.2 mmol, 30 mg) following the general procedure. purification by column chromatography (silica, PE:EA=25:1) afforded 43 mg (61%) of the title compound **3ap**.

**Physical state:** yellow liquid.

**$^1H$  NMR (400 MHz,  $CDCl_3$ , 25 °C):**  $\delta$  7.84 (d,  $J = 7.6$  Hz, 2H), 7.81-7.75 (m, 1H), 7.55-7.49 (m, 2H), 7.48-7.37 (m, 4H), 7.34 (t,  $J = 7.6$  Hz, 1H), 6.72 (s, 1H), 6.33 (d,  $J = 16.1$  Hz, 1H), 3.72 (s, 3H), 2.37 (s, 3H).

**$^{13}C$  NMR (100 MHz,  $CDCl_3$ , 25 °C):**  $\delta$  167.1, 152.9, 140.9, 139.7, 138.6, 132.8, 132.6, 130.7, 129.9, 129.0, 128.8, 128.3, 127.6, 126.0, 120.6, 105.7, 51.9, 29.9, 18.4.

**HRMS (ESI) m/z:**  $[M+H]^+$  Calcd for  $C_{20}H_{19}N_2O_2S^+$  351.1162; Found 351.1162.

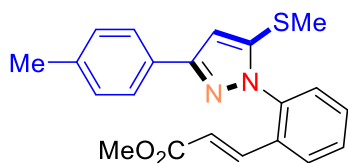

**Methyl (*E*)-3-(2-(5-(methylthio)-3-(*p*-tolyl)-1*H*-pyrazol-1-yl)phenyl)acrylate (3bp)**

The compound was prepared from methyl (*E*)-3-(2-isocyanophenyl)acrylate (0.3 mmol, 56 mg) and methyl(*p*-tolylethynyl)sulfane (0.2 mmol, 32 mg) following the general procedure. purification by column chromatography (silica, PE:EA=25:1) afforded 46 mg (63%) of the title compound **3bp**.

**Physical state:** yellow liquid.

**$^1H$  NMR (400 MHz,  $CDCl_3$ , 25 °C):**  $\delta$  7.79-7.75 (m, 1H), 7.75-7.71 (m, 2H), 7.54-7.49 (m, 2H), 7.47-7.44 (m, 1H), 7.42 (d,  $J = 16.1$  Hz, 1H), 7.24-7.20 (m, 2H), 6.69 (s, 1H), 6.33 (d,  $J = 16.0$  Hz, 1H), 3.72 (s, 3H), 2.38 (s, 3H), 2.37 (s, 3H).

**$^{13}C$  NMR (100 MHz,  $CDCl_3$ , 25 °C):**  $\delta$  167.0, 152.9, 140.7, 139.7, 138.6, 138.1, 132.5, 130.7, 130.0, 129.8, 129.5, 129.0, 127.5, 125.8, 120.5, 105.5, 51.9, 21.4, 18.3.

**HRMS (ESI) m/z:** [M+H]<sup>+</sup> Calcd for C<sub>21</sub>H<sub>21</sub>N<sub>2</sub>O<sub>2</sub>S<sup>+</sup> 365.1318; Found 365.1314.

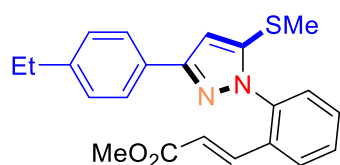

**Methyl** (E)-3-(2-(3-(4-ethylphenyl)-5-(methylthio)-1H-pyrazol-1-yl)phenyl)acrylate (**3ep**)

The compound was prepared from methyl (*E*)-3-(2-isocyanophenyl)acrylate (0.3 mmol, 56 mg) and ((4-ethylphenyl)ethynyl)(methyl)sulfane (0.2 mmol, 35 mg) following the general procedure. purification by column chromatography (silica, PE:EA=25:1) afforded 47 mg (62%) of the title compound **3ep**.

**Physical state:** yellow amorphous solid.

**<sup>1</sup>H NMR (400 MHz, CDCl<sub>3</sub>, 25 °C):** δ 7.35-7.31 (m, 3H), 7.10-7.06 (m, 2H), 7.04-7.01 (m, 1H), 6.98 (d, *J* = 16.1 Hz, 1H), 6.84-6.80 (m, 2H), 6.26 (s, 1H), 5.89 (d, *J* = 16.0 Hz, 1H), 3.28 (s, 3H), 2.25 (q, *J* = 7.6 Hz, 2H), 1.93 (s, 3H), 0.83 (t, *J* = 7.4, 3H).

**<sup>13</sup>C NMR (100 MHz, CDCl<sub>3</sub>, 25 °C):** δ 167.0, 152.9, 144.5, 140.7, 139.7, 138.6, 132.5, 130.6, 130.2, 129.8, 128.9, 128.3, 127.5, 125.9, 120.5, 105.5, 51.8, 28.8, 18.3, 15.7.

**HRMS (ESI) m/z:** [M+H]<sup>+</sup> Calcd for C<sub>22</sub>H<sub>23</sub>N<sub>2</sub>O<sub>2</sub>S<sup>+</sup> 379.1475; Found 379.1469.

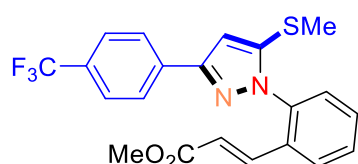

**Methyl** (E)-3-(2-(5-(methylthio)-3-(4-(trifluoromethyl)phenyl)-1H-pyrazol-1-yl)phenyl)acrylate (**3jp**)

The compound was prepared from 4-isocyano-1,1'-biphenyl (0.3 mmol, 54 mg) and methyl((4-(trifluoromethyl)phenyl)ethynyl)sulfane (0.2 mmol, 43 mg) following the general procedure. purification by column chromatography (silica, PE:EA=25:1) afforded 47 mg (56%) of the title compound **3jp**.

**Physical state:** yellow amorphous solid.

**<sup>1</sup>H NMR (400 MHz, CDCl<sub>3</sub>, 25 °C):** δ 7.94 (d, *J* = 8.0 Hz, 2H), 7.82-7.77 (m, 1H), 7.66 (d, *J* = 8.1 Hz, 2H), 7.57-7.50 (m, 2H), 7.48-7.44 (m, 1H), 7.39 (d, *J* = 16.1 Hz,

1H), 6.75 (s, 1H), 6.35 (d,  $J = 16.0$  Hz, 1H), 3.72 (s, 3H), 2.39 (s, 3H).

$^{13}\text{C}$  NMR (100 MHz,  $\text{CDCl}_3$ , 25 °C):  $\delta$  167.0, 151.5, 141.6, 139.5, 138.4, 136.2, 132.5, 130.8, 130.1, 129.9, 128.8, 127.6, 126.1, 125.8, 120.7, 105.8, 51.9, 29.9, 18.3.

$^{19}\text{F}$  NMR (376 MHz,  $\text{CDCl}_3$ , 25 °C):  $\delta$  -62.75.

HRMS (ESI)  $m/z$ :  $[\text{M}+\text{H}]^+$  Calcd for  $\text{C}_{21}\text{H}_{18}\text{F}_3\text{N}_2\text{O}_2\text{S}^+$  419.1036; Found 419.1025.

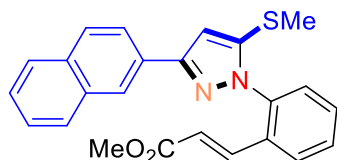

**Methyl (E)-3-(2-(5-(methylthio)-3-(naphthalen-2-yl)-1H-pyrazol-1-yl)phenyl)acrylate (3lp)**

The compound was prepared from methyl (*E*)-3-(2-isocyanophenyl)acrylate (0.3 mmol, 56 mg) and methyl(naphthalen-2-ylethynyl)sulfane (0.2 mmol, 40 mg) following the general procedure. purification by column chromatography (silica, PE:EA=25:1) afforded 50 mg (62%) of the title compound **3lp**.

**Physical state:** yellow amorphous solid.

$^1\text{H}$  NMR (400 MHz,  $\text{CDCl}_3$ , 25 °C):  $\delta$  8.34-8.26 (m, 1H), 8.00 (dd,  $J = 8.6, 1.7$  Hz, 1H), 7.91-7.87 (m, 2H), 7.86-7.77 (m, 2H), 7.55-7.44 (m, 6H), 6.86 (s, 1H), 6.36 (d,  $J = 16.0$  Hz, 1H), 3.71 (s, 3H), 2.41 (s, 3H).

$^{13}\text{C}$  NMR (100 MHz,  $\text{CDCl}_3$ , 25 °C):  $\delta$  167.0, 152.9, 141.2, 139.7, 138.6, 133.7, 133.4, 132.6, 130.7, 130.2, 129.9, 129.0, 128.5, 128.4, 127.9, 127.6, 126.4, 126.1, 124.6, 124.1, 120.6, 105.8, 51.9, 18.3.

HRMS (ESI)  $m/z$ :  $[\text{M}+\text{H}]^+$  Calcd for  $\text{C}_{24}\text{H}_{21}\text{N}_2\text{O}_2\text{S}^+$  419.1036; Found 419.1025.

## 6. General procedure for the synthesis of selenomethyl-substituted pyrazoles

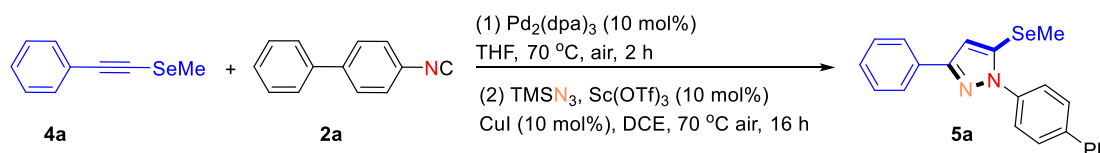

A mixture of  $\text{Pd}_2(\text{dpa})_3$  (0.02 mmol, 19 mg), alkynyl selenides **4a** (0.2 mmol, 39 mg) and isocyanide **2a** (0.3 mmol, 54 mg) in THF (2 mL) was stirred at 70 °C (heating oil temperature) in a sealed tube under air atmosphere. After 2 h, the resulting mixture was cooled down to room temperature and then filtered to a round bottom flask by a short

pad of silica gel (eluent: CH<sub>2</sub>Cl<sub>2</sub>). Volatiles were evaporated under reduced pressure. The crude products were directly used in the next reaction with without further purification.

The above crude mixture was dissolved in DCE (2 mL) and then Sc(OTf)<sub>3</sub> (0.02 mmol, 10 mg), CuI (0.02 mmol, 4 mg) and TMSN<sub>3</sub> (0.3 mmol, 35 mg) was added. The reaction mixture was stirred at 70 °C (heating mantle temperature). After 16 h, the resulting mixture is filtered by a short pad of silica gel (eluent: CH<sub>2</sub>Cl<sub>2</sub>) and concentrated in vacuo then the crude product was purified by column chromatography using PE/EA (25:1-20:1) to provide the corresponding compounds **5a**.

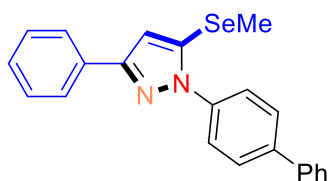

#### 1-([1,1'-biphenyl]-4-yl)-5-(methylthio)-3-phenyl-1H-pyrazole (**5a**)

The compound was prepared from 4-isocyano-1,1'-biphenyl (0.3 mmol, 54 mg) and methyl(phenylethynyl)selane (0.2 mmol, 39 mg) following the general procedure. Purification was performed by a preparation plate with silica gel ((silica, 30:1 petroleum ether : EtOAc) to afford 54 mg (69%) of the title compound **5a**.

**Physical state:** yellow solid.

**Mp:** 183- 185 °C.

**<sup>1</sup>H NMR (600 MHz, CDCl<sub>3</sub>, 25 °C):** δ 7.92-7.87 (m, 2H), 7.72 (d, *J* = 1.0 Hz, 3H), 7.65 (dq, *J* = 7.3, 1.2 Hz, 2H), 7.51-7.33 (m, 7H), 6.76 (s, 1H), 2.34 (s, 3H).

**<sup>13</sup>C NMR (150 MHz, CDCl<sub>3</sub>, 25 °C):** δ 152.9, 141.0, 140.3, 139.5, 132.9, 130.5, 129.0, 128.8, 128.2, 127.8, 127.3, 125.9, 125.3, 108.5, 9.5, 1.2.

**HRMS (ESI) m/z:** [M+H]<sup>+</sup> Calcd for C<sub>22</sub>H<sub>19</sub>N<sub>5</sub>Se 391.0708; Found 391.0694.

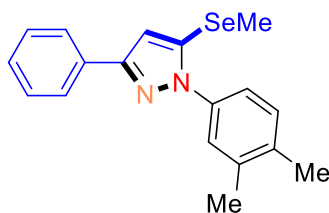

#### 1-(3,4-dimethylphenyl)-5-(methylselenanyl)-3-phenyl-1H-pyrazole (**5b**)

The compound was prepared from 4-isocyano-1,2-dimethylbenzene (0.3 mmol, 36 mg) and methyl(phenylethynyl)selane (0.2 mmol, 39 mg) following the general procedure. Purification was performed by a preparation plate with silica gel ((silica, 30:1 petroleum ether : EtOAc) to afford 47 mg (68%) of the title compound **5b**.

**Physical state:** yellow liquid.

**<sup>1</sup>H NMR (600 MHz, CDCl<sub>3</sub>, 25 °C):** δ 8.14-8.11 (m, 2H), 7.70-7.65 (m, 3H), 7.61-7.56 (m, 2H), 7.50 (d, *J* = 8.0 Hz, 1H), 6.96 (s, 1H), 2.60 (s, 3H), 2.59 (s, 3H), 2.57 (s, 3H).

**<sup>13</sup>C NMR (150 MHz, CDCl<sub>3</sub>, 25 °C):** δ 152.5, 138.1, 137.8, 137.0, 133.1, 130.6, 130.0, 128.8, 128.1, 126.3, 125.8, 122.4, 107.8, 20.0, 19.7, 9.3.

**HRMS (ESI) m/z:** [M+H]<sup>+</sup> Calcd for C<sub>19</sub>H<sub>19</sub>N<sub>2</sub>Se 343.0708; Found 343.0708.

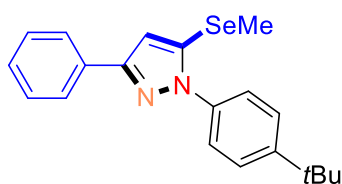

#### 1-(4-(tert-butyl)phenyl)-5-(methylselanyl)-3-phenyl-1H-pyrazole (**5c**)

The compound was prepared from 1-(tert-butyl)-4-isocyanobenzene (0.3 mmol, 48 mg) and methyl(phenylethynyl)selane (0.2 mmol, 39 mg) following the general procedure. Purification was performed by a preparation plate with silica gel ((silica, 30:1 petroleum ether : EtOAc) to afford 48 mg (65%) of the title compound **5c**.

**Physical state:** yellow liquid.

**<sup>1</sup>H NMR (600 MHz, CDCl<sub>3</sub>, 25 °C):** δ 7.90-7.85 (m, 2H), 7.56-7.49 (m, 4H), 7.44-7.39 (m, 2H), 7.35-7.31 (m, 1H), 6.72 (s, 1H), 2.30 (s, 3H), 1.38 (s, 9H).

**<sup>13</sup>C NMR (150 MHz, CDCl<sub>3</sub>, 25 °C):** δ 152.6, 151.3, 137.8, 133.0, 130.4, 128.7, 128.1, 126.1, 125.8, 124.6, 108.0, 34.9, 31.5, 9.4.

**HRMS (ESI) m/z:** [M+H]<sup>+</sup> Calcd for C<sub>20</sub>H<sub>23</sub>N<sub>2</sub>Se 371.1021; Found 371.1022.

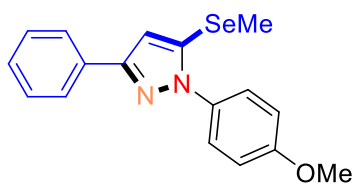

#### 1-(4-methoxyphenyl)-5-(methylselanyl)-3-phenyl-1H-pyrazole (**5d**)

The compound was prepared from 1-isocyano-4-methoxybenzene (0.3 mmol, 40 mg) and methyl(phenylethynyl)selane (0.2 mmol, 39 mg) following the general procedure. Purification was performed by a preparation plate with silica gel ((silica, 30:1 petroleum ether : EtOAc) to afford 47 mg (69%) of the title compound **5d**.

**Physical state:** yellow liquid.

**<sup>1</sup>H NMR (600 MHz, CDCl<sub>3</sub>, 25 °C):** δ 7.87-7.83 (m, 2H), 7.53-7.49 (m, 2H), 7.43-7.39 (m, 2H), 7.32 (q, *J* = 3.0, 2.3 Hz, 1H), 7.01-6.98 (m, 2H), 6.70 (s, 1H), 3.87 (s, 3H), 2.27 (s, 3H).

**<sup>13</sup>C NMR (150 MHz, CDCl<sub>3</sub>, 25 °C):** δ 159.5, 152.5, 133.6, 130.7, 128.8, 128.1, 126.7, 125.8, 114.3, 108.0, 55.7, 9.3.

**HRMS (ESI) m/z:** [M+H]<sup>+</sup> Calcd for C<sub>17</sub>H<sub>17</sub>N<sub>2</sub>OSe 345.0501; Found 345.0501.

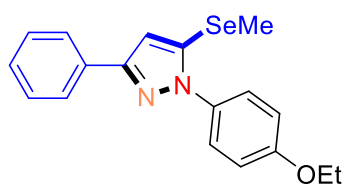

#### 1-(4-ethoxyphenyl)-5-(methylselanyl)-3-phenyl-1H-pyrazole (**5e**)

The compound was prepared from 1-ethoxy-4-isocyanobenzene (0.3 mmol, 44 mg) and methyl(phenylethynyl)selane (0.2 mmol, 39 mg) following the general procedure. Purification was performed by a preparation plate with silica gel ((silica, 30:1 petroleum ether : EtOAc) to afford 48 mg (67%) of the title compound **5e**.

**Physical state:** yellow liquid.

**<sup>1</sup>H NMR (600 MHz, CDCl<sub>3</sub>, 25 °C):** δ 7.89-7.82 (m, 2H), 7.52-7.47 (m, 2H), 7.41 (tq, *J* = 7.0, 0.8 Hz, 2H), 7.34-7.30 (m, 1H), 7.02-6.95 (m, 2H), 6.69 (s, 1H), 4.09 (q, *J* = 7.0, 2H), 2.27 (s, 3H), 1.45 (t, *J* = 7.0, 3H).

**<sup>13</sup>C NMR (150 MHz, CDCl<sub>3</sub>, 25 °C):** δ 158.9, 152.4, 133.3, 133.1, 130.6, 128.8, 128.1, 126.7, 125.8, 114.8, 107.9, 63.9, 14.9, 9.2.

**HRMS (ESI) m/z:** [M+H]<sup>+</sup> Calcd for C<sub>18</sub>H<sub>19</sub>N<sub>2</sub>OSe 359.0657; Found 359.0655.

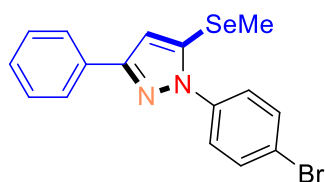



### 1-(4-bromophenyl)-5-(methylselanyl)-3-phenyl-1*H*-pyrazole (**5f**)

The compound was prepared from 1-bromo-4-isocyanobenzene (0.3 mmol, 54 mg) and methyl(phenylethynyl)selane (0.2 mmol, 39 mg) following the general procedure. Purification was performed by a preparation plate with silica gel ((silica, 30:1 petroleum ether : EtOAc) to afford 47 mg (60%) of the title compound **5f**.

**Physical state:** yellow liquid.

**<sup>1</sup>H NMR (600 MHz, CDCl<sub>3</sub>, 25 °C):** δ 7.85-7.83 (m, 2H), 7.63-7.60 (m, 2H), 7.55-7.53 (m, 2H), 7.42-7.40 (m, 2H), 7.36-7.33 (m, 1H), 6.73 (s, 1H), 2.30 (s, 3H).

**<sup>13</sup>C NMR (150 MHz, CDCl<sub>3</sub>, 25 °C):** δ 153.1, 139.3, 132.7, 132.3, 130.4, 128.8, 128.4, 126.5, 125.9, 121.8, 109.0, 9.6.

**HRMS (ESI) m/z:** [M+H]<sup>+</sup> Calcd for C<sub>16</sub>H<sub>14</sub>BrN<sub>5</sub>Se 392.9500; Found 392.9480.

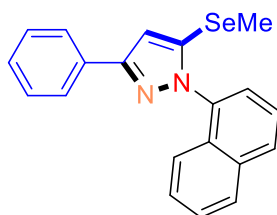

### 5-(methylselanyl)-1-(naphthalen-1-yl)-3-phenyl-1*H*-pyrazole (**5g**)

The compound was prepared from 1-isocyanonaphthalene (0.3 mmol, 46 mg) and methyl(phenylethynyl)selane (0.2 mmol, 39 mg) following the general procedure. Purification was performed by a preparation plate with silica gel ((silica, 30:1 petroleum ether : EtOAc) to afford 49 mg (67%) of the title compound **5g**.

**Physical state:** yellow liquid.

**<sup>1</sup>H NMR (600 MHz, CDCl<sub>3</sub>, 25 °C):** δ 8.02-7.97 (m, 1H), 7.96-7.88 (m, 3H), 7.61-7.60 (m, 1H), 7.59-7.50 (m, 2H), 7.49-7.40 (m, 4H), 7.37-7.32 (m, 1H), 6.85 (s, 1H), 2.17 (s, 3H).

**<sup>13</sup>C NMR (150 MHz, CDCl<sub>3</sub>, 25 °C):** δ 152.9, 136.6, 134.4, 133.0, 132.6, 130.8, 130.0, 128.8, 128.2, 127.5, 126.9, 125.9, 125.7, 125.1, 123.4, 107.8, 9.4.

**HRMS (ESI) m/z:** [M+H]<sup>+</sup> Calcd for C<sub>20</sub>H<sub>17</sub>N<sub>5</sub>Se 365.0551; Found 365.0547.

## 7. Control experiments

### (1) Radical trapping reactions

To a solution of thioalkyne **1a** (0.2 mmol, 43 mg) isocyanide **2a** (0.3 mmol, 54 mg),

$\text{Pd}_2(\text{dpa})_3$  (0.02 mmol, 19 mg) and 2,2,6,6-tetramethylpiperidinoxy (TEMPO, 0.3 mmol, 47 mg) or butylated hydroxytoluene (BHT, 0.3 mmol, 66 mg) in THF (2 mL) was stirred at 70 °C (heating oil temperature) in a sealed tube under air atmosphere. After 2 h, the resulting mixture was cooled down to room temperature and then filtered to a round bottom flask by a short pad of silica gel (eluent:  $\text{CH}_2\text{Cl}_2$ ). Volatiles were evaporated under reduced pressure. The crude products were directly used in the next reaction with without further purification. The above crude mixture was dissolved in DCE (2 mL) and then  $\text{Sc}(\text{OTf})_3$  (0.02 mmol, 10 mg),  $\text{CuI}$  (0.02 mmol, 4 mg) and  $\text{TMSN}_3$  (0.3 mmol, 35 mg) was added. The reaction mixture was stired at 70 °C (heating mantle temperature). After 16 h, the resulting mixture is filtered by a short pad of silica gel (eluent:  $\text{CH}_2\text{Cl}_2$ ) and concentrated in vacuo then the crude product was purified by column chromatography using PE/EA (25:1-20:1) to provide the corresponding compounds **3aa**. With TEMPO, the yield of **3aa** was 67%. And with BHT, the yield of **3aa** was 68%.

## (2) Isotopic labeling experiments

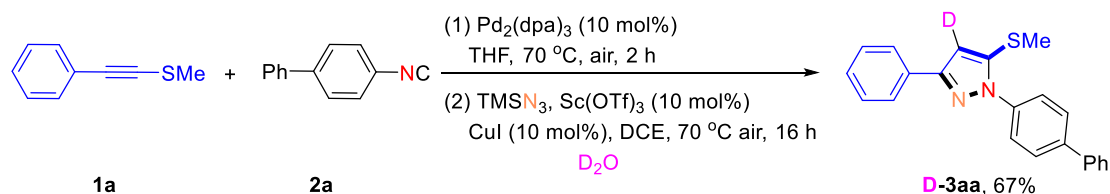

A mixture of thioalkyne **1a** (0.2 mmol, 43 mg), isocyanide **2a** (0.3 mmol, 54 mg) and  $\text{Pd}_2(\text{dpa})_3$  (0.02 mmol, 19 mg) in THF (8 mL) was stirred at 70 °C (heating oil temperature) in a sealed tube under air atmosphere. After 2 h, the resulting mixture was cooled down to room temperature and then filtered to a round bottom flask by a short pad of silica gel (eluent:  $\text{CH}_2\text{Cl}_2$ ). Volatiles were evaporated under reduced pressure. The crude products were directly used in the next reaction with without further purification. The above crude mixture was dissolved in DCE (2 mL) and then  $\text{Sc}(\text{OTf})_3$  (0.02 mmol, 10 mg),  $\text{CuI}$  (0.02 mmol, 4 mg),  $\text{D}_2\text{O}$  (0.4 mmol, 8 mg) and  $\text{TMSN}_3$  (0.3 mmol, 35 mg) was added. The reaction mixture was stired at 70 °C (heating mantle temperature). After 16 h, the resulting mixture is filtered by a short pad of silica gel (eluent:  $\text{CH}_2\text{Cl}_2$ ) and concentrated in vacuo then the crude product was purified by

column chromatography using PE/EA (25:1-20:1) to provide the corresponding compounds D-**3aa** (46 mg, 67%).

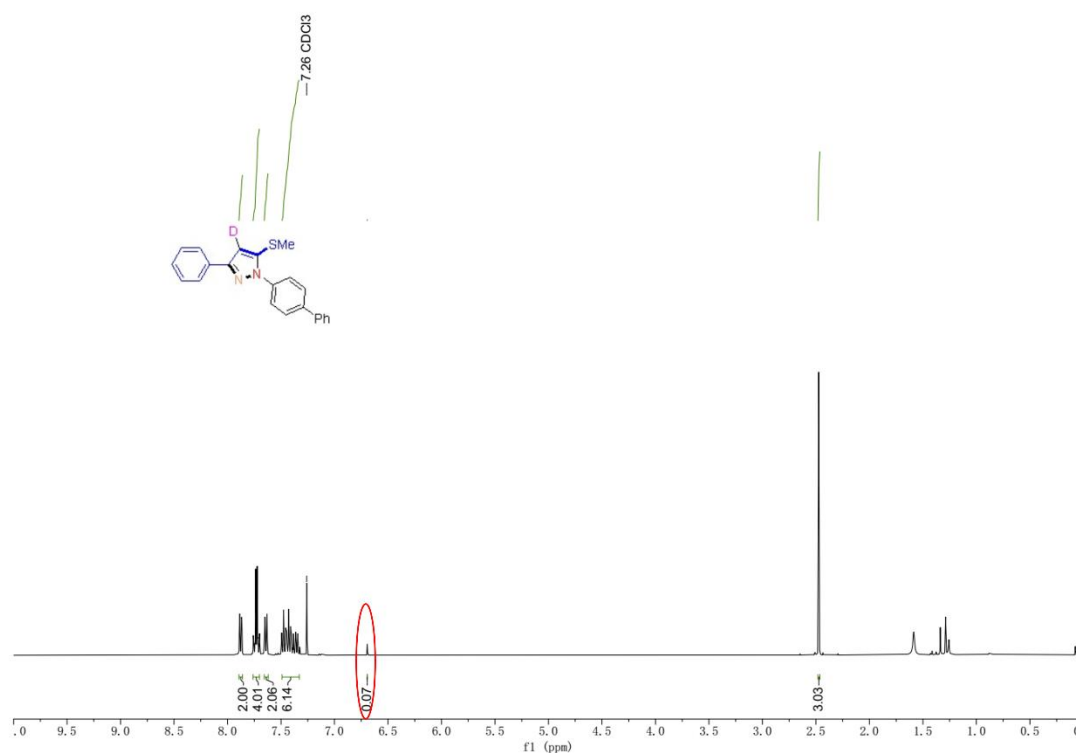

**Figure S1.**  $^1\text{H}$  NMR (400 MHz,  $\text{CDCl}_3$ ) spectrum of D-**3aa**

### (3) Capture the intermediate alkynyl imine

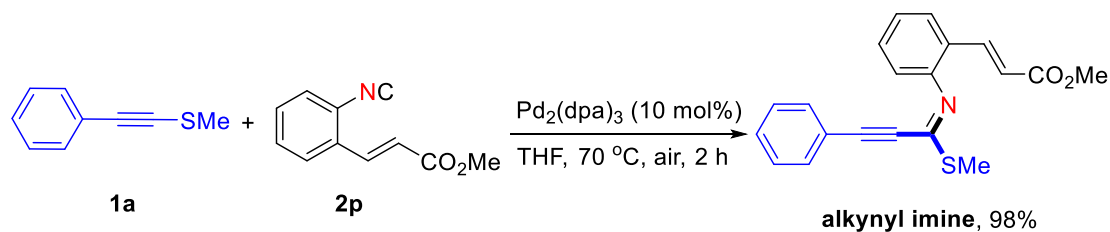

A mixture of thioalkyne **1a** (0.2 mmol, 43 mg), isocyanide **2p** (0.3 mmol, 54 mg) and  $\text{Pd}_2(\text{dpa})_3$  (0.02 mmol, 19 mg) in THF (8 mL) was stirred at 70 °C (heating oil temperature) in a sealed tube under air atmosphere. After 2 h, the resulting solution was cooled to room temperature and then filtered to a round bottom flask by a short pad of silica gel (eluent:  $\text{CH}_2\text{Cl}_2$ ). The  $\text{CH}_2\text{Cl}_2$  were removed in vacuo, then the crude product was purified by column chromatography using PE/EA (40:1) to provide the desired product **alkynyl imine** (66 mg) in 98% isolated yield.

**Physical state:** yellow solid.

**Mp:** 76- 78 °C.

**$^1\text{H}$  NMR (600 MHz,  $\text{CDCl}_3$ , 25 °C):**  $\delta$  7.95 (d,  $J = 16.1$  Hz, 1H), 7.64-7.58 (m, 1H), 7.35 (dd,  $J = 9.3, 5.2$  Hz, 2H), 7.26 (q,  $J = 3.2, 2.8$  Hz, 4H), 7.16 (t,  $J = 7.6$  Hz, 1H), 7.08 (d,  $J = 8.0$  Hz, 1H), 6.40 (d,  $J = 16.1$  Hz, 1H), 3.77 (s, 3H), 2.63 (s, 3H).

**$^{13}\text{C}$  NMR (150 MHz,  $\text{CDCl}_3$ , 25 °C):**  $\delta$  167.8, 150.7, 150.1, 141.7, 132.4, 130.4, 130.2, 128.5, 127.4, 127.0, 125.1, 121.1, 120.6, 118.2, 96.8, 81.9, 51.7, 14.2.

**HRMS (ESI)  $m/z$ :**  $[\text{M}+\text{H}]^+$  Calcd for  $\text{C}_{20}\text{H}_{18}\text{NO}_2\text{S}^+$  336.1053; Found 336.1062.

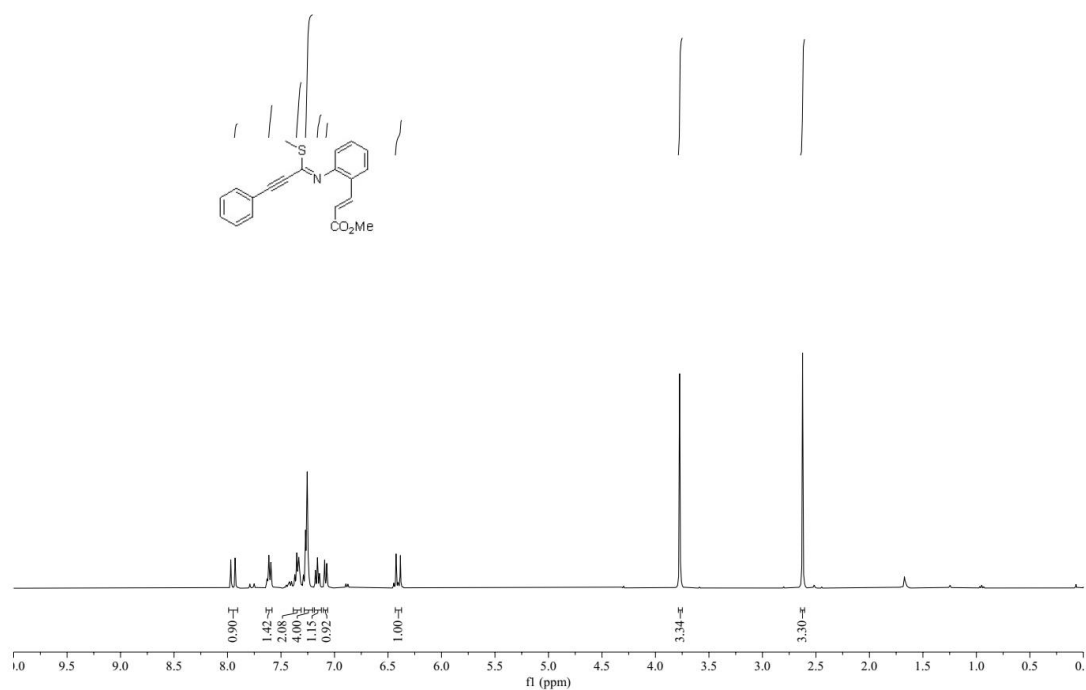

**Figure S2.  $^1\text{H}$  NMR (400 MHz,  $\text{CDCl}_3$ ) spectrum of alkyne imine**

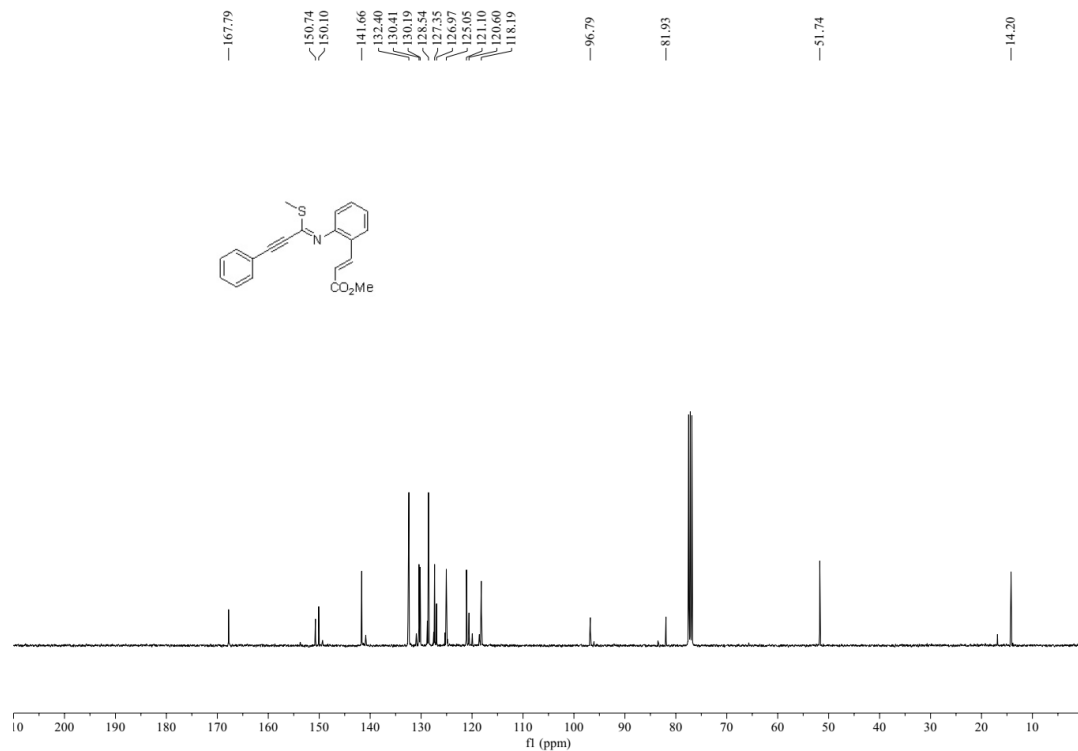

**Figure S3.** <sup>13</sup>C NMR (100 MHz, CDCl<sub>3</sub>) spectrum of alkynyl imine

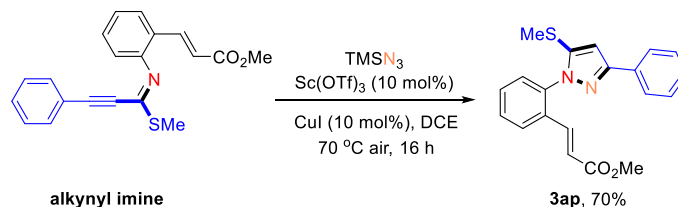

The **alkynyl imine** (0.197 mmol, 66 mg) was dissolved in DCE (2 mL) and then Sc(OTf)<sub>3</sub> (0.02 mmol, 10 mg), CuI (0.02 mmol, 4 mg) and TMSN<sub>3</sub> (0.3 mmol, 35 mg) was added. The reaction mixture was stirred at 70 °C (heating mantle temperature). After 16 h, the resulting mixture is filtered by a short pad of silica gel (eluent: CH<sub>2</sub>Cl<sub>2</sub>) and concentrated in vacuo then the crude product was purified by column chromatography using PE/EA (25:1-20:1) to provide the corresponding compounds **3ap** (48 mg, 70%).

## 8. Crystal data and structure refinement of product **3ja**

Single crystal of compound **3ja** was obtained by slow evaporation from CH<sub>2</sub>Cl<sub>2</sub> solution.

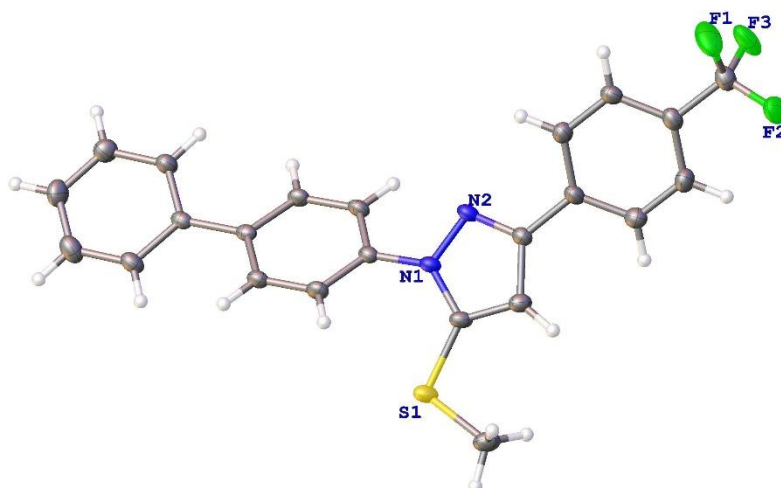

**Figure S5.** Crystal data and structure refinement of product **3ja** (with thermal ellipsoids shown at the 50% probability level)

**Table S6. Crystal data and structure refinement for 3ja.**

|                                    |                                                                 |
|------------------------------------|-----------------------------------------------------------------|
| Identification code                | 4227                                                            |
| Empirical formula                  | C <sub>23</sub> H <sub>17</sub> F <sub>3</sub> N <sub>2</sub> S |
| Formula weight                     | 410.44                                                          |
| Temperature/K                      | 150.00(10)                                                      |
| Crystal system                     | monoclinic                                                      |
| Space group                        | P2 <sub>1</sub>                                                 |
| a/Å                                | 11.4446(7)                                                      |
| b/Å                                | 7.4929(4)                                                       |
| c/Å                                | 22.0408(12)                                                     |
| α/°                                | 90                                                              |
| β/°                                | 92.240(5)                                                       |
| γ/°                                | 90                                                              |
| Volume/Å <sup>3</sup>              | 1888.63(18)                                                     |
| Z                                  | 4                                                               |
| ρ <sub>calc</sub> /cm <sup>3</sup> | 1.444                                                           |
| μ/mm <sup>-1</sup>                 | 1.883                                                           |
| F(000)                             | 848.0                                                           |
| Crystal size/mm <sup>3</sup>       | 0.16 × 0.13 × 0.11                                              |
| Radiation                          | Cu Kα (λ = 1.54184)                                             |
| 2θ range for data collection/°     | 4.012 to 148.068                                                |
| Index ranges                       | -14 ≤ h ≤ 13, -9 ≤ k ≤ 9, -21 ≤ l ≤ 27                          |
| Reflections collected              | 13984                                                           |
| Independent reflections            | 7212 [R <sub>int</sub> = 0.0552, R <sub>sigma</sub> = 0.0484]   |
| Data/restraints/parameters         | 7212/52/554                                                     |

|                                                |                                  |
|------------------------------------------------|----------------------------------|
| Goodness-of-fit on $F^2$                       | 1.098                            |
| Final R indexes [ $I \geq 2\sigma(I)$ ]        | $R_1 = 0.0576$ , $wR_2 = 0.1695$ |
| Final R indexes [all data]                     | $R_1 = 0.0619$ , $wR_2 = 0.1781$ |
| Largest diff. peak/hole / $e \text{ \AA}^{-3}$ | 0.46/-0.30                       |
| Flack parameter                                | 0.250(15)                        |

### Crystal structure determination of 3ja

**Crystal Data** for  $C_{23}H_{17}F_3N_2S$  ( $M = 410.44$  g/mol): monoclinic, space group  $P2_1$  (no. 4),  $a = 11.4446(7)$   $\text{\AA}$ ,  $b = 7.4929(4)$   $\text{\AA}$ ,  $c = 22.0408(12)$   $\text{\AA}$ ,  $\beta = 92.240(5)^\circ$ ,  $V = 1888.63(18)$   $\text{\AA}^3$ ,  $Z = 4$ ,  $T = 150.00(10)$  K,  $\mu(\text{Cu K}\alpha) = 1.883$   $\text{mm}^{-1}$ ,  $D_{\text{calc}} = 1.444$   $\text{g/cm}^3$ , 13984 reflections measured ( $4.012^\circ \leq 2\theta \leq 148.068^\circ$ ), 7212 unique ( $R_{\text{int}} = 0.0552$ ,  $R_{\text{sigma}} = 0.0484$ ) which were used in all calculations. The final  $R_1$  was 0.0576 ( $I > 2\sigma(I)$ ) and  $wR_2$  was 0.1781 (all data).

**Table S7. Fractional Atomic Coordinates ( $\times 10^4$ ) and Equivalent Isotropic Displacement Parameters ( $\text{\AA}^2 \times 10^3$ ) for 3ja.  $U_{\text{eq}}$  is defined as 1/3 of the trace of the orthogonalised  $U_{ij}$  tensor.**

| Atom | $x$        | $y$     | $z$        | $U_{\text{eq}}$ |
|------|------------|---------|------------|-----------------|
| S1   | 2152.7(10) | 2184(2) | 7334.8(6)  | 34.8(3)         |
| F1   | 10111(4)   | 4927(6) | 9305(2)    | 64.6(13)        |
| F2   | 9298(3)    | 3407(7) | 9992.6(15) | 53.6(11)        |
| F3   | 10331(3)   | 2107(7) | 9340.7(17) | 57.0(11)        |
| N1   | 4429(3)    | 2373(6) | 6998.1(18) | 25.2(8)         |
| N2   | 5566(3)    | 2446(6) | 7213.8(19) | 28.2(9)         |
| C1   | 4213(4)    | 2309(7) | 6360(2)    | 23.1(9)         |
| C2   | 4953(4)    | 1330(7) | 6001(2)    | 26.8(10)        |
| C3   | 4759(4)    | 1287(7) | 5380(2)    | 26.1(10)        |
| C4   | 3820(4)    | 2192(7) | 5092(2)    | 22.3(9)         |
| C5   | 3085(4)    | 3151(7) | 5466(2)    | 27.0(10)        |
| C6   | 3270(4)    | 3218(7) | 6088(2)    | 28.3(10)        |
| C7   | 3628(4)    | 2173(7) | 4423(2)    | 23.5(9)         |
| C8   | 2577(4)    | 2780(8) | 4151(2)    | 32.0(11)        |
| C9   | 2424(5)    | 2837(9) | 3527(3)    | 41.0(13)        |
| C10  | 3314(5)    | 2326(9) | 3155(2)    | 40.0(13)        |
| C11  | 4354(5)    | 1719(8) | 3412(2)    | 35.5(12)        |
| C12  | 4509(4)    | 1647(8) | 4040(2)    | 30.6(11)        |
| C13  | 3665(4)    | 2333(8) | 7464(2)    | 28.7(10)        |
| C14  | 4330(4)    | 2389(8) | 7993(2)    | 30.0(11)        |
| C15  | 5499(4)    | 2457(7) | 7813(2)    | 26.0(10)        |
| C16  | 6553(4)    | 2637(8) | 8211(2)    | 29.8(11)        |
| C17  | 6540(4)    | 2093(8) | 8813(2)    | 33.0(11)        |
| C18  | 7502(5)    | 2361(9) | 9203(2)    | 35.8(12)        |
| C19  | 8491(4)    | 3185(8) | 8993(2)    | 31.7(11)        |

|     |            |          |            |          |
|-----|------------|----------|------------|----------|
| C20 | 8529(4)    | 3711(8)  | 8389(2)    | 31.7(11) |
| C21 | 7559(4)    | 3442(8)  | 8001(2)    | 29.8(11) |
| C22 | 1709(5)    | 2387(9)  | 8103(2)    | 38.8(13) |
| C23 | 9534(5)    | 3421(8)  | 9409(2)    | 34.1(12) |
| S2  | -277.1(11) | 7951(2)  | 7705.0(6)  | 37.5(4)  |
| F5  | 7547(10)   | 6044(11) | 9968(8)    | 58(3)    |
| F6  | 7190(20)   | 6330(30) | 10275(11)  | 78(7)    |
| F7  | 6792(10)   | 8050(40) | 10481(4)   | 95(8)    |
| F8  | 6979(12)   | 9130(20) | 10292(10)  | 61(5)    |
| F9  | 7876(13)   | 8670(30) | 9725(10)   | 81(6)    |
| F10 | 8026(16)   | 7990(40) | 9660(10)   | 73(7)    |
| N3  | 1989(3)    | 7271(6)  | 7451.7(17) | 26.0(8)  |
| N4  | 3107(3)    | 7174(6)  | 7691.6(18) | 26.3(8)  |
| C24 | 1221(4)    | 7184(7)  | 4873(2)    | 24.4(9)  |
| C25 | 188(4)     | 6521(8)  | 4597(2)    | 31.4(11) |
| C26 | 22(5)      | 6468(9)  | 3972(3)    | 36.7(12) |
| C27 | 888(5)     | 7052(8)  | 3602(2)    | 34.0(11) |
| C28 | 1920(5)    | 7745(8)  | 3862(2)    | 35.4(12) |
| C29 | 2078(4)    | 7788(8)  | 4488(2)    | 32.7(12) |
| C30 | 1416(4)    | 7207(7)  | 5543(2)    | 23.8(9)  |
| C31 | 2358(4)    | 8139(7)  | 5820(2)    | 25.7(10) |
| C32 | 2557(4)    | 8150(7)  | 6443(2)    | 26.5(10) |
| C33 | 1795(4)    | 7228(7)  | 6810(2)    | 23.8(9)  |
| C34 | 853(4)     | 6301(7)  | 6549(2)    | 25.6(10) |
| C35 | 675(4)     | 6286(7)  | 5927(2)    | 25.5(10) |
| C36 | 1201(4)    | 7568(7)  | 7892(2)    | 26.7(10) |
| C37 | 1824(4)    | 7619(8)  | 8434(2)    | 29.9(11) |
| C38 | 3001(4)    | 7389(8)  | 8283(2)    | 27.6(10) |
| C39 | 4033(4)    | 7433(7)  | 8700(2)    | 28.4(11) |
| C40 | 3939(4)    | 8056(9)  | 9288(2)    | 35.9(12) |
| C41 | 4894(5)    | 8156(9)  | 9687(2)    | 36.3(12) |
| C42 | 5979(4)    | 7603(7)  | 9498(2)    | 29.6(11) |
| C43 | 5130(5)    | 6872(8)  | 8515(2)    | 34.5(12) |
| C44 | 6094(4)    | 6960(9)  | 8913(2)    | 35.7(12) |
| C45 | -767(5)    | 8708(9)  | 8428(3)    | 41.3(14) |
| C46 | 7033(5)    | 7668(8)  | 9920(2)    | 33.4(9)  |

**Table S8. Anisotropic Displacement Parameters ( $\text{\AA}^2 \times 10^3$ ) for 3ja. The Anisotropic displacement factor exponent takes the form:  $-2\pi^2[\text{h}^2\text{a}^*2\text{U}_{11}+2\text{hka}^*\text{b}^*\text{U}_{12}+\dots]$ .**

| Atom | U <sub>11</sub> | U <sub>22</sub> | U <sub>33</sub> | U <sub>23</sub> | U <sub>13</sub> | U <sub>12</sub> |
|------|-----------------|-----------------|-----------------|-----------------|-----------------|-----------------|
| S1   | 19.5(5)         | 51.1(8)         | 33.9(6)         | -4.9(6)         | 3.5(4)          | -2.5(5)         |



|     |          |         |          |          |           |          |
|-----|----------|---------|----------|----------|-----------|----------|
| F1  | 60(3)    | 64(3)   | 68(3)    | 11(2)    | -31(2)    | -24(2)   |
| F2  | 41.5(19) | 87(3)   | 31.3(16) | -8.3(18) | -6.0(14)  | 3(2)     |
| F3  | 37.0(18) | 80(3)   | 53(2)    | -17(2)   | -17.0(15) | 24(2)    |
| N1  | 15.4(17) | 31(2)   | 29.5(19) | 0.1(17)  | 2.1(14)   | 0.4(17)  |
| N2  | 15.2(17) | 38(2)   | 32(2)    | -1.4(18) | -1.1(14)  | 0.6(17)  |
| C1  | 16.9(19) | 25(2)   | 27(2)    | 1(2)     | 0.5(16)   | 0(2)     |
| C2  | 16(2)    | 31(3)   | 33(2)    | 0(2)     | 0.0(18)   | 3.6(19)  |
| C3  | 20(2)    | 28(3)   | 31(2)    | 0(2)     | 4.3(18)   | 5.6(19)  |
| C4  | 17(2)    | 21(2)   | 29(2)    | 2(2)     | 2.4(16)   | -0.4(19) |
| C5  | 19(2)    | 31(3)   | 31(2)    | 1(2)     | 1.7(17)   | 3.7(19)  |
| C6  | 20(2)    | 32(3)   | 33(2)    | 1(2)     | 4.1(18)   | 7(2)     |
| C7  | 18(2)    | 22(2)   | 31(2)    | 0(2)     | 0.4(16)   | 0.2(18)  |
| C8  | 22(2)    | 38(3)   | 36(3)    | -4(2)    | -4.2(19)  | 3(2)     |
| C9  | 37(3)    | 45(3)   | 40(3)    | -4(3)    | -9(2)     | 9(3)     |
| C10 | 45(3)    | 48(3)   | 26(2)    | -4(3)    | -5(2)     | -2(3)    |
| C11 | 35(3)    | 40(3)   | 32(3)    | -5(2)    | 4(2)      | 2(2)     |
| C12 | 22(2)    | 40(3)   | 29(3)    | -2(2)    | -0.1(19)  | 4(2)     |
| C13 | 18(2)    | 37(3)   | 31(2)    | -3(2)    | 4.5(17)   | -2(2)    |
| C14 | 24(2)    | 37(3)   | 30(2)    | -2(2)    | 4.6(18)   | -2(2)    |
| C15 | 20(2)    | 30(3)   | 28(2)    | 1.9(19)  | 0.1(17)   | 2.8(19)  |
| C16 | 20(2)    | 42(3)   | 28(2)    | 0(2)     | -0.9(17)  | 4(2)     |
| C17 | 27(2)    | 38(3)   | 34(3)    | 3(2)     | 1.9(19)   | 1(2)     |
| C18 | 36(3)    | 47(3)   | 24(2)    | 3(2)     | 0.5(19)   | 3(3)     |
| C19 | 28(2)    | 38(3)   | 30(2)    | -1(2)    | -3.1(19)  | 7(2)     |
| C20 | 21(2)    | 42(3)   | 32(3)    | 0(2)     | 1.6(19)   | 3(2)     |
| C21 | 28(2)    | 37(3)   | 24(2)    | 0(2)     | 2.1(18)   | 3(2)     |
| C22 | 29(3)    | 48(3)   | 40(3)    | -3(3)    | 10(2)     | 0(3)     |
| C23 | 33(3)    | 37(3)   | 32(3)    | -2(2)    | -5(2)     | 4(2)     |
| S2  | 19.5(6)  | 60.0(9) | 33.1(6)  | -0.9(6)  | 1.2(4)    | 4.3(6)   |
| F5  | 54(5)    | 46(3)   | 71(7)    | -2(3)    | -35(5)    | 12(3)    |
| F6  | 94(13)   | 57(7)   | 80(12)   | 33(8)    | -52(11)   | -29(7)   |
| F7  | 47(5)    | 200(20) | 36(3)    | -34(6)   | -14(3)    | 37(9)    |
| F8  | 46(6)    | 68(6)   | 66(8)    | -32(6)   | -24(6)    | 8(5)     |
| F9  | 45(5)    | 97(10)  | 98(11)   | 54(9)    | -38(5)    | -40(6)   |
| F10 | 33(4)    | 150(20) | 35(6)    | 4(9)     | 0(4)      | -12(8)   |
| N3  | 15.8(17) | 33(2)   | 28.9(19) | 0.9(19)  | -0.4(14)  | -0.8(18) |
| N4  | 17.9(18) | 30(2)   | 31(2)    | -2.3(18) | -2.0(14)  | 0.6(18)  |
| C24 | 19(2)    | 24(2)   | 30(2)    | 1(2)     | 1.7(17)   | 1.0(19)  |
| C25 | 26(2)    | 36(3)   | 32(3)    | 3(2)     | -0.1(19)  | -2(2)    |
| C26 | 30(3)    | 44(3)   | 36(3)    | 1(2)     | -4(2)     | -4(2)    |

|     |       |       |       |         |          |          |
|-----|-------|-------|-------|---------|----------|----------|
| C27 | 38(3) | 39(3) | 24(2) | 2(2)    | -3(2)    | 1(2)     |
| C28 | 29(3) | 45(3) | 32(3) | 5(2)    | 6(2)     | 0(2)     |
| C29 | 22(2) | 45(3) | 31(2) | 2(2)    | 2.1(18)  | -3(2)    |
| C30 | 18(2) | 24(2) | 29(2) | -3(2)   | 2.6(16)  | 0.8(19)  |
| C31 | 22(2) | 24(2) | 32(2) | -1(2)   | 4.2(17)  | -4.6(19) |
| C32 | 18(2) | 27(2) | 34(2) | 0(2)    | -0.3(17) | -4.8(19) |
| C33 | 19(2) | 27(2) | 24(2) | -2(2)   | 1.6(16)  | 0(2)     |
| C34 | 22(2) | 24(2) | 31(2) | 0.8(19) | 2.1(18)  | -1.9(19) |
| C35 | 18(2) | 26(2) | 32(3) | -3(2)   | 1.5(18)  | -4.5(19) |
| C36 | 17(2) | 32(3) | 31(2) | 2(2)    | 0.9(17)  | 2.4(18)  |
| C37 | 25(2) | 40(3) | 26(2) | 0(2)    | 2.6(18)  | 0(2)     |
| C38 | 23(2) | 30(3) | 29(2) | -1(2)   | 0.0(17)  | -1(2)    |
| C39 | 25(2) | 32(3) | 28(2) | 0(2)    | 0.7(18)  | -2(2)    |
| C40 | 26(2) | 51(3) | 31(3) | -2(2)   | 4.2(19)  | 3(2)     |
| C41 | 32(3) | 51(4) | 26(2) | -3(2)   | 1.3(19)  | 4(3)     |
| C42 | 28(2) | 30(3) | 31(2) | 0.0(19) | -2.3(17) | -1.2(19) |
| C43 | 27(2) | 47(3) | 29(2) | -6(2)   | 0.3(19)  | 3(2)     |
| C44 | 24(2) | 50(4) | 32(3) | -7(2)   | 0.0(19)  | 4(2)     |
| C45 | 27(3) | 53(4) | 44(3) | -8(3)   | 10(2)    | 6(3)     |
| C46 | 32(2) | 37(2) | 31(2) | 0.8(16) | -4.5(15) | -2.1(17) |

**Table S9. Bond Lengths for 3ja.**

| Atom | Atom | Length/Å | Atom | Atom | Length/Å  |
|------|------|----------|------|------|-----------|
| S1   | C13  | 1.746(5) | F5   | C46  | 1.354(9)  |
| S1   | C22  | 1.793(5) | F6   | C46  | 1.278(12) |
| F1   | C23  | 1.332(7) | F7   | C46  | 1.310(9)  |
| F2   | C23  | 1.325(6) | F8   | C46  | 1.372(11) |
| F3   | C23  | 1.354(7) | F9   | C46  | 1.308(11) |
| N1   | N2   | 1.369(5) | F10  | C46  | 1.316(13) |
| N1   | C1   | 1.418(6) | N3   | N4   | 1.367(5)  |
| N1   | C13  | 1.374(6) | N3   | C33  | 1.424(6)  |
| N2   | C15  | 1.325(6) | N3   | C36  | 1.368(6)  |
| C1   | C2   | 1.392(6) | N4   | C38  | 1.324(6)  |
| C1   | C6   | 1.392(7) | C24  | C25  | 1.400(7)  |
| C2   | C3   | 1.379(7) | C24  | C29  | 1.398(6)  |
| C3   | C4   | 1.401(6) | C24  | C30  | 1.484(6)  |
| C4   | C5   | 1.399(6) | C25  | C26  | 1.384(7)  |
| C4   | C7   | 1.482(6) | C26  | C27  | 1.379(8)  |
| C5   | C6   | 1.380(7) | C27  | C28  | 1.394(8)  |
| C7   | C8   | 1.399(7) | C28  | C29  | 1.385(7)  |
| C7   | C12  | 1.396(7) | C30  | C31  | 1.404(7)  |

|     |     |          |     |     |          |
|-----|-----|----------|-----|-----|----------|
| C8  | C9  | 1.381(8) | C30 | C35 | 1.403(6) |
| C9  | C10 | 1.385(8) | C31 | C32 | 1.383(7) |
| C10 | C11 | 1.376(8) | C32 | C33 | 1.395(7) |
| C11 | C12 | 1.390(7) | C33 | C34 | 1.388(7) |
| C13 | C14 | 1.368(7) | C34 | C35 | 1.378(7) |
| C14 | C15 | 1.411(6) | C36 | C37 | 1.369(7) |
| C15 | C16 | 1.471(7) | C37 | C38 | 1.411(6) |
| C16 | C17 | 1.388(7) | C38 | C39 | 1.467(7) |
| C16 | C21 | 1.394(7) | C39 | C40 | 1.386(7) |
| C17 | C18 | 1.384(8) | C39 | C43 | 1.399(7) |
| C18 | C19 | 1.385(8) | C40 | C41 | 1.378(7) |
| C19 | C20 | 1.389(7) | C41 | C42 | 1.388(7) |
| C19 | C23 | 1.487(7) | C42 | C44 | 1.389(7) |
| C20 | C21 | 1.389(7) | C42 | C46 | 1.496(7) |
| S2  | C36 | 1.749(5) | C43 | C44 | 1.384(7) |
| S2  | C45 | 1.802(6) |     |     |          |

**Table S10. Bond Angles for 3ja.**

| Atom | Atom | Atom | Angle/°  | Atom | Atom | Atom | Angle/°  |
|------|------|------|----------|------|------|------|----------|
| C13  | S1   | C22  | 99.0(2)  | C36  | N3   | C33  | 128.8(4) |
| N2   | N1   | C1   | 118.2(3) | C38  | N4   | N3   | 104.8(4) |
| N2   | N1   | C13  | 111.5(4) | C25  | C24  | C30  | 121.9(4) |
| C13  | N1   | C1   | 130.3(4) | C29  | C24  | C25  | 116.8(4) |
| C15  | N2   | N1   | 104.8(4) | C29  | C24  | C30  | 121.3(4) |
| C2   | C1   | N1   | 119.7(4) | C26  | C25  | C24  | 121.6(5) |
| C2   | C1   | C6   | 119.4(4) | C27  | C26  | C25  | 120.4(5) |
| C6   | C1   | N1   | 120.9(4) | C26  | C27  | C28  | 119.5(5) |
| C3   | C2   | C1   | 120.0(4) | C29  | C28  | C27  | 119.6(5) |
| C2   | C3   | C4   | 122.0(4) | C28  | C29  | C24  | 122.0(5) |
| C3   | C4   | C7   | 121.8(4) | C31  | C30  | C24  | 121.3(4) |
| C5   | C4   | C3   | 116.7(4) | C35  | C30  | C24  | 121.6(4) |
| C5   | C4   | C7   | 121.5(4) | C35  | C30  | C31  | 117.0(4) |
| C6   | C5   | C4   | 122.1(4) | C32  | C31  | C30  | 121.8(4) |
| C5   | C6   | C1   | 119.8(4) | C31  | C32  | C33  | 119.4(4) |
| C8   | C7   | C4   | 121.0(4) | C32  | C33  | N3   | 119.2(4) |
| C12  | C7   | C4   | 121.4(4) | C34  | C33  | N3   | 120.7(4) |
| C12  | C7   | C8   | 117.5(4) | C34  | C33  | C32  | 120.1(4) |
| C9   | C8   | C7   | 120.7(5) | C35  | C34  | C33  | 119.9(4) |
| C8   | C9   | C10  | 120.9(5) | C34  | C35  | C30  | 121.8(4) |
| C11  | C10  | C9   | 119.5(5) | N3   | C36  | S2   | 121.2(4) |
| C10  | C11  | C12  | 119.8(5) | N3   | C36  | C37  | 106.8(4) |

|     |     |     |          |     |     |     |           |
|-----|-----|-----|----------|-----|-----|-----|-----------|
| C11 | C12 | C7  | 121.6(5) | C37 | C36 | S2  | 131.8(4)  |
| N1  | C13 | S1  | 122.4(4) | C36 | C37 | C38 | 105.1(4)  |
| C14 | C13 | S1  | 131.0(4) | N4  | C38 | C37 | 111.8(4)  |
| C14 | C13 | N1  | 106.6(4) | N4  | C38 | C39 | 121.1(4)  |
| C13 | C14 | C15 | 105.3(4) | C37 | C38 | C39 | 127.0(4)  |
| N2  | C15 | C14 | 111.9(4) | C40 | C39 | C38 | 120.2(4)  |
| N2  | C15 | C16 | 121.1(4) | C40 | C39 | C43 | 118.4(5)  |
| C14 | C15 | C16 | 126.9(4) | C43 | C39 | C38 | 121.4(4)  |
| C17 | C16 | C15 | 120.3(4) | C41 | C40 | C39 | 121.9(5)  |
| C17 | C16 | C21 | 119.0(5) | C40 | C41 | C42 | 119.2(5)  |
| C21 | C16 | C15 | 120.7(4) | C41 | C42 | C44 | 120.1(5)  |
| C18 | C17 | C16 | 120.8(5) | C41 | C42 | C46 | 120.8(5)  |
| C17 | C18 | C19 | 119.9(5) | C44 | C42 | C46 | 119.1(5)  |
| C18 | C19 | C20 | 120.2(5) | C44 | C43 | C39 | 120.3(5)  |
| C18 | C19 | C23 | 119.6(5) | C43 | C44 | C42 | 120.1(5)  |
| C20 | C19 | C23 | 120.2(5) | F5  | C46 | C42 | 111.0(6)  |
| C21 | C20 | C19 | 119.6(5) | F6  | C46 | F8  | 105.6(10) |
| C20 | C21 | C16 | 120.6(5) | F6  | C46 | F10 | 107.8(14) |
| F1  | C23 | F3  | 104.9(5) | F6  | C46 | C42 | 116.6(8)  |
| F1  | C23 | C19 | 112.7(5) | F7  | C46 | F5  | 103.4(9)  |
| F2  | C23 | F1  | 107.1(5) | F7  | C46 | C42 | 113.6(6)  |
| F2  | C23 | F3  | 105.4(4) | F8  | C46 | C42 | 110.1(7)  |
| F2  | C23 | C19 | 114.1(5) | F9  | C46 | F5  | 102.5(10) |
| F3  | C23 | C19 | 111.9(5) | F9  | C46 | F7  | 111.7(13) |
| C36 | S2  | C45 | 100.1(3) | F9  | C46 | C42 | 113.6(10) |
| N4  | N3  | C33 | 119.4(3) | F10 | C46 | F8  | 100.0(13) |
| N4  | N3  | C36 | 111.6(4) | F10 | C46 | C42 | 115.1(12) |

**Table S11. Torsion Angles for 3ja.**

| A  | B   | C   | D   | Angle/°   | A   | B   | C   | D   | Angle/°   |
|----|-----|-----|-----|-----------|-----|-----|-----|-----|-----------|
| S1 | C13 | C14 | C15 | 178.3(5)  | N3  | C33 | C34 | C35 | 179.6(4)  |
| N1 | N2  | C15 | C14 | 0.1(6)    | N3  | C36 | C37 | C38 | 1.6(6)    |
| N1 | N2  | C15 | C16 | -176.4(5) | N4  | N3  | C33 | C32 | -39.7(7)  |
| N1 | C1  | C2  | C3  | -178.9(5) | N4  | N3  | C33 | C34 | 141.1(5)  |
| N1 | C1  | C6  | C5  | 179.3(4)  | N4  | N3  | C36 | S2  | 174.2(4)  |
| N1 | C13 | C14 | C15 | -0.2(6)   | N4  | N3  | C36 | C37 | -1.6(6)   |
| N2 | N1  | C1  | C2  | 37.6(7)   | N4  | C38 | C39 | C40 | 165.2(6)  |
| N2 | N1  | C1  | C6  | -142.2(5) | N4  | C38 | C39 | C43 | -14.1(8)  |
| N2 | N1  | C13 | S1  | -178.4(4) | C24 | C25 | C26 | C27 | 0.9(9)    |
| N2 | N1  | C13 | C14 | 0.2(6)    | C24 | C30 | C31 | C32 | -179.2(5) |
| N2 | C15 | C16 | C17 | -159.5(5) | C24 | C30 | C35 | C34 | 179.9(4)  |

|               |           |               |           |
|---------------|-----------|---------------|-----------|
| N2 C15C16C21  | 24.1(8)   | C25C24C29C28  | 0.3(9)    |
| C1 N1 N2 C15  | -178.8(4) | C25C24C30C31  | -169.1(5) |
| C1 N1 C13 S1  | 0.0(8)    | C25C24C30C35  | 11.5(8)   |
| C1 N1 C13C14  | 178.6(5)  | C25C26C27C28  | -1.8(9)   |
| C1 C2 C3 C4   | -0.7(8)   | C26C27C28C29  | 2.0(9)    |
| C2 C1 C6 C5   | -0.5(8)   | C27C28C29C24  | -1.2(9)   |
| C2 C3 C4 C5   | 0.1(8)    | C29C24C25C26  | -0.1(8)   |
| C2 C3 C4 C7   | 178.7(5)  | C29C24C30C31  | 12.5(8)   |
| C3 C4 C5 C6   | 0.3(8)    | C29C24C30C35  | -166.9(5) |
| C3 C4 C7 C8   | 167.5(5)  | C30C24C25C26  | -178.6(5) |
| C3 C4 C7 C12  | -16.1(8)  | C30C24C29C28  | 178.8(5)  |
| C4 C5 C6 C1   | -0.1(8)   | C30C31C32C33  | -0.7(8)   |
| C4 C7 C8 C9   | 176.9(5)  | C31C30C35C34  | 0.6(7)    |
| C4 C7 C12C11  | -176.5(5) | C31C32C33 N3  | -178.8(4) |
| C5 C4 C7 C8   | -14.0(7)  | C31C32C33C34  | 0.4(8)    |
| C5 C4 C7 C12  | 162.4(5)  | C32C33C34C35  | 0.3(8)    |
| C6 C1 C2 C3   | 0.9(7)    | C33 N3 N4 C38 | 175.1(5)  |
| C7 C4 C5 C6   | -178.3(5) | C33 N3 C36 S2 | 0.5(8)    |
| C7 C8 C9 C10  | -1.2(9)   | C33 N3 C36C37 | -175.2(5) |
| C8 C7 C12C11  | 0.0(8)    | C33C34C35C30  | -0.8(8)   |
| C8 C9 C10C11  | 1.4(10)   | C35C30C31C32  | 0.2(7)    |
| C9 C10C11C12  | -0.9(10)  | C36 N3 N4 C38 | 0.9(6)    |
| C10C11C12 C7  | 0.2(9)    | C36 N3 C33C32 | 133.5(6)  |
| C12 C7 C8 C9  | 0.4(8)    | C36 N3 C33C34 | -45.7(8)  |
| C13 N1 N2 C15 | -0.2(6)   | C36C37C38 N4  | -1.2(7)   |
| C13 N1 C1 C2  | -140.7(6) | C36C37C38C39  | 176.6(5)  |
| C13 N1 C1 C6  | 39.4(8)   | C37C38C39C40  | -12.3(9)  |
| C13C14C15 N2  | 0.0(6)    | C37C38C39C43  | 168.4(6)  |
| C13C14C15C16  | 176.3(5)  | C38C39C40C41  | -178.5(6) |
| C14C15C16C17  | 24.6(8)   | C38C39C43C44  | 178.7(5)  |
| C14C15C16C21  | -151.8(6) | C39C40C41C42  | -0.5(10)  |
| C15C16C17C18  | -175.8(5) | C39C43C44C42  | 0.1(9)    |
| C15C16C21C20  | 176.0(5)  | C40C39C43C44  | -0.6(9)   |
| C16C17C18C19  | 0.2(9)    | C40C41C42C44  | 0.0(9)    |
| C17C16C21C20  | -0.5(8)   | C40C41C42C46  | -179.2(6) |
| C17C18C19C20  | -1.3(9)   | C41C42C44C43  | 0.2(9)    |
| C17C18C19C23  | -178.2(5) | C41C42C46 F5  | 124.3(10) |
| C18C19C20C21  | 1.5(9)    | C41C42C46 F6  | 84.7(19)  |
| C18C19C23 F1  | -145.6(6) | C41C42C46 F7  | 8.4(17)   |
| C18C19C23 F2  | -23.1(8)  | C41C42C46 F8  | -35.6(13) |

|               |           |               |            |
|---------------|-----------|---------------|------------|
| C18C19C23 F3  | 96.5(6)   | C41C42C46 F9  | -120.7(13) |
| C19C20C21C16  | -0.6(8)   | C41C42C46F10  | -147.6(16) |
| C20C19C23 F1  | 37.5(7)   | C43C39C40C41  | 0.8(9)     |
| C20C19C23 F2  | 160.0(5)  | C44C42C46 F5  | -54.9(11)  |
| C20C19C23 F3  | -80.4(7)  | C44C42C46 F6  | -94.5(19)  |
| C21C16C17C18  | 0.7(9)    | C44C42C46 F7  | -170.8(16) |
| C22 S1 C13 N1 | -175.3(5) | C44C42C46 F8  | 145.2(12)  |
| C22 S1 C13C14 | 6.4(6)    | C44C42C46 F9  | 60.1(14)   |
| C23C19C20C21  | 178.4(5)  | C44C42C46F10  | 33.2(17)   |
| S2 C36C37C38  | -173.5(4) | C45 S2 C36 N3 | -168.2(5)  |
| N3 N4 C38C37  | 0.2(6)    | C45 S2 C36C37 | 6.4(6)     |
| N3 N4 C38C39  | -177.7(5) | C46C42C44C43  | 179.4(5)   |

**Table S12. Hydrogen Atom Coordinates ( $\text{\AA}\times 10^4$ ) and Isotropic Displacement Parameters ( $\text{\AA}^2\times 10^3$ ) for 3ja.**

| Atom | <i>x</i> | <i>y</i> | <i>z</i> | U(eq) |
|------|----------|----------|----------|-------|
| H2   | 5592.25  | 692.19   | 6183.23  | 32    |
| H3   | 5276.47  | 624.37   | 5139.56  | 31    |
| H5   | 2437.8   | 3776.2   | 5285.86  | 32    |
| H6   | 2755.53  | 3882.19  | 6329.75  | 34    |
| H8   | 1961.58  | 3156.85  | 4398.52  | 38    |
| H9   | 1699.58  | 3232.59  | 3349.66  | 49    |
| H10  | 3206.59  | 2395.23  | 2726.05  | 48    |
| H11  | 4965.14  | 1348.86  | 3161.09  | 43    |
| H12  | 5231.09  | 1228.92  | 4213.51  | 37    |
| H14  | 4062.58  | 2383.77  | 8395.25  | 36    |
| H17  | 5862.45  | 1530.27  | 8959.15  | 40    |
| H18  | 7483.51  | 1980.07  | 9613.25  | 43    |
| H20  | 9213.88  | 4250.5   | 8242.73  | 38    |
| H21  | 7580.54  | 3811.23  | 7589.46  | 36    |
| H22A | 857.41   | 2259.43  | 8113.49  | 58    |
| H22B | 1939.74  | 3560.46  | 8262.75  | 58    |
| H22C | 2085.8   | 1451.47  | 8351.79  | 58    |
| H25  | -414     | 6097.44  | 4844.65  | 38    |
| H26  | -692.92  | 6027.24  | 3796.86  | 44    |
| H27  | 781.11   | 6982.54  | 3172.8   | 41    |
| H28  | 2512.28  | 8186.21  | 3611.34  | 42    |
| H29  | 2791.56  | 8241.45  | 4661.01  | 39    |
| H31  | 2874.06  | 8779.26  | 5571.92  | 31    |
| H32  | 3205.31  | 8779.76  | 6619.17  | 32    |
| H34  | 331.84   | 5679.05  | 6799.4   | 31    |

|      |         |         |          |    |
|------|---------|---------|----------|----|
| H35  | 33.3    | 5633.02 | 5754.06  | 31 |
| H37  | 1528.24 | 7775.71 | 8827.27  | 36 |
| H40  | 3196.52 | 8424.84 | 9419.07  | 43 |
| H41  | 4810.8  | 8596.98 | 10087.49 | 44 |
| H43  | 5212.29 | 6429.09 | 8115.57  | 41 |
| H44  | 6837.24 | 6578.58 | 8784.55  | 43 |
| H45A | -1575.8 | 9129.48 | 8381.36  | 62 |
| H45B | -264.77 | 9686.43 | 8577.17  | 62 |
| H45C | -725.82 | 7719.99 | 8719.7   | 62 |

**Table S13. Atomic Occupancy for 3ja.**

| Atom | Occupancy | Atom | Occupancy | Atom | Occupancy |
|------|-----------|------|-----------|------|-----------|
| F5   | 0.57(3)   | F6   | 0.43(3)   | F7   | 0.57(3)   |
| F8   | 0.43(3)   | F9   | 0.57(3)   | F10  | 0.43(3)   |

## 9. Crystal data and structure refinement of 5a

Single crystal of compound alkynyl imines was obtained by slow evaporation from CH<sub>2</sub>Cl<sub>2</sub> solution.

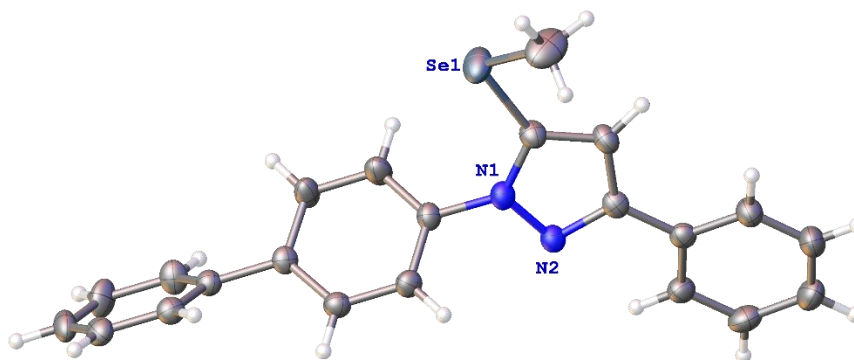

**Figure S14.** Crystal data and structure refinement of product **5a** (with thermal ellipsoids shown at the 50% probability level)

**Table S15. Crystal data and structure refinement for 5a.**

|                     |                                                   |
|---------------------|---------------------------------------------------|
| Identification code | <b>5a</b>                                         |
| Empirical formula   | C <sub>22</sub> H <sub>18</sub> N <sub>2</sub> Se |
| Formula weight      | 389.34                                            |
| Temperature/K       | 219.99(10)                                        |
| Crystal system      | monoclinic                                        |
| Space group         | P2 <sub>1</sub> /n                                |
| a/Å                 | 9.6690(4)                                         |
| b/Å                 | 13.8133(4)                                        |

|                                               |                                                               |
|-----------------------------------------------|---------------------------------------------------------------|
| $c/\text{\AA}$                                | 13.9111(4)                                                    |
| $\alpha/^\circ$                               | 90                                                            |
| $\beta/^\circ$                                | 101.261(3)                                                    |
| $\gamma/^\circ$                               | 90                                                            |
| Volume/ $\text{\AA}^3$                        | 1822.21(11)                                                   |
| $Z$                                           | 4                                                             |
| $\rho_{\text{calc}}/\text{g/cm}^3$            | 1.419                                                         |
| $\mu/\text{mm}^{-1}$                          | 2.818                                                         |
| $F(000)$                                      | 792.0                                                         |
| Crystal size/ $\text{mm}^3$                   | $0.15 \times 0.14 \times 0.12$                                |
| Radiation                                     | Cu $K\alpha$ ( $\lambda = 1.54184$ )                          |
| $2\Theta$ range for data collection/ $^\circ$ | 9.11 to 147.5                                                 |
| Index ranges                                  | $-12 \leq h \leq 5, -16 \leq k \leq 16, -17 \leq l \leq 17$   |
| Reflections collected                         | 7179                                                          |
| Independent reflections                       | 3572 [ $R_{\text{int}} = 0.0434, R_{\text{sigma}} = 0.0536$ ] |
| Data/restraints/parameters                    | 3572/0/227                                                    |
| Goodness-of-fit on $F^2$                      | 1.048                                                         |
| Final $R$ indexes [ $I \geq 2\sigma(I)$ ]     | $R_1 = 0.0517, wR_2 = 0.1336$                                 |
| Final $R$ indexes [all data]                  | $R_1 = 0.0648, wR_2 = 0.1514$                                 |
| Largest diff. peak/hole / $e \text{\AA}^{-3}$ | 0.44/-0.65                                                    |

#### Crystal structure determination of 5a

**Crystal Data** for  $\text{C}_{22}\text{H}_{18}\text{N}_2\text{Se}$  ( $M = 389.34$  g/mol): monoclinic, space group  $P2_1/n$  (no. 14),  $a = 9.6690(4)$   $\text{\AA}$ ,  $b = 13.8133(4)$   $\text{\AA}$ ,  $c = 13.9111(4)$   $\text{\AA}$ ,  $\beta = 101.261(3)^\circ$ ,  $V = 1822.21(11)$   $\text{\AA}^3$ ,  $Z = 4$ ,  $T = 219.99(10)$  K,  $\mu(\text{Cu } K\alpha) = 2.818$   $\text{mm}^{-1}$ ,  $D_{\text{calc}} = 1.419$   $\text{g/cm}^3$ , 7179 reflections measured ( $9.11^\circ \leq 2\Theta \leq 147.5^\circ$ ), 3572 unique ( $R_{\text{int}} = 0.0434, R_{\text{sigma}} = 0.0536$ ) which were used in all calculations. The final  $R_1$  was 0.0517 ( $I > 2\sigma(I)$ ) and  $wR_2$  was 0.1514 (all data).

**Table S16. Fractional Atomic Coordinates ( $\times 10^4$ ) and Equivalent Isotropic Displacement Parameters ( $\text{\AA}^2 \times 10^3$ ) for 5a.  $U_{\text{eq}}$  is defined as 1/3 of the trace of the orthogonalised  $U_{\text{II}}$  tensor.**

| Atom | $x$       | $y$        | $z$        | $U(\text{eq})$ |
|------|-----------|------------|------------|----------------|
| Se1  | 3014.6(5) | 4136.4(3)  | 5174.5(3)  | 57.20(19)      |
| N1   | 4472(3)   | 3143.9(18) | 6885.8(18) | 33.0(5)        |
| N2   | 4847(2)   | 2272.3(19) | 7295.1(16) | 32.2(5)        |
| C1   | 6282(3)   | 6513(2)    | 9138(2)    | 31.6(6)        |
| C2   | 5638(3)   | 6746(2)    | 9919(2)    | 41.6(7)        |
| C3   | 6051(4)   | 7554(3)    | 10491(2)   | 47.8(8)        |
| C4   | 7125(4)   | 8142(2)    | 10300(2)   | 44.2(8)        |
| C5   | 7769(3)   | 7917(2)    | 9520(2)    | 39.6(7)        |
| C6   | 7357(3)   | 7111(2)    | 8951(2)    | 34.9(6)        |
| C7   | 5826(3)   | 5647(2)    | 8534(2)    | 31.0(6)        |



|     |         |          |         |          |
|-----|---------|----------|---------|----------|
| C8  | 6787(3) | 4957(2)  | 8343(2) | 34.0(6)  |
| C9  | 6350(3) | 4138(2)  | 7789(2) | 33.9(6)  |
| C10 | 4925(3) | 4000(2)  | 7425(2) | 32.2(6)  |
| C11 | 3950(3) | 4672(3)  | 7607(2) | 40.9(7)  |
| C12 | 4401(3) | 5489(2)  | 8154(3) | 41.0(7)  |
| C13 | 3635(3) | 3051(2)  | 5975(2) | 35.6(6)  |
| C14 | 3473(3) | 2074(2)  | 5802(2) | 36.9(6)  |
| C15 | 4239(3) | 1622(2)  | 6638(2) | 32.0(6)  |
| C16 | 4405(3) | 581(2)   | 6848(2) | 32.5(6)  |
| C17 | 4855(3) | 255(2)   | 7811(2) | 38.4(7)  |
| C18 | 4997(4) | -729(3)  | 8013(3) | 48.7(8)  |
| C19 | 4709(4) | -1396(3) | 7257(3) | 50.9(8)  |
| C20 | 4279(4) | -1071(3) | 6310(3) | 50.5(9)  |
| C21 | 4122(3) | -100(3)  | 6108(2) | 40.9(7)  |
| C22 | 3320(6) | 3589(4)  | 3947(3) | 75.6(14) |

**Table S17. Anisotropic Displacement Parameters ( $\text{\AA}^2 \times 10^3$ ) for 5a. The Anisotropic displacement factor exponent takes the form:  $-2\pi^2[h^2a^{*2}U_{11}+2hka^*b^*U_{12}+\dots]$ .**

| Atom | U <sub>11</sub> | U <sub>22</sub> | U <sub>33</sub> | U <sub>23</sub> | U <sub>13</sub> | U <sub>12</sub> |
|------|-----------------|-----------------|-----------------|-----------------|-----------------|-----------------|
| Se1  | 87.9(4)         | 37.2(3)         | 42.1(3)         | 4.44(15)        | 1.7(2)          | 6.79(19)        |
| N1   | 37.9(12)        | 31.4(13)        | 30.9(11)        | -2.6(10)        | 9.4(10)         | -1.1(10)        |
| N2   | 36.5(12)        | 32.2(13)        | 28.4(11)        | -2.2(10)        | 7.9(9)          | -0.8(10)        |
| C1   | 33.0(13)        | 31.4(15)        | 30.3(13)        | -0.1(12)        | 5.9(11)         | -0.3(11)        |
| C2   | 46.7(16)        | 40.6(18)        | 42.4(16)        | -3.2(14)        | 20.8(14)        | -6.6(14)        |
| C3   | 73(2)           | 37.8(18)        | 39.3(16)        | -8.1(14)        | 26.4(16)        | 5.0(17)         |
| C4   | 64(2)           | 26.6(15)        | 38.0(16)        | -2.1(13)        | -0.2(14)        | -1.9(14)        |
| C5   | 45.0(16)        | 32.4(16)        | 39.9(15)        | 5.3(13)         | 5.0(13)         | -1.1(13)        |
| C6   | 37.2(14)        | 38.7(16)        | 29.8(13)        | 1.2(12)         | 8.7(11)         | 1.5(13)         |
| C7   | 34.9(13)        | 33.8(15)        | 26.8(12)        | -1.7(11)        | 12.2(10)        | -0.8(12)        |
| C8   | 31.5(13)        | 37.2(16)        | 33.5(14)        | -0.3(12)        | 6.5(11)         | 1.1(12)         |
| C9   | 33.5(14)        | 36.0(16)        | 33.7(14)        | -3.4(12)        | 10.2(11)        | 2.7(12)         |
| C10  | 37.2(14)        | 30.2(15)        | 30.0(13)        | -2.9(11)        | 8.8(11)         | -1.5(12)        |
| C11  | 28.4(13)        | 44.4(18)        | 50.4(17)        | -12.1(15)       | 8.6(12)         | -2.2(13)        |
| C12  | 31.1(14)        | 40.3(17)        | 53.3(18)        | -16.3(15)       | 12.9(13)        | -0.9(13)        |
| C13  | 41.7(15)        | 36.0(16)        | 28.8(13)        | 1.5(12)         | 6.1(11)         | -2.6(13)        |
| C14  | 41.8(15)        | 37.5(16)        | 30.5(13)        | -3.8(12)        | 4.8(11)         | -8.8(13)        |
| C15  | 30.8(12)        | 36.9(15)        | 30.5(13)        | -1.4(12)        | 11.5(10)        | -3.6(12)        |
| C16  | 27.5(12)        | 35.8(16)        | 34.6(14)        | -1.2(12)        | 7.1(10)         | 0.2(11)         |
| C17  | 38.5(14)        | 39.5(17)        | 35.9(14)        | -3.0(13)        | 3.8(12)         | 5.5(13)         |
| C18  | 44.4(17)        | 50(2)           | 49.2(19)        | 9.2(16)         | 2.3(14)         | 12.0(15)        |

|     |          |          |          |           |          |          |
|-----|----------|----------|----------|-----------|----------|----------|
| C19 | 49.9(18) | 33.4(17) | 67(2)    | 0.6(16)   | 4.5(16)  | 3.4(15)  |
| C20 | 51.1(18) | 39.3(19) | 56(2)    | -11.4(16) | -0.8(16) | -1.5(15) |
| C21 | 45.2(16) | 36.8(17) | 38.8(15) | -3.0(13)  | 3.3(13)  | -2.8(14) |
| C22 | 108(4)   | 83(3)    | 35.8(18) | 12(2)     | 15(2)    | 28(3)    |

**Table S18. Bond Lengths for 5a.**

| Atom | Atom | Length/Å | Atom | Atom | Length/Å |
|------|------|----------|------|------|----------|
| Se1  | C13  | 1.894(3) | C7   | C12  | 1.393(4) |
| Se1  | C22  | 1.942(4) | C8   | C9   | 1.388(4) |
| N1   | N2   | 1.351(3) | C9   | C10  | 1.385(4) |
| N1   | C10  | 1.423(4) | C10  | C11  | 1.380(4) |
| N1   | C13  | 1.369(4) | C11  | C12  | 1.384(4) |
| N2   | C15  | 1.333(4) | C13  | C14  | 1.375(4) |
| C1   | C2   | 1.392(4) | C14  | C15  | 1.399(4) |
| C1   | C6   | 1.392(4) | C15  | C16  | 1.469(4) |
| C1   | C7   | 1.478(4) | C16  | C17  | 1.400(4) |
| C2   | C3   | 1.384(5) | C16  | C21  | 1.381(4) |
| C3   | C4   | 1.384(5) | C17  | C18  | 1.389(5) |
| C4   | C5   | 1.388(5) | C18  | C19  | 1.385(5) |
| C5   | C6   | 1.380(4) | C19  | C20  | 1.377(5) |
| C7   | C8   | 1.393(4) | C20  | C21  | 1.374(5) |

**Table S19. Bond Angles for 5a.**

| Atom | Atom | Atom | Angle/°   | Atom | Atom | Atom | Angle/°  |
|------|------|------|-----------|------|------|------|----------|
| C13  | Se1  | C22  | 97.12(17) | C11  | C10  | N1   | 120.3(3) |
| N2   | N1   | C10  | 119.3(2)  | C11  | C10  | C9   | 120.4(3) |
| N2   | N1   | C13  | 111.6(2)  | C10  | C11  | C12  | 119.7(3) |
| C13  | N1   | C10  | 129.1(3)  | C11  | C12  | C7   | 121.3(3) |
| C15  | N2   | N1   | 105.4(2)  | N1   | C13  | Se1  | 122.1(2) |
| C2   | C1   | C7   | 120.1(3)  | N1   | C13  | C14  | 106.3(3) |
| C6   | C1   | C2   | 118.3(3)  | C14  | C13  | Se1  | 131.4(2) |
| C6   | C1   | C7   | 121.7(3)  | C13  | C14  | C15  | 105.6(3) |
| C3   | C2   | C1   | 120.8(3)  | N2   | C15  | C14  | 111.1(3) |
| C2   | C3   | C4   | 120.4(3)  | N2   | C15  | C16  | 120.5(3) |
| C3   | C4   | C5   | 119.1(3)  | C14  | C15  | C16  | 128.4(3) |
| C6   | C5   | C4   | 120.4(3)  | C17  | C16  | C15  | 120.4(3) |
| C5   | C6   | C1   | 120.9(3)  | C21  | C16  | C15  | 121.3(3) |
| C8   | C7   | C1   | 121.7(3)  | C21  | C16  | C17  | 118.3(3) |
| C12  | C7   | C1   | 120.4(3)  | C18  | C17  | C16  | 120.5(3) |
| C12  | C7   | C8   | 117.8(3)  | C19  | C18  | C17  | 120.0(3) |

|     |     |    |          |     |     |     |          |
|-----|-----|----|----------|-----|-----|-----|----------|
| C9  | C8  | C7 | 121.5(3) | C20 | C19 | C18 | 119.2(4) |
| C10 | C9  | C8 | 119.2(3) | C21 | C20 | C19 | 120.9(3) |
| C9  | C10 | N1 | 119.2(3) | C20 | C21 | C16 | 121.0(3) |

**Table S20. Torsion Angles for 5a.**

| A   | B   | C   | D   | Angle/°     | A   | B   | C   | D   | Angle/°   |
|-----|-----|-----|-----|-------------|-----|-----|-----|-----|-----------|
| Se1 | C13 | C14 | C15 | 176.0(2)    | C8  | C7  | C12 | C11 | 0.2(5)    |
| N1  | N2  | C15 | C14 | 0.2(3)      | C8  | C9  | C10 | N1  | -177.8(3) |
| N1  | N2  | C15 | C16 | -179.0(2)   | C8  | C9  | C10 | C11 | 0.3(4)    |
| N1  | C10 | C11 | C12 | 178.2(3)    | C9  | C10 | C11 | C12 | 0.2(5)    |
| N1  | C13 | C14 | C15 | 0.1(3)      | C10 | N1  | N2  | C15 | 178.1(2)  |
| N2  | N1  | C10 | C9  | 55.0(4)     | C10 | N1  | C13 | Se1 | 5.6(4)    |
| N2  | N1  | C10 | C11 | -123.1(3)   | C10 | N1  | C13 | C14 | -178.0(3) |
| N2  | N1  | C13 | Se1 | -176.40(19) | C10 | C11 | C12 | C7  | -0.4(5)   |
| N2  | N1  | C13 | C14 | 0.0(3)      | C12 | C7  | C8  | C9  | 0.2(4)    |
| N2  | C15 | C16 | C17 | 17.6(4)     | C13 | N1  | N2  | C15 | -0.1(3)   |
| N2  | C15 | C16 | C21 | -162.5(3)   | C13 | N1  | C10 | C9  | -127.2(3) |
| C1  | C2  | C3  | C4  | -0.5(5)     | C13 | N1  | C10 | C11 | 54.7(4)   |
| C1  | C7  | C8  | C9  | 179.0(3)    | C13 | C14 | C15 | N2  | -0.2(3)   |
| C1  | C7  | C12 | C11 | -178.5(3)   | C13 | C14 | C15 | C16 | 179.0(3)  |
| C2  | C1  | C6  | C5  | -0.4(4)     | C14 | C15 | C16 | C17 | -161.5(3) |
| C2  | C1  | C7  | C8  | -128.8(3)   | C14 | C15 | C16 | C21 | 18.4(4)   |
| C2  | C1  | C7  | C12 | 49.9(4)     | C15 | C16 | C17 | C18 | 179.2(3)  |
| C2  | C3  | C4  | C5  | 0.8(5)      | C15 | C16 | C21 | C20 | -180.0(3) |
| C3  | C4  | C5  | C6  | -0.8(5)     | C16 | C17 | C18 | C19 | 0.8(5)    |
| C4  | C5  | C6  | C1  | 0.6(5)      | C17 | C16 | C21 | C20 | -0.1(5)   |
| C6  | C1  | C2  | C3  | 0.3(5)      | C17 | C18 | C19 | C20 | -0.2(5)   |
| C6  | C1  | C7  | C8  | 50.9(4)     | C18 | C19 | C20 | C21 | -0.5(6)   |
| C6  | C1  | C7  | C12 | -130.4(3)   | C19 | C20 | C21 | C16 | 0.7(5)    |
| C7  | C1  | C2  | C3  | -180.0(3)   | C21 | C16 | C17 | C18 | -0.7(4)   |
| C7  | C1  | C6  | C5  | 179.9(3)    | C22 | Se1 | C13 | N1  | 137.5(3)  |
| C7  | C8  | C9  | C10 | -0.5(4)     | C22 | Se1 | C13 | C14 | -37.9(4)  |

**Table S21. Hydrogen Atom Coordinates ( $\text{\AA} \times 10^4$ ) and Isotropic Displacement Parameters ( $\text{\AA}^2 \times 10^3$ ) for 5a.**

| Atom | x       | y       | z        | U(eq) |
|------|---------|---------|----------|-------|
| H2   | 4904.89 | 6345.01 | 10061.48 | 50    |
| H3   | 5595.75 | 7705.91 | 11018.27 | 57    |
| H4   | 7416.29 | 8692.17 | 10697.62 | 53    |
| H5   | 8498.56 | 8321.09 | 9377.7   | 47    |

| Atom | x       | y        | z       | U(eq) |
|------|---------|----------|---------|-------|
| H6   | 7813.6  | 6962.24  | 8422.86 | 42    |
| H8   | 7763.81 | 5049.69  | 8596.84 | 41    |
| H9   | 7020.25 | 3677.45  | 7660.23 | 41    |
| H11  | 2973.49 | 4573.05  | 7356.99 | 49    |
| H12  | 3726.52 | 5950.4   | 8273.58 | 49    |
| H14  | 2951.3  | 1769.28  | 5232.47 | 44    |
| H17  | 5065.29 | 710.37   | 8331.08 | 46    |
| H18  | 5291.02 | -944.03  | 8669.71 | 58    |
| H19  | 4807.62 | -2069.39 | 7390.45 | 61    |
| H20  | 4088.82 | -1525.95 | 5788.5  | 61    |
| H21  | 3813.95 | 107.44   | 5450.11 | 49    |
| H22A | 3294.72 | 4106.87  | 3462.39 | 113   |
| H22B | 2578.08 | 3115.88  | 3706.4  | 113   |
| H22C | 4241.5  | 3268.51  | 4053.37 | 113   |

## 10. Crystal data and structure refinement of product alkynyl imine

Single crystal of compound **alkynyl imine** was obtained by slow evaporation from CH<sub>2</sub>Cl<sub>2</sub> solution.

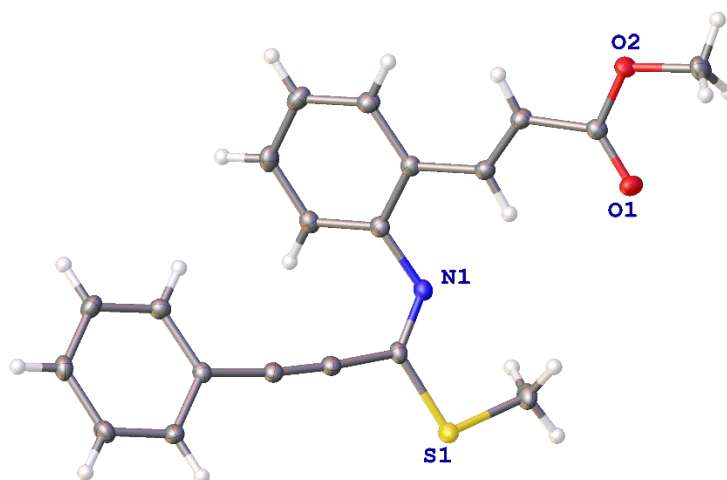

**Figure S22.** Crystal data and structure refinement of product alkynyl imines (with thermal ellipsoids shown at the 50% probability level)

**Table S23.** Crystal data and structure refinement for alkynyl imine.

| Identification code | alkynyl imine                                     |
|---------------------|---------------------------------------------------|
| Empirical formula   | C <sub>20</sub> H <sub>17</sub> NO <sub>2</sub> S |
| Formula weight      | 335.40                                            |
| Temperature/K       | 296.30                                            |

|                                               |                                                               |
|-----------------------------------------------|---------------------------------------------------------------|
| Crystal system                                | triclinic                                                     |
| Space group                                   | P-1                                                           |
| $a/\text{\AA}$                                | 8.053(4)                                                      |
| $b/\text{\AA}$                                | 10.667(4)                                                     |
| $c/\text{\AA}$                                | 11.338(6)                                                     |
| $\alpha/^\circ$                               | 111.696(14)                                                   |
| $\beta/^\circ$                                | 95.674(19)                                                    |
| $\gamma/^\circ$                               | 101.888(16)                                                   |
| Volume/ $\text{\AA}^3$                        | 869.0(7)                                                      |
| Z                                             | 2                                                             |
| $\rho_{\text{calc}}/\text{g/cm}^3$            | 1.282                                                         |
| $\mu/\text{mm}^{-1}$                          | 0.197                                                         |
| F(000)                                        | 352.0                                                         |
| Crystal size/ $\text{mm}^3$                   | $0.14 \times 0.12 \times 0.11$                                |
| Radiation                                     | MoK $\alpha$ ( $\lambda = 0.71073$ )                          |
| $2\Theta$ range for data collection/ $^\circ$ | 3.94 to 57.414                                                |
| Index ranges                                  | $-10 \leq h \leq 10, -14 \leq k \leq 13, -15 \leq l \leq 15$  |
| Reflections collected                         | 22643                                                         |
| Independent reflections                       | 4397 [ $R_{\text{int}} = 0.0957, R_{\text{sigma}} = 0.0717$ ] |
| Data/restraints/parameters                    | 4397/0/219                                                    |
| Goodness-of-fit on $F^2$                      | 1.010                                                         |
| Final R indexes [ $I \geq 2\sigma(I)$ ]       | $R_1 = 0.0505, wR_2 = 0.1066$                                 |
| Final R indexes [all data]                    | $R_1 = 0.0841, wR_2 = 0.1236$                                 |
| Largest diff. peak/hole / $e \text{\AA}^{-3}$ | 0.26/-0.31                                                    |

### Crystal structure determination of alkynyl imine

**Crystal Data** for  $\text{C}_{20}\text{H}_{17}\text{NO}_2\text{S}$  ( $M = 335.40 \text{ g/mol}$ ): triclinic, space group P-1 (no. 2),  $a = 8.053(4) \text{ \AA}$ ,  $b = 10.667(4) \text{ \AA}$ ,  $c = 11.338(6) \text{ \AA}$ ,  $\alpha = 111.696(14)^\circ$ ,  $\beta = 95.674(19)^\circ$ ,  $\gamma = 101.888(16)^\circ$ ,  $V = 869.0(7) \text{ \AA}^3$ ,  $Z = 2$ ,  $T = 296.30 \text{ K}$ ,  $\mu(\text{MoK}\alpha) = 0.197 \text{ mm}^{-1}$ ,  $D_{\text{calc}} = 1.282 \text{ g/cm}^3$ , 22643 reflections measured ( $3.94^\circ \leq 2\Theta \leq 57.414^\circ$ ), 4397 unique ( $R_{\text{int}} = 0.0957, R_{\text{sigma}} = 0.0717$ ) which were used in all calculations. The final  $R_1$  was 0.0505 ( $I > 2\sigma(I)$ ) and  $wR_2$  was 0.1236 (all data).

**Table S24. Fractional Atomic Coordinates ( $\times 10^4$ ) and Equivalent Isotropic Displacement Parameters ( $\text{\AA}^2 \times 10^3$ ) for alkynyl imine.  $U_{\text{eq}}$  is defined as 1/3 of the trace of the orthogonalised  $U_{\text{ij}}$  tensor.**

| Atom | $x$        | $y$        | $z$         | $U(\text{eq})$ |
|------|------------|------------|-------------|----------------|
| S1   | 672.6(7)   | 2032.5(5)  | 8298.3(5)   | 30.97(15)      |
| O1   | 3107(2)    | 2176.0(14) | 3402.3(13)  | 37.8(4)        |
| O2   | 3766.7(18) | 3607.0(13) | 2378.0(12)  | 32.0(3)        |
| N1   | 643(2)     | 3909.9(15) | 7268.3(14)  | 25.9(3)        |
| C1   | 4024(2)    | 6960.8(18) | 11540.4(16) | 24.0(4)        |
| C2   | 4017(2)    | 8266.5(19) | 11531.7(18) | 28.2(4)        |

|     |         |            |             |         |
|-----|---------|------------|-------------|---------|
| C3  | 4899(3) | 9483.6(19) | 12577.5(19) | 31.9(4) |
| C4  | 5800(3) | 9404(2)    | 13641.8(18) | 31.3(4) |
| C5  | 5810(3) | 8114(2)    | 13668.3(18) | 31.7(4) |
| C6  | 4931(2) | 6884.9(19) | 12616.9(17) | 28.2(4) |
| C7  | 3072(2) | 5721.4(18) | 10434.3(17) | 26.6(4) |
| C8  | 2222(2) | 4774.9(19) | 9467.7(17)  | 27.1(4) |
| C9  | 1170(2) | 3710.2(18) | 8276.3(17)  | 24.9(4) |
| C10 | 970(2)  | 5287.0(18) | 7308.5(17)  | 24.7(4) |
| C11 | 469(2)  | 6341.0(19) | 8243.0(17)  | 28.3(4) |
| C12 | 704(2)  | 7657(2)    | 8233.2(18)  | 32.1(5) |
| C13 | 1434(3) | 7947(2)    | 7270(2)     | 32.8(5) |
| C14 | 1918(2) | 6905(2)    | 6326.1(19)  | 29.9(4) |
| C15 | 1695(2) | 5558.5(18) | 6315.6(17)  | 24.2(4) |
| C16 | 2179(2) | 4446.5(19) | 5313.0(17)  | 24.9(4) |
| C17 | 2901(2) | 4537.1(19) | 4334.3(17)  | 26.9(4) |
| C18 | 3259(2) | 3314.5(19) | 3361.1(17)  | 25.8(4) |
| C19 | 4085(3) | 2483(2)    | 1319.9(19)  | 36.0(5) |
| C20 | -606(3) | 1008(2)    | 6704.7(19)  | 38.6(5) |

**Table S25. Anisotropic Displacement Parameters ( $\text{\AA}^2 \times 10^3$ ) for alkynyl imine. The Anisotropic displacement factor exponent takes the form:  $-2\pi^2[\text{h}^2\text{a}^*2\text{U}_{11}+2\text{hka}^*\text{b}^*\text{U}_{12}+\dots]$ .**

| Atom | U <sub>11</sub> | U <sub>22</sub> | U <sub>33</sub> | U <sub>23</sub> | U <sub>13</sub> | U <sub>12</sub> |
|------|-----------------|-----------------|-----------------|-----------------|-----------------|-----------------|
| S1   | 38.3(3)         | 25.4(2)         | 26.2(3)         | 10.34(19)       | 5.7(2)          | 2.3(2)          |
| O1   | 56.4(10)        | 32.4(8)         | 36.7(8)         | 19.4(6)         | 20.3(7)         | 21.2(7)         |
| O2   | 42.6(8)         | 30.8(7)         | 29.6(7)         | 15.1(6)         | 18.5(6)         | 12.8(6)         |
| N1   | 27.2(8)         | 25.4(8)         | 22.5(8)         | 7.9(6)          | 6.3(6)          | 3.8(6)          |
| C1   | 21.9(9)         | 24.5(9)         | 22.8(9)         | 7.8(7)          | 5.6(7)          | 3.0(7)          |
| C2   | 28.9(10)        | 30.2(10)        | 27.8(10)        | 13.2(8)         | 5.1(8)          | 9.4(8)          |
| C3   | 34.8(11)        | 22.9(9)         | 37.7(11)        | 10.4(8)         | 9.3(9)          | 8.8(8)          |
| C4   | 31.7(11)        | 27.2(10)        | 26.4(10)        | 3.2(8)          | 6.8(8)          | 3.6(8)          |
| C5   | 34.2(11)        | 34.1(10)        | 22.7(9)         | 9.6(8)          | 2.2(8)          | 5.1(9)          |
| C6   | 33.4(11)        | 24.6(9)         | 26.9(10)        | 11.7(8)         | 6.1(8)          | 5.6(8)          |
| C7   | 29.8(10)        | 25.0(9)         | 25.2(9)         | 10.5(8)         | 8.2(8)          | 5.3(8)          |
| C8   | 31.3(10)        | 25.3(9)         | 24.6(9)         | 11.0(8)         | 6.6(8)          | 4.9(8)          |
| C9   | 24.9(9)         | 24.6(9)         | 20.7(9)         | 5.2(7)          | 6.7(7)          | 2.8(7)          |
| C10  | 21.2(9)         | 25.2(9)         | 24.0(9)         | 8.3(7)          | 1.9(7)          | 2.8(7)          |
| C11  | 27.8(10)        | 32.0(10)        | 23.6(9)         | 8.7(8)          | 5.8(8)          | 8.9(8)          |
| C12  | 29.9(11)        | 31.1(10)        | 31.0(10)        | 5.2(8)          | 6.7(8)          | 12.2(8)         |
| C13  | 30.4(11)        | 24.5(9)         | 43.2(12)        | 12.7(9)         | 6.7(9)          | 8.0(8)          |
| C14  | 29.2(10)        | 29.7(10)        | 33.2(10)        | 15.1(8)         | 9.6(8)          | 6.6(8)          |

|     |          |          |          |         |         |          |
|-----|----------|----------|----------|---------|---------|----------|
| C15 | 20.9(9)  | 25.8(9)  | 24.5(9)  | 9.4(7)  | 3.2(7)  | 5.0(7)   |
| C16 | 24.5(9)  | 25.1(9)  | 26.0(9)  | 11.4(7) | 3.3(7)  | 6.5(7)   |
| C17 | 26.3(10) | 24.2(9)  | 31.0(10) | 11.9(8) | 8.2(8)  | 5.3(7)   |
| C18 | 23.2(10) | 29.6(10) | 26.0(9)  | 11.9(8) | 6.1(7)  | 7.4(8)   |
| C19 | 42.7(12) | 40.1(11) | 27.7(10) | 11.2(9) | 14.7(9) | 16.9(10) |
| C20 | 45.1(13) | 28.0(10) | 29.9(11) | 4.4(8)  | 5.5(9)  | -2.6(9)  |

**Table S26. Bond Lengths for alkynyl imine.**

| Atom | Atom | Length/Å | Atom | Atom | Length/Å |
|------|------|----------|------|------|----------|
| S1   | C9   | 1.762(2) | C5   | C6   | 1.392(3) |
| S1   | C20  | 1.797(2) | C7   | C8   | 1.199(3) |
| O1   | C18  | 1.214(2) | C8   | C9   | 1.440(3) |
| O2   | C18  | 1.342(2) | C10  | C11  | 1.393(2) |
| O2   | C19  | 1.437(2) | C10  | C15  | 1.412(3) |
| N1   | C9   | 1.286(2) | C11  | C12  | 1.381(3) |
| N1   | C10  | 1.421(2) | C12  | C13  | 1.391(3) |
| C1   | C2   | 1.398(3) | C13  | C14  | 1.383(3) |
| C1   | C6   | 1.397(3) | C14  | C15  | 1.406(3) |
| C1   | C7   | 1.441(2) | C15  | C16  | 1.460(2) |
| C2   | C3   | 1.382(3) | C16  | C17  | 1.328(3) |
| C3   | C4   | 1.385(3) | C17  | C18  | 1.468(3) |
| C4   | C5   | 1.389(3) |      |      |          |

**Table S27. Bond Angles for alkynyl imine.**

| Atom | Atom | Atom | Angle/°    | Atom | Atom | Atom | Angle/°    |
|------|------|------|------------|------|------|------|------------|
| C9   | S1   | C20  | 100.90(10) | C11  | C10  | N1   | 121.54(17) |
| C18  | O2   | C19  | 116.93(15) | C11  | C10  | C15  | 119.40(17) |
| C9   | N1   | C10  | 120.06(15) | C15  | C10  | N1   | 118.86(15) |
| C2   | C1   | C7   | 118.69(17) | C12  | C11  | C10  | 121.21(18) |
| C6   | C1   | C2   | 119.66(17) | C11  | C12  | C13  | 120.15(17) |
| C6   | C1   | C7   | 121.65(17) | C14  | C13  | C12  | 119.28(18) |
| C3   | C2   | C1   | 120.68(18) | C13  | C14  | C15  | 121.69(18) |
| C2   | C3   | C4   | 119.50(18) | C10  | C15  | C16  | 119.66(17) |
| C3   | C4   | C5   | 120.48(18) | C14  | C15  | C10  | 118.25(16) |
| C4   | C5   | C6   | 120.33(18) | C14  | C15  | C16  | 122.10(17) |
| C5   | C6   | C1   | 119.34(18) | C17  | C16  | C15  | 127.11(18) |
| C8   | C7   | C1   | 173.6(2)   | C16  | C17  | C18  | 121.41(17) |
| C7   | C8   | C9   | 176.0(2)   | O1   | C18  | O2   | 123.18(16) |
| N1   | C9   | S1   | 121.42(14) | O1   | C18  | C17  | 126.06(17) |
| N1   | C9   | C8   | 125.42(17) | O2   | C18  | C17  | 110.76(16) |
| C8   | C9   | S1   | 113.15(14) |      |      |      |            |

**Table S28. Torsion Angles for alkynyl imine.**

| A   | B   | C   | D   | Angle/°     | A   | B   | C   | D   | Angle/°     |
|-----|-----|-----|-----|-------------|-----|-----|-----|-----|-------------|
| N1  | C10 | C11 | C12 | -176.38(17) | C10 | C15 | C16 | C17 | -178.61(18) |
| N1  | C10 | C15 | C14 | 176.35(16)  | C11 | C10 | C15 | C14 | 1.3(3)      |
| N1  | C10 | C15 | C16 | -3.3(3)     | C11 | C10 | C15 | C16 | -178.33(16) |
| C1  | C2  | C3  | C4  | 0.1(3)      | C11 | C12 | C13 | C14 | 0.0(3)      |
| C2  | C1  | C6  | C5  | 0.2(3)      | C12 | C13 | C14 | C15 | -0.2(3)     |
| C2  | C3  | C4  | C5  | -0.6(3)     | C13 | C14 | C15 | C10 | -0.5(3)     |
| C3  | C4  | C5  | C6  | 0.8(3)      | C13 | C14 | C15 | C16 | 179.12(18)  |
| C4  | C5  | C6  | C1  | -0.7(3)     | C14 | C15 | C16 | C17 | 1.8(3)      |
| C6  | C1  | C2  | C3  | 0.0(3)      | C15 | C10 | C11 | C12 | -1.5(3)     |
| C7  | C1  | C2  | C3  | 179.34(17)  | C15 | C16 | C17 | C18 | -177.52(17) |
| C7  | C1  | C6  | C5  | -179.06(17) | C16 | C17 | C18 | O1  | -7.5(3)     |
| C9  | N1  | C10 | C11 | -54.7(2)    | C16 | C17 | C18 | O2  | 171.62(17)  |
| C9  | N1  | C10 | C15 | 130.34(19)  | C19 | O2  | C18 | O1  | 1.9(3)      |
| C10 | N1  | C9  | S1  | 175.90(13)  | C19 | O2  | C18 | C17 | -177.18(15) |
| C10 | N1  | C9  | C8  | -5.3(3)     | C20 | S1  | C9  | N1  | -0.94(18)   |
| C10 | C11 | C12 | C13 | 0.8(3)      | C20 | S1  | C9  | C8  | -179.85(14) |

**Table S29. Hydrogen Atom Coordinates ( $\text{\AA} \times 10^4$ ) and Isotropic Displacement Parameters ( $\text{\AA}^2 \times 10^3$ ) for alkynyl imine.**

| Atom | x        | y        | z        | U(eq) |
|------|----------|----------|----------|-------|
| H2   | 3412.74  | 8317.06  | 10815.07 | 34    |
| H3   | 4886.43  | 10349.01 | 12566.32 | 38    |
| H4   | 6403.15  | 10220.79 | 14344.05 | 38    |
| H5   | 6406.56  | 8072.2   | 14392.21 | 38    |
| H6   | 4947.48  | 6021.35  | 12630.97 | 34    |
| H11  | -33.28   | 6155.63  | 8885.43  | 34    |
| H12  | 374.37   | 8349.99  | 8871.85  | 39    |
| H13  | 1595.17  | 8832.03  | 7261.32  | 39    |
| H14  | 2402.58  | 7100.66  | 5681.78  | 36    |
| H16  | 1957.56  | 3579.99  | 5365.93  | 30    |
| H17  | 3186.45  | 5393.48  | 4263.66  | 32    |
| H19A | 4183.78  | 2746.23  | 601.09   | 54    |
| H19B | 3144.25  | 1662.39  | 1067.37  | 54    |
| H19C | 5140.97  | 2291.12  | 1584.57  | 54    |
| H20A | 103.16   | 1008.82  | 6072.34  | 58    |
| H20B | -1542.05 | 1403.01  | 6574.25  | 58    |
| H20C | -1063.52 | 66       | 6615.97  | 58    |



## 11. Copies of the NMR spectra

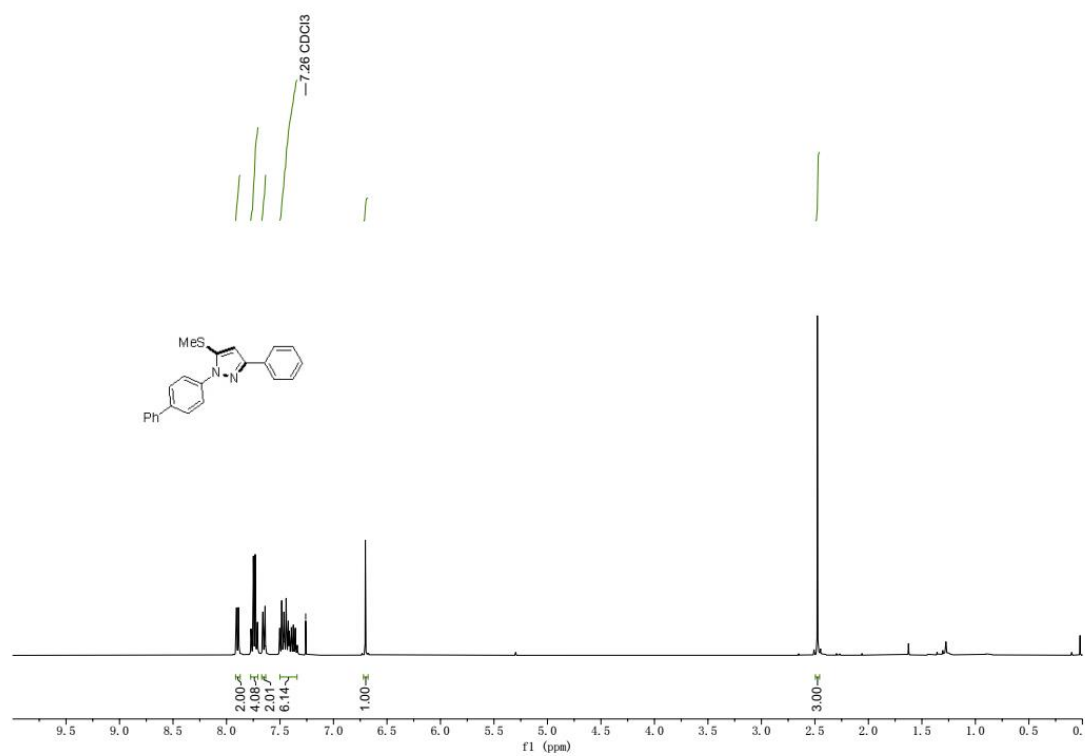

Figure S30. <sup>1</sup>H NMR (400 MHz, CDCl<sub>3</sub>) spectrum of 3aa

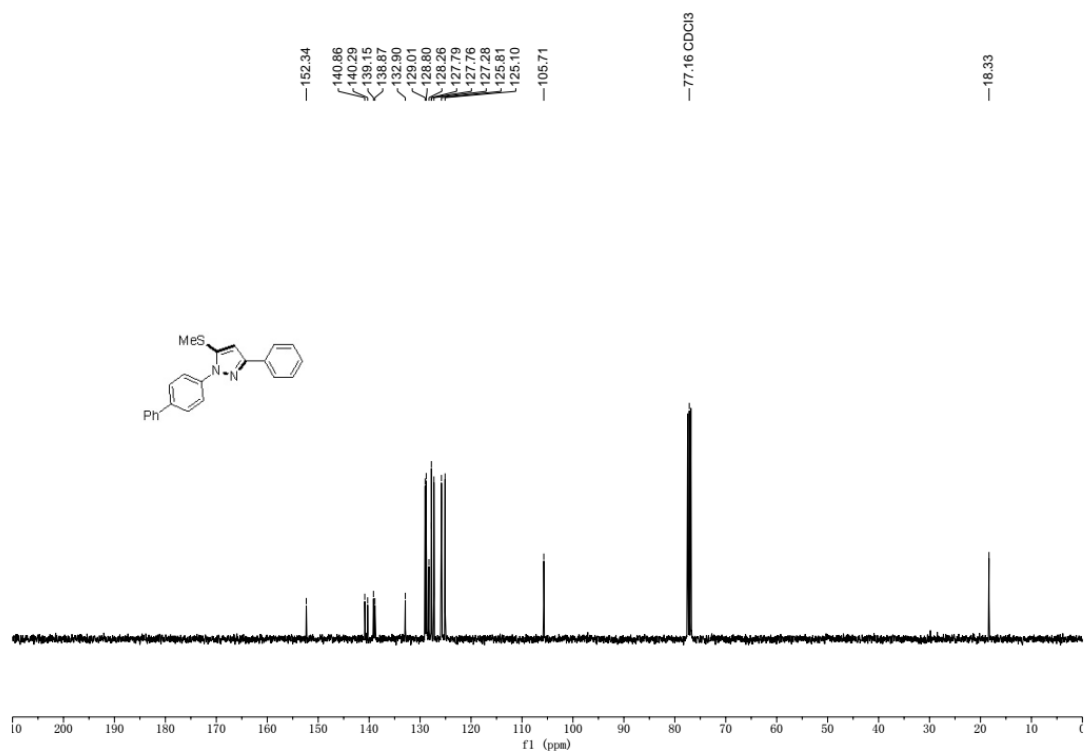

Figure S31. <sup>13</sup>C NMR (100 MHz, CDCl<sub>3</sub>) spectrum of 3aa

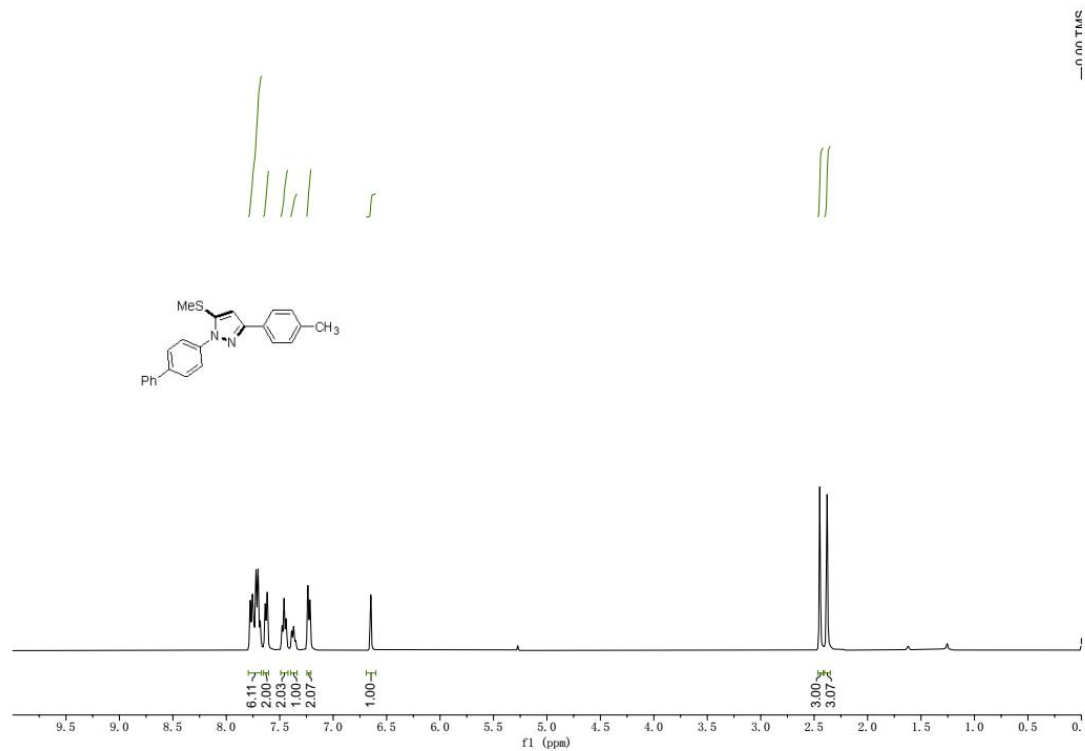

Figure S32.  $^1\text{H NMR}$  (400 MHz,  $\text{CDCl}_3$ ) spectrum of 3ba

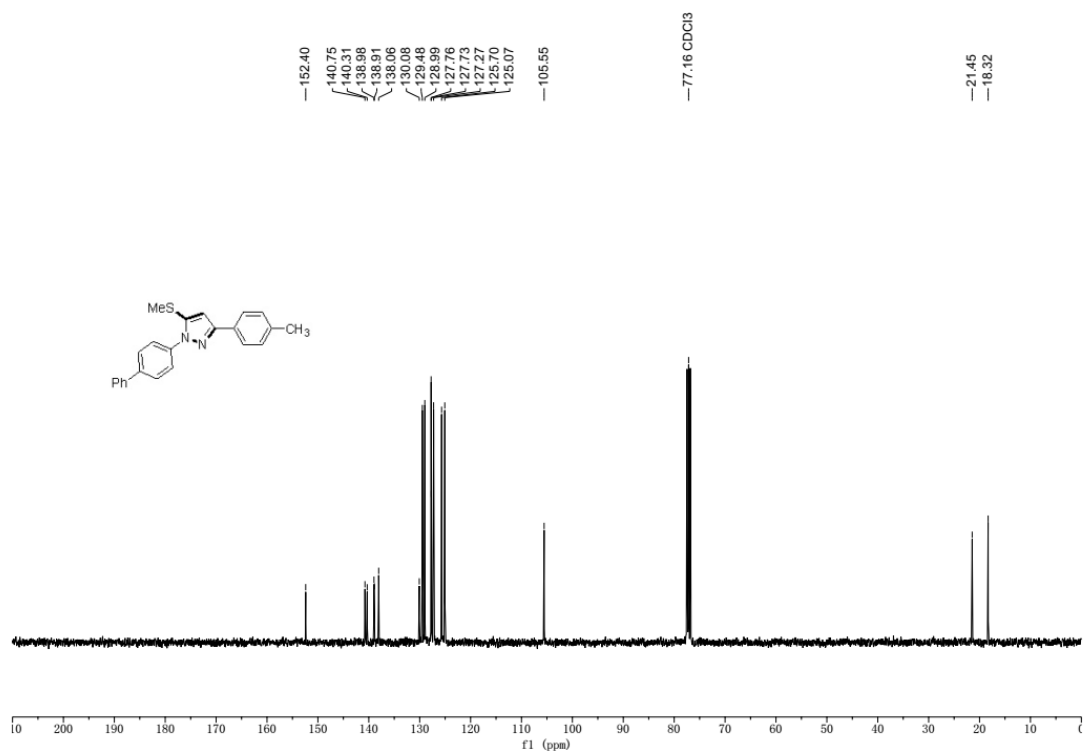

Figure S33.  $^{13}\text{C NMR}$  (100 MHz,  $\text{CDCl}_3$ ) spectrum of 3ba

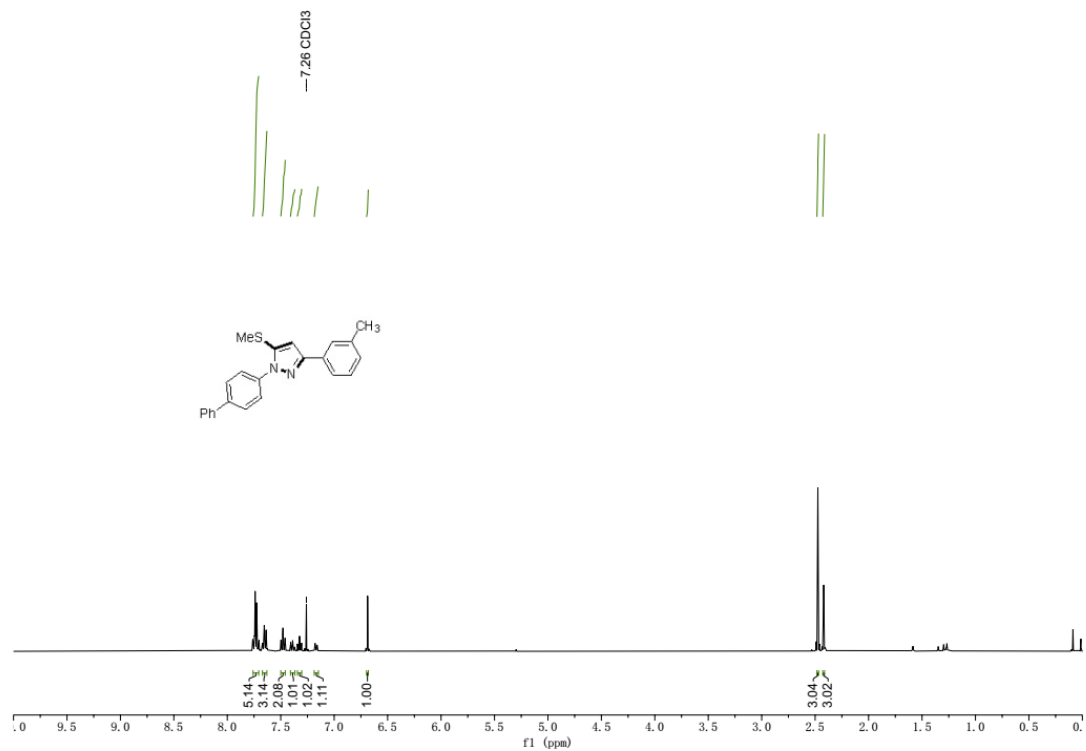

Figure S34.  $^1\text{H NMR}$  (400 MHz,  $\text{CDCl}_3$ ) spectrum of 3ca

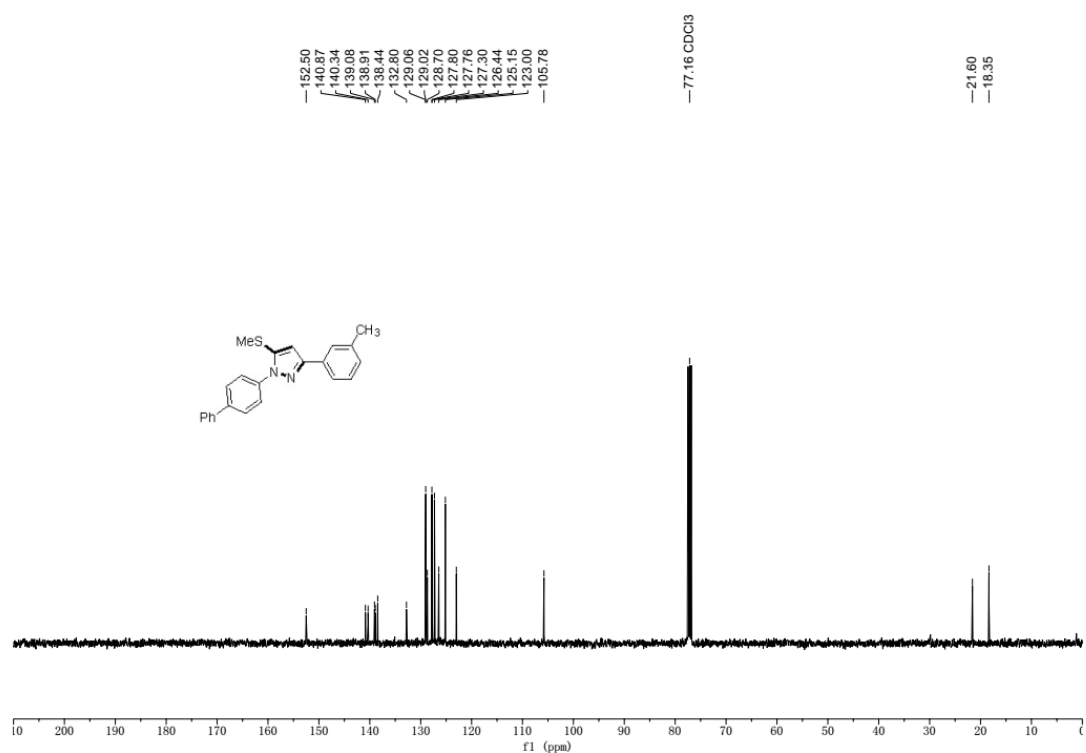

Figure S35.  $^{13}\text{C NMR}$  (100 MHz,  $\text{CDCl}_3$ ) spectrum of 3ca

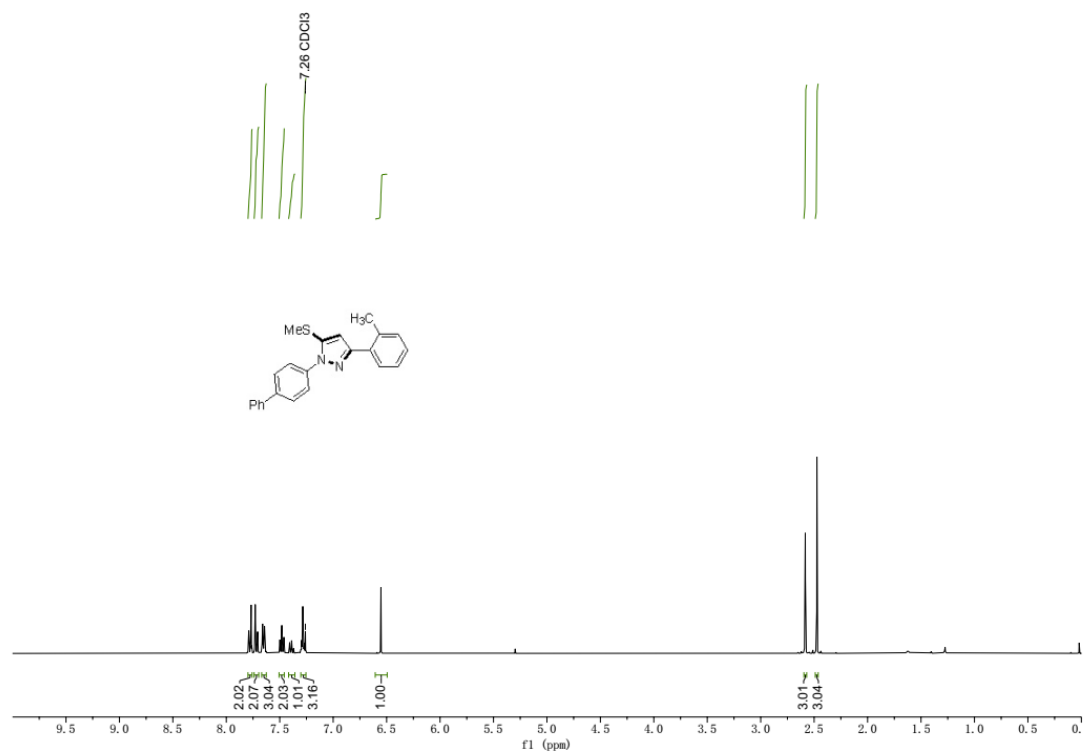

Figure S36.  $^1\text{H NMR}$  (400 MHz,  $\text{CDCl}_3$ ) spectrum of 3da

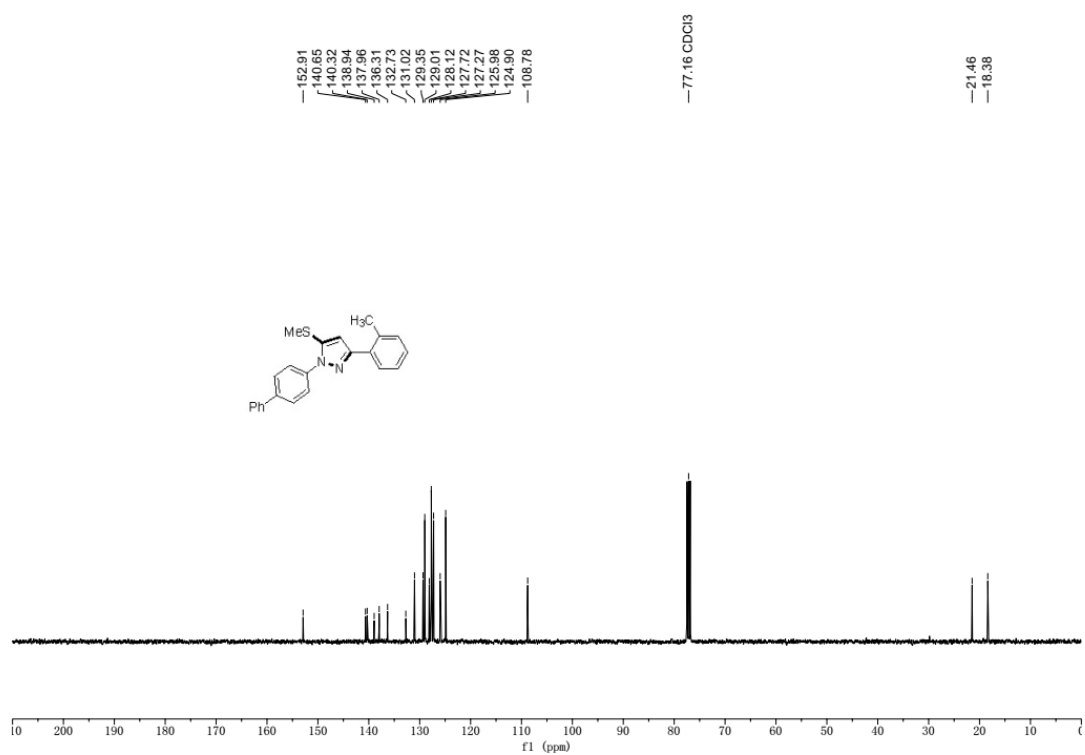

Figure S37.  $^{13}\text{C NMR}$  (100 MHz,  $\text{CDCl}_3$ ) spectrum of 3da

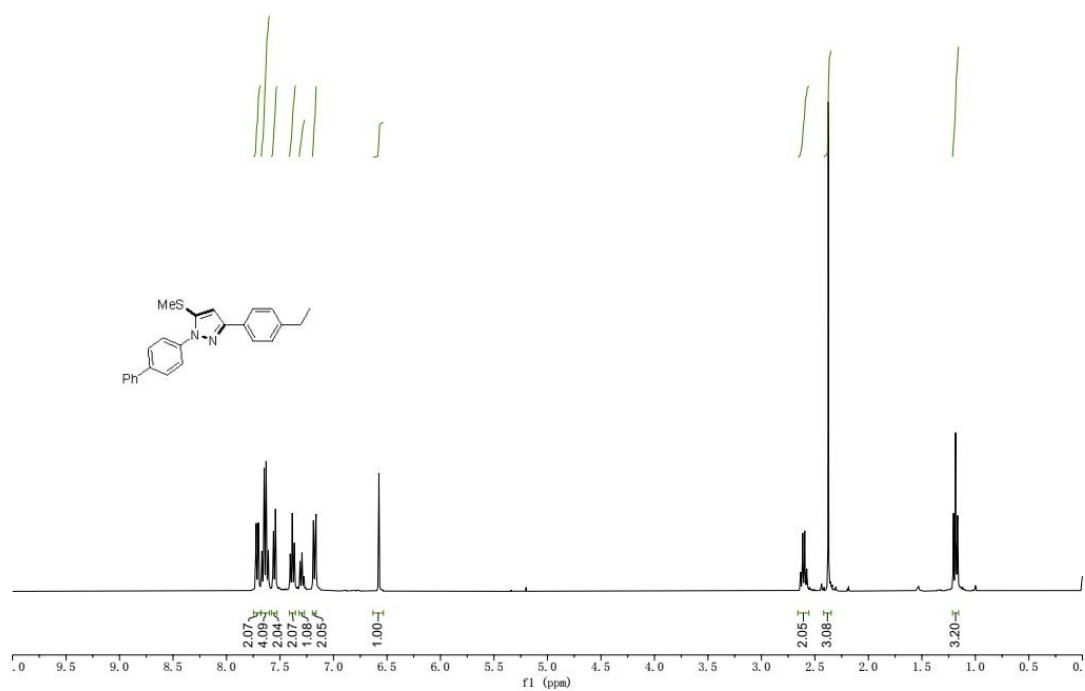

Figure S38. <sup>1</sup>H NMR (400 MHz, CDCl<sub>3</sub>) spectrum of 3ea

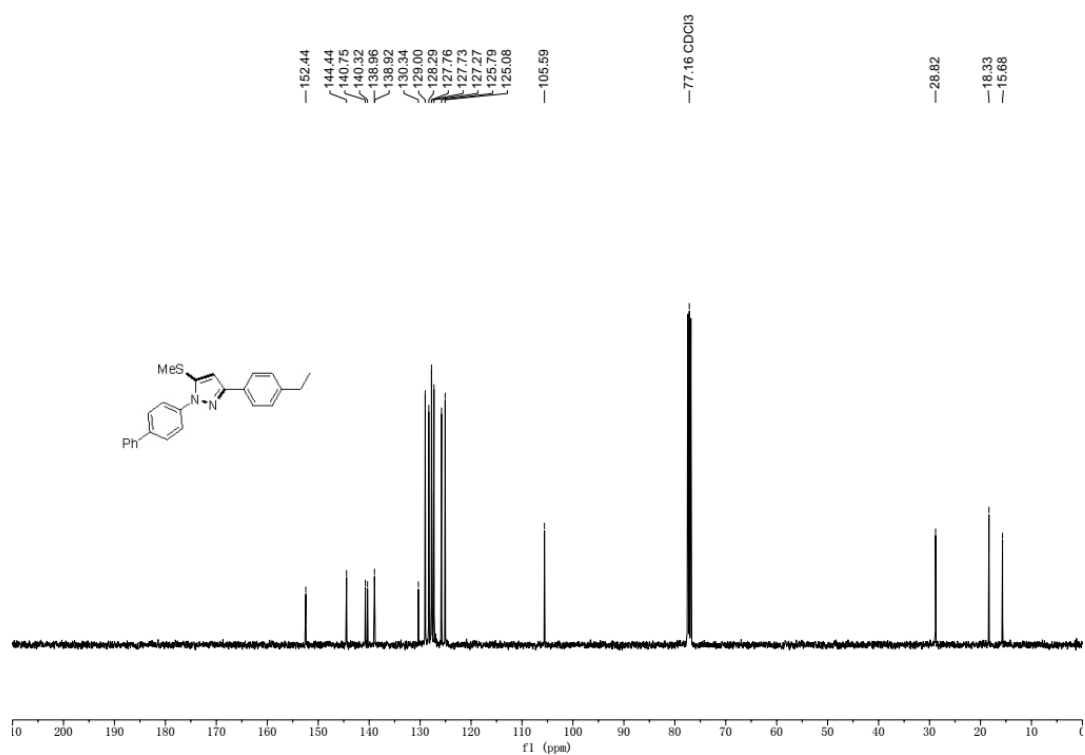

Figure S39. <sup>13</sup>C NMR (100 MHz, CDCl<sub>3</sub>) spectrum of 3ea

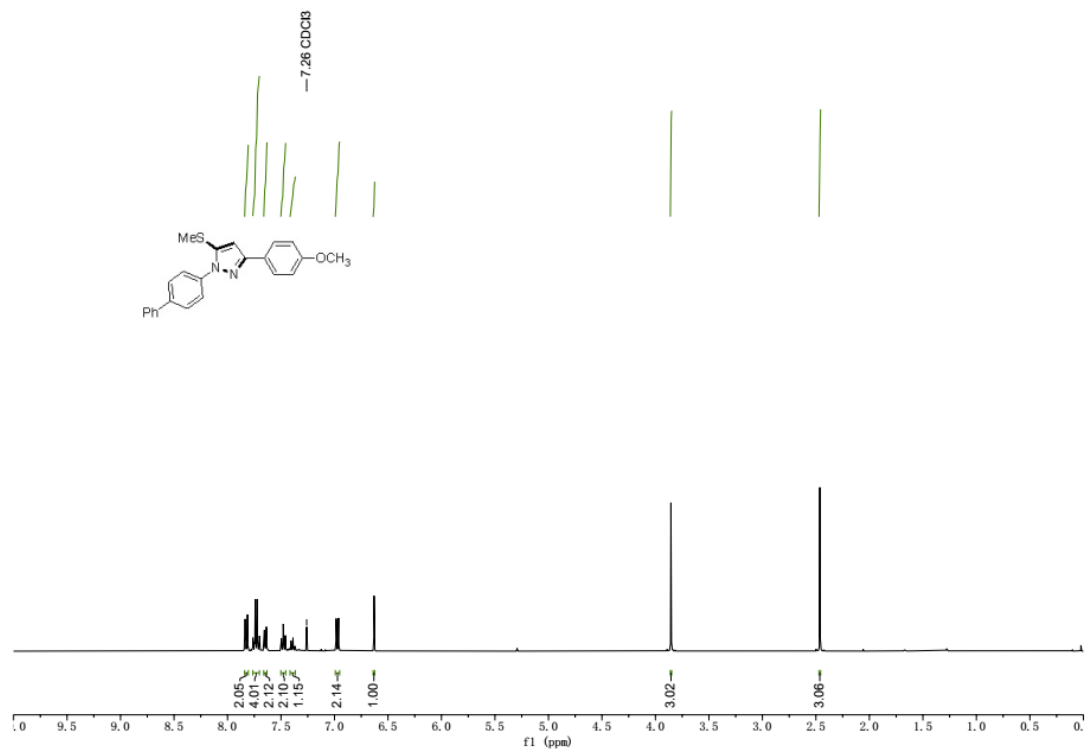

Figure S40. <sup>1</sup>H NMR (400 MHz, CDCl<sub>3</sub>) spectrum of 3fa

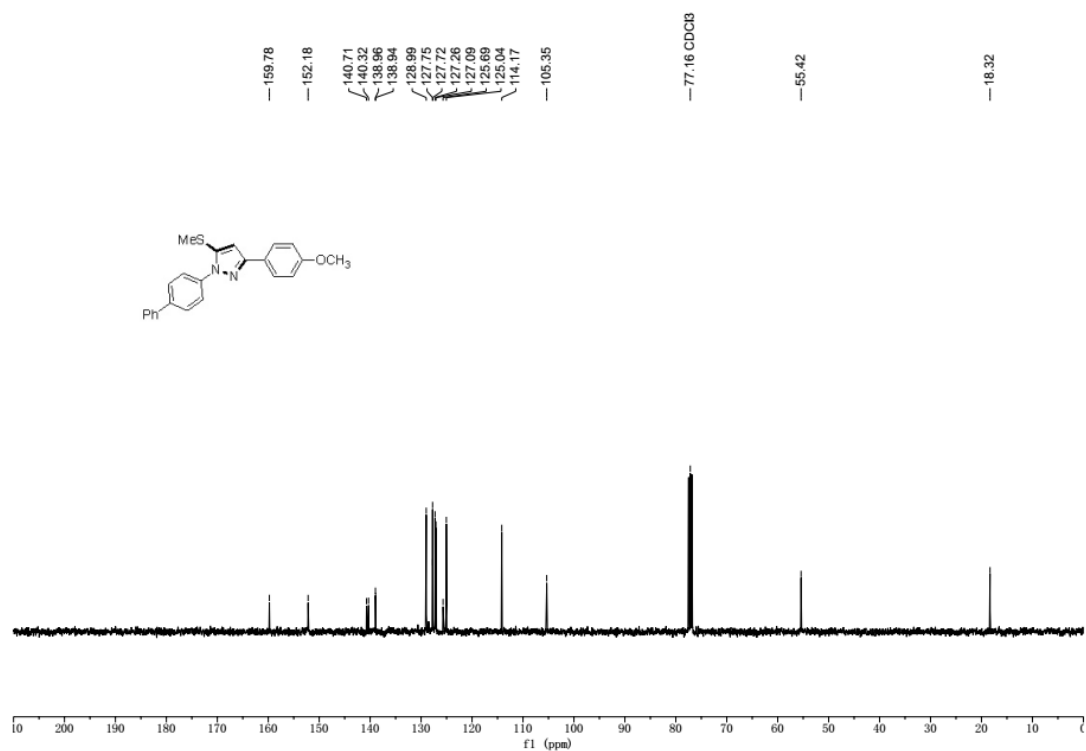

Figure S41. <sup>13</sup>C NMR (100 MHz, CDCl<sub>3</sub>) spectrum of 3fa

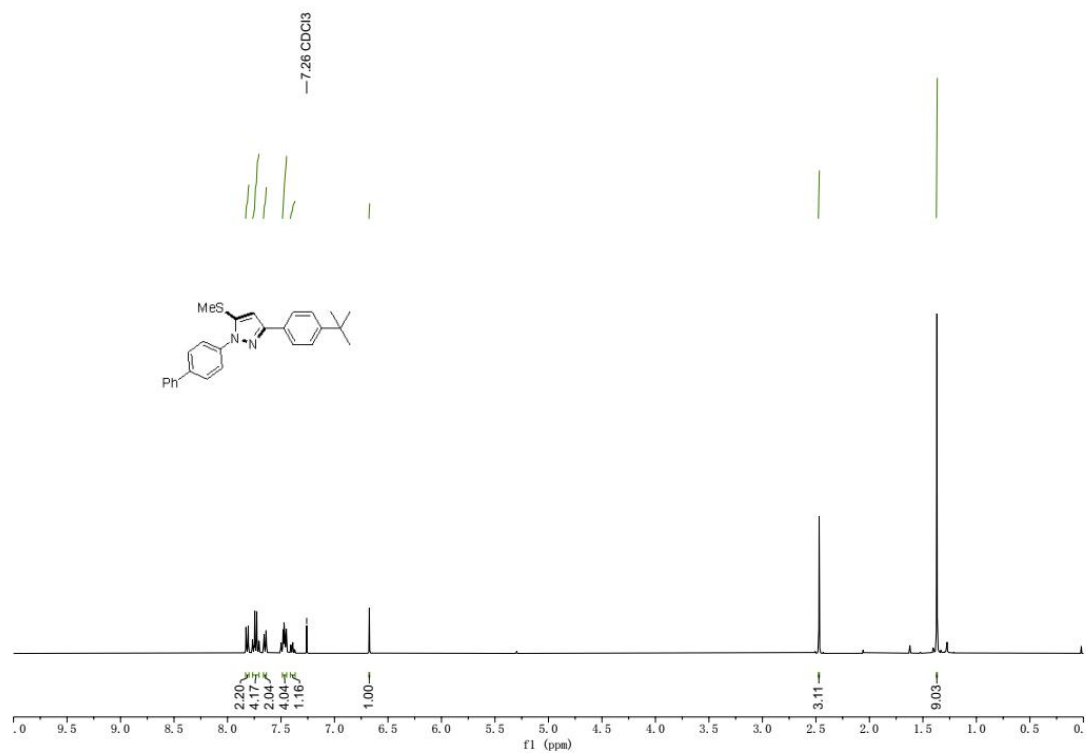

Figure S42.  $^1\text{H NMR}$  (400 MHz,  $\text{CDCl}_3$ ) spectrum of 3ga

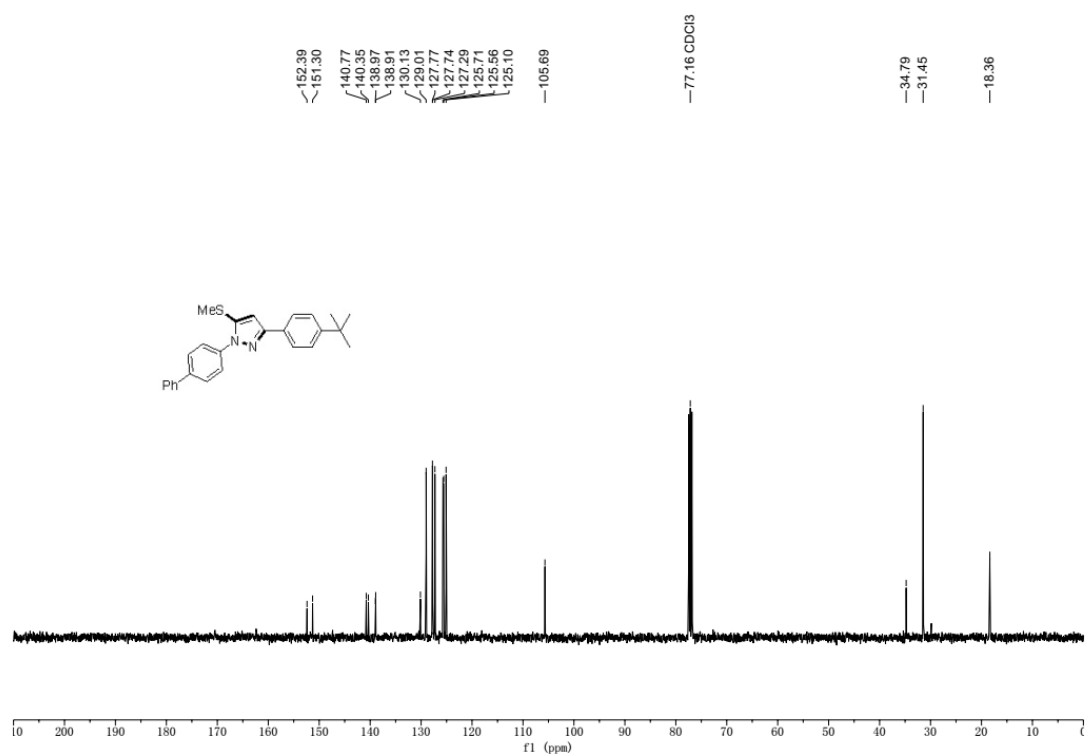

Figure S43.  $^{13}\text{C NMR}$  (100 MHz,  $\text{CDCl}_3$ ) spectrum of 3ga

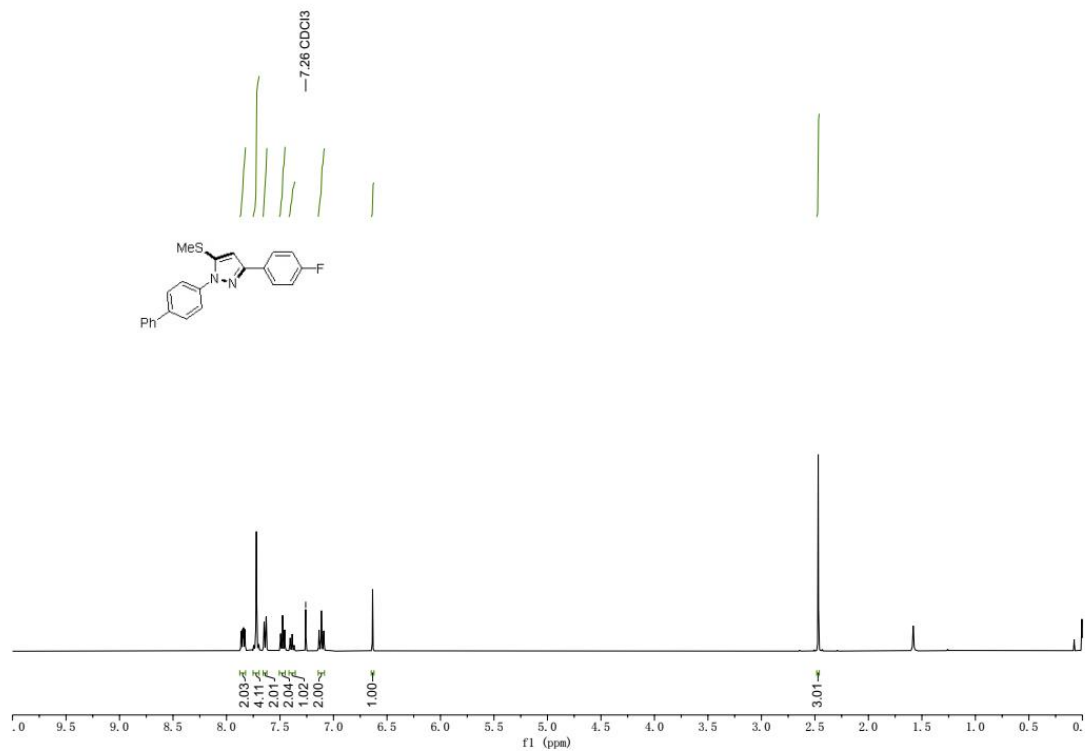

Figure S44. <sup>1</sup>H NMR (400 MHz, CDCl<sub>3</sub>) spectrum of 3ha

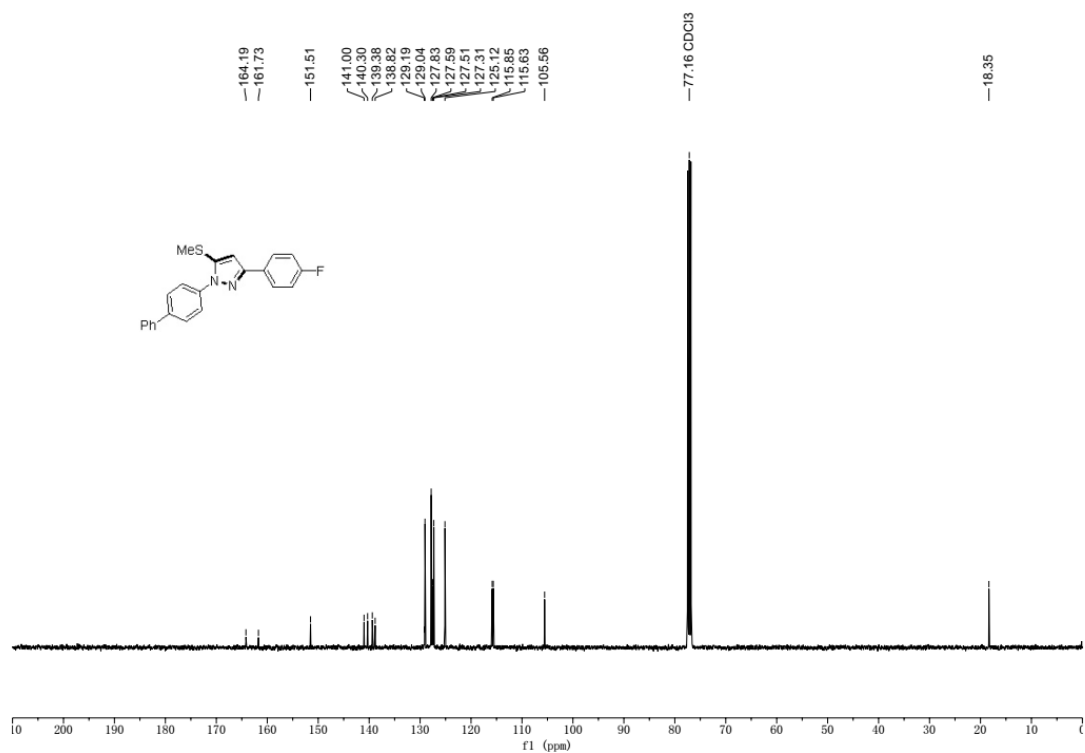

Figure S45. <sup>13</sup>C NMR (100 MHz, CDCl<sub>3</sub>) spectrum of 3ha



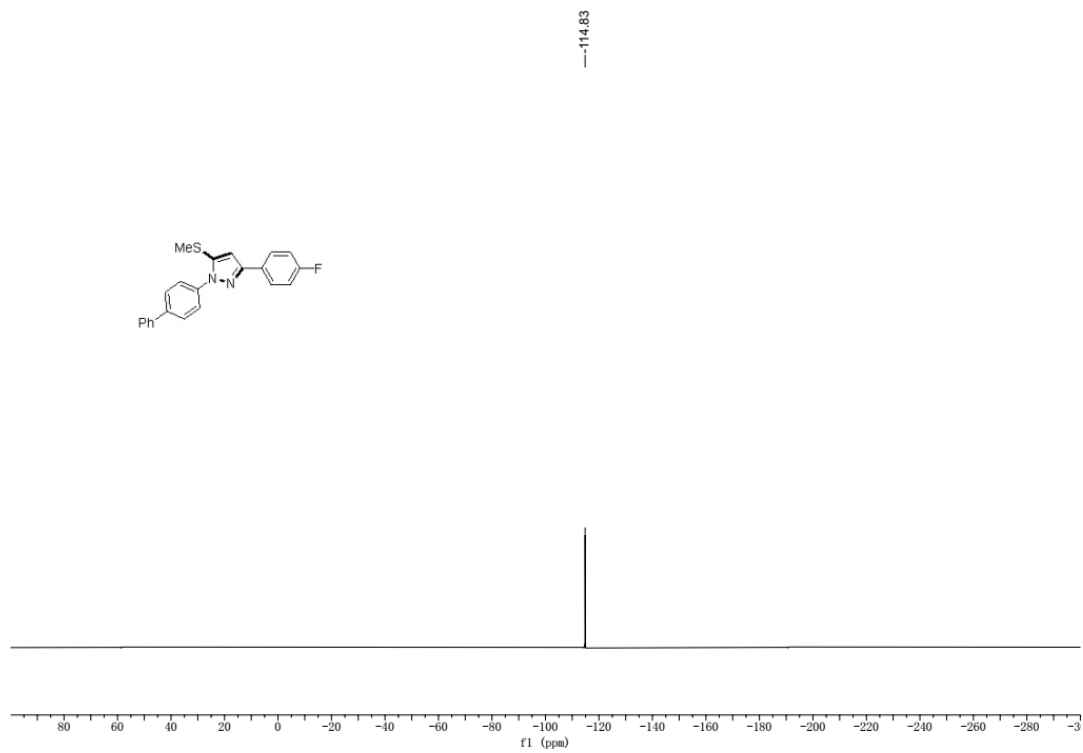

**Figure S46.**  $^{19}\text{F}$  NMR (376 MHz,  $\text{CDCl}_3$ ) spectrum of (3ha)

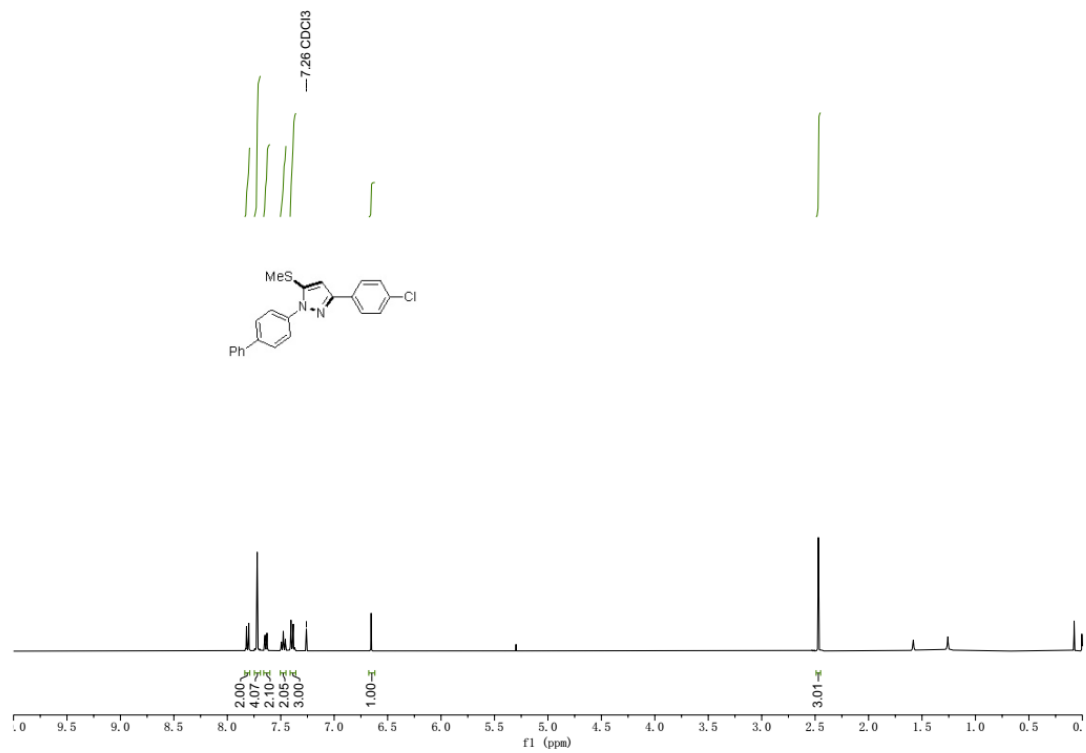

Figure S47. <sup>1</sup>H NMR (400 MHz, CDCl<sub>3</sub>) spectrum of 3ia

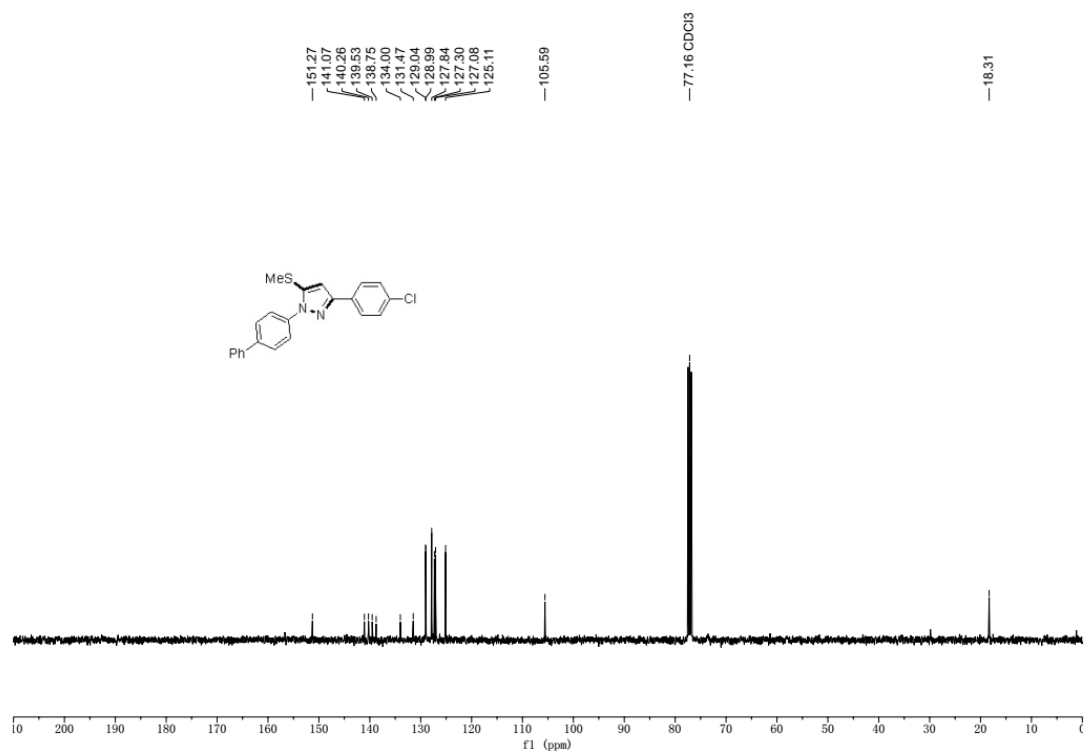

Figure S48. <sup>13</sup>C NMR (100 MHz, CDCl<sub>3</sub>) spectrum of 3ia

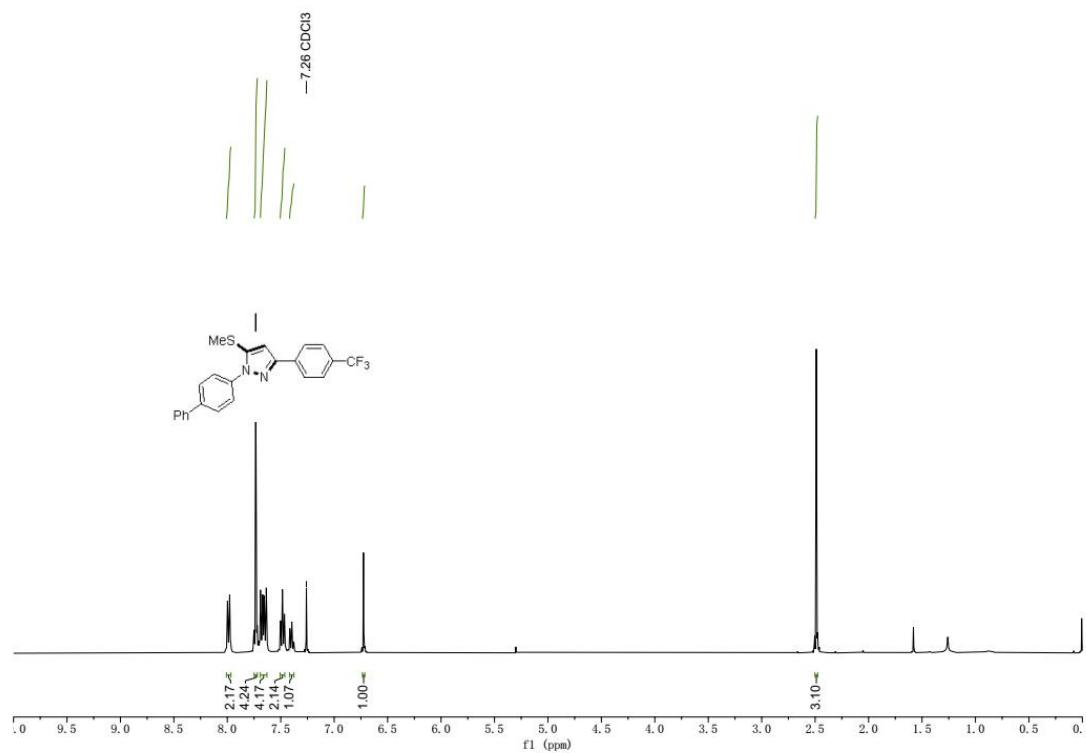

Figure S49. <sup>1</sup>H NMR (400 MHz, CDCl<sub>3</sub>) spectrum of 3ja

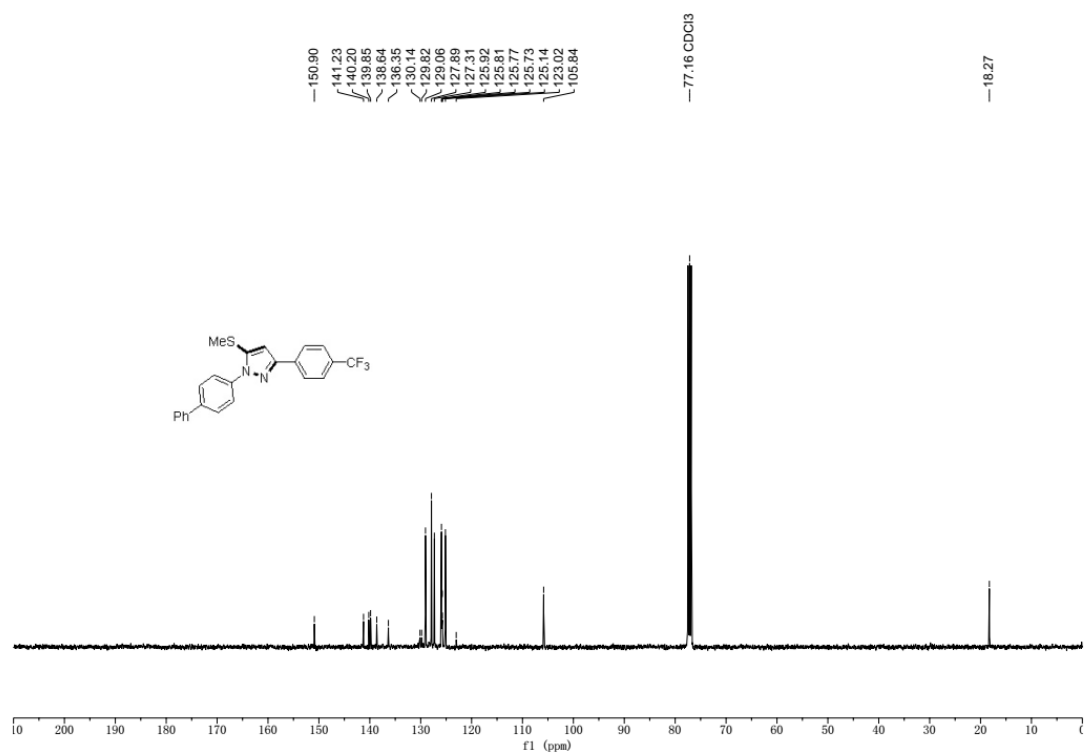

Figure S50. <sup>13</sup>C NMR (100 MHz, CDCl<sub>3</sub>) spectrum of 3ja

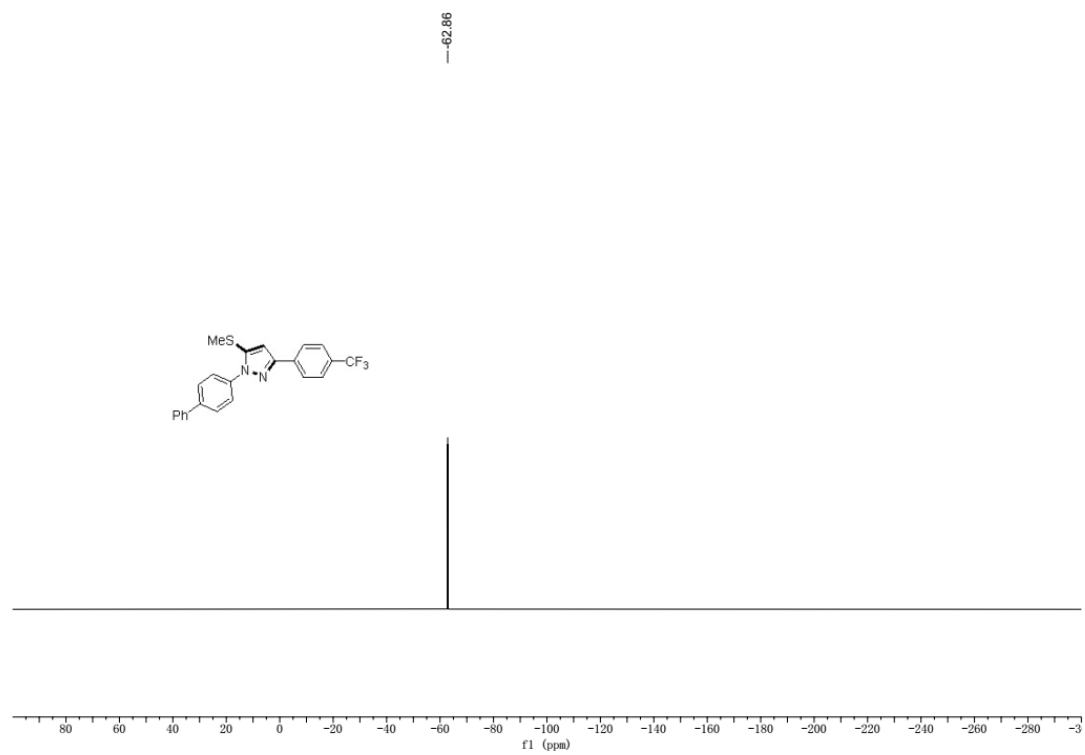

**Figure S51.**  $^{19}\text{F}$  NMR (376 MHz,  $\text{CDCl}_3$ ) spectrum of (3ja)

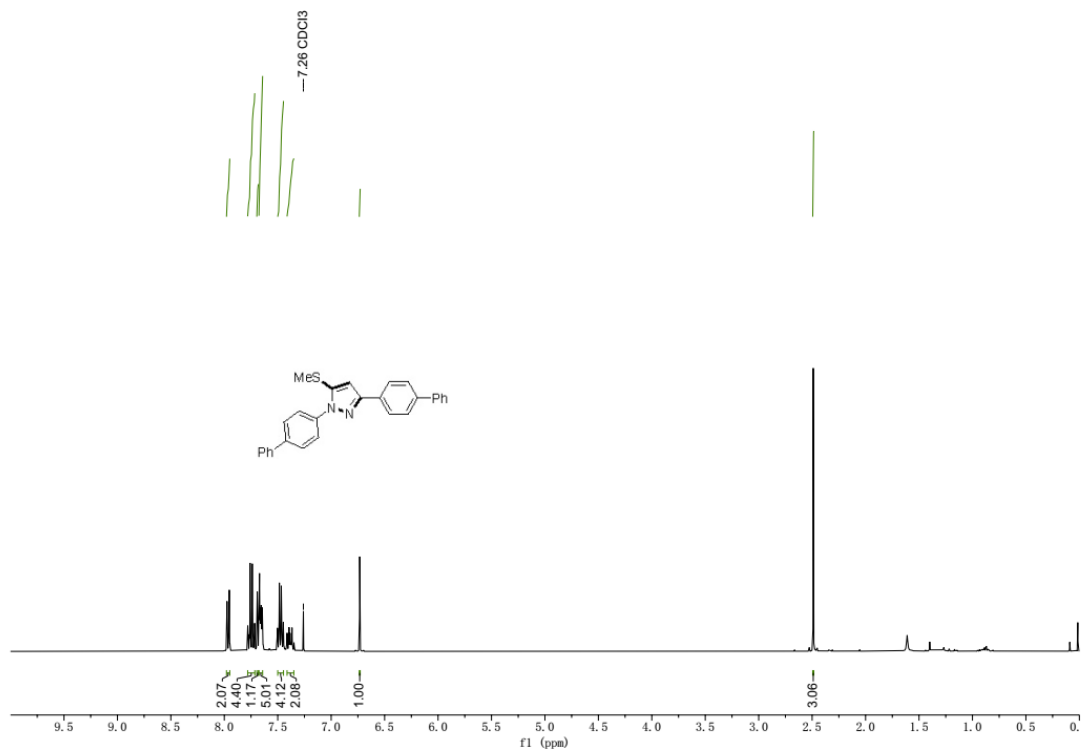

Figure S52. <sup>1</sup>H NMR (400 MHz, CDCl<sub>3</sub>) spectrum of 3ka

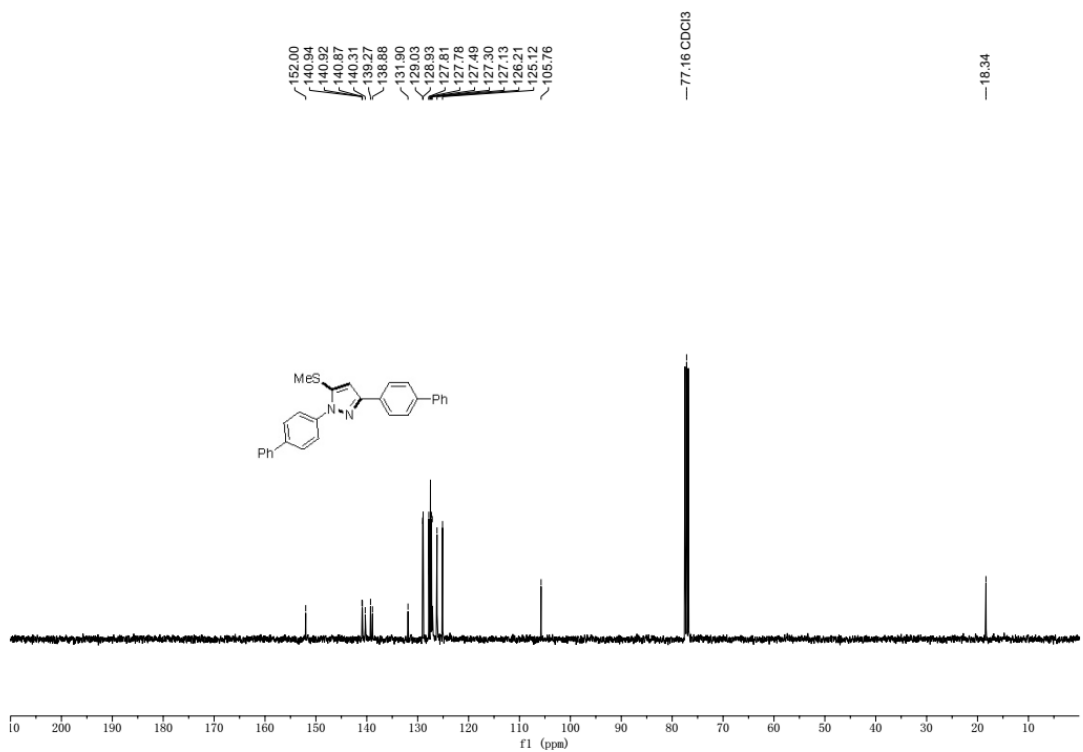

Figure S53. <sup>13</sup>C NMR (100 MHz, CDCl<sub>3</sub>) spectrum of 3ka

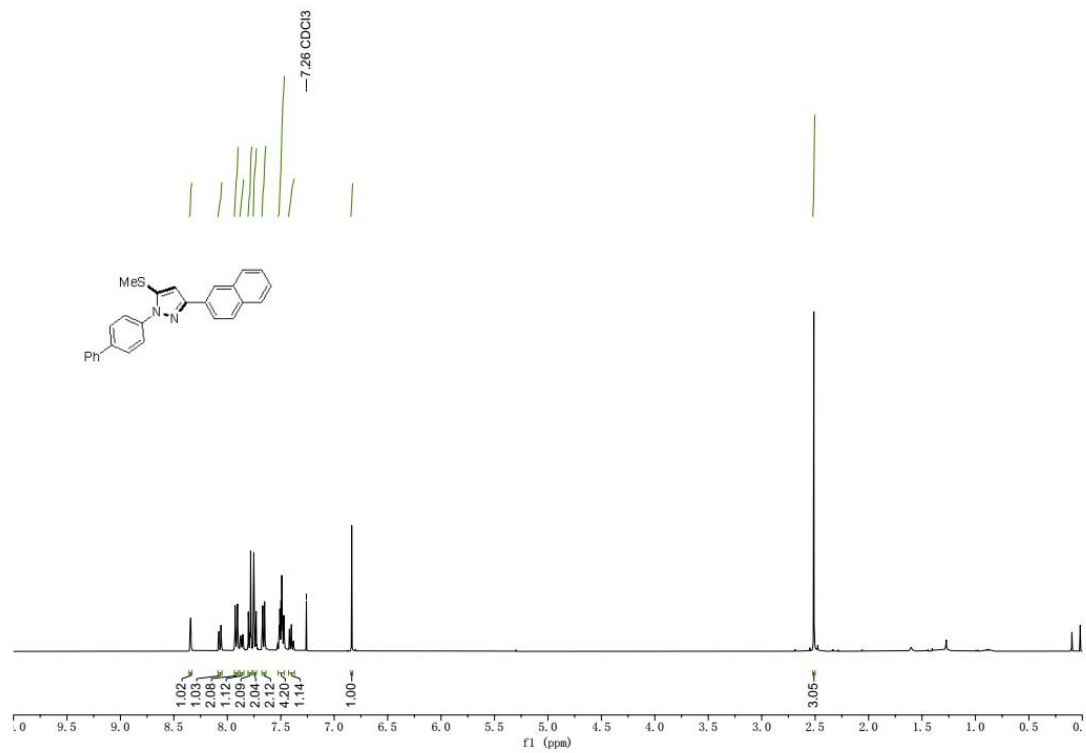

Figure S54.  $^1\text{H NMR}$  (400 MHz,  $\text{CDCl}_3$ ) spectrum of 3la

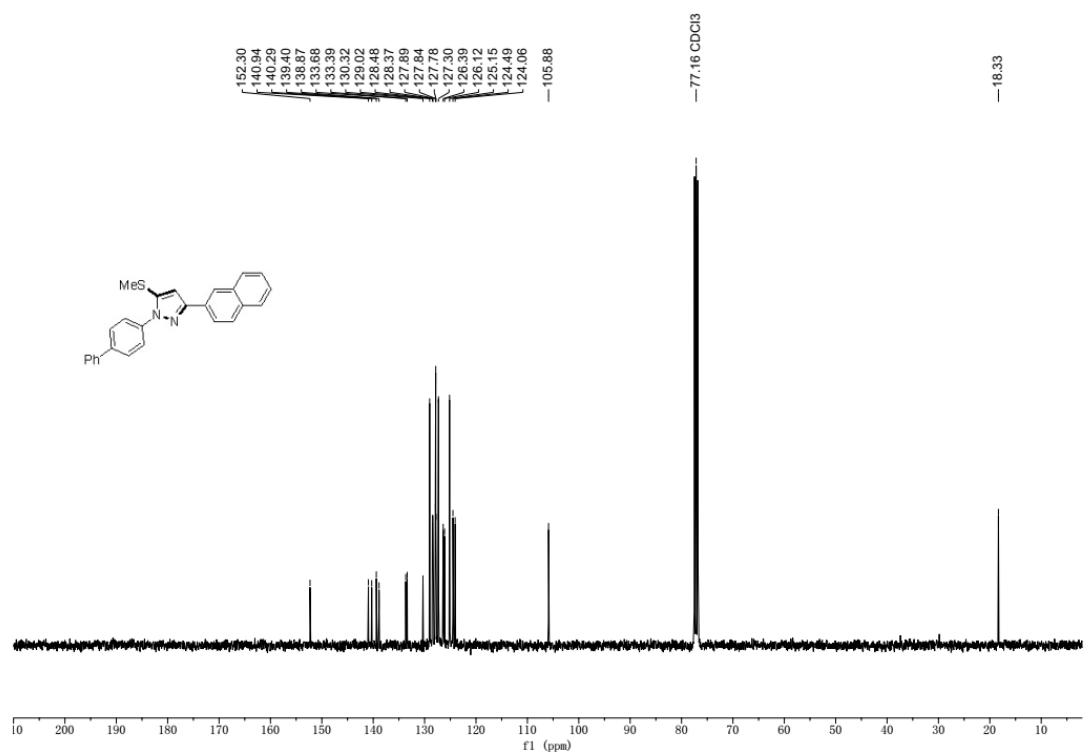

Figure S55.  $^{13}\text{C NMR}$  (100 MHz,  $\text{CDCl}_3$ ) spectrum of 3la

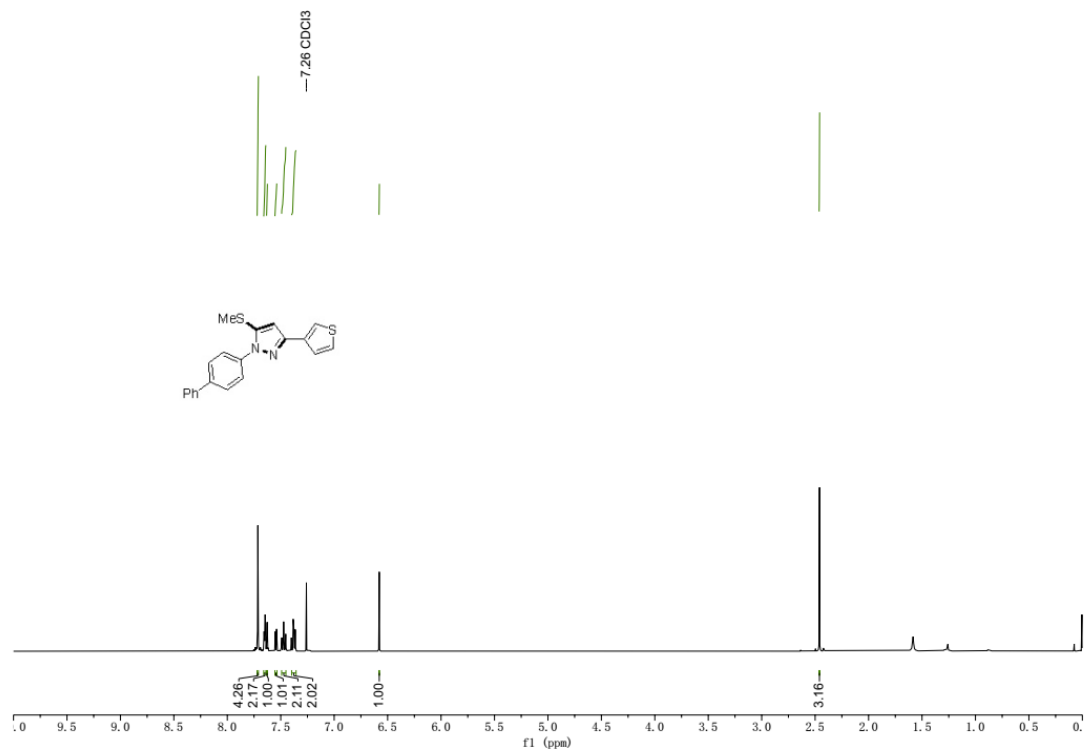

Figure S56.  $^1\text{H NMR}$  (400 MHz,  $\text{CDCl}_3$ ) spectrum of 3ma

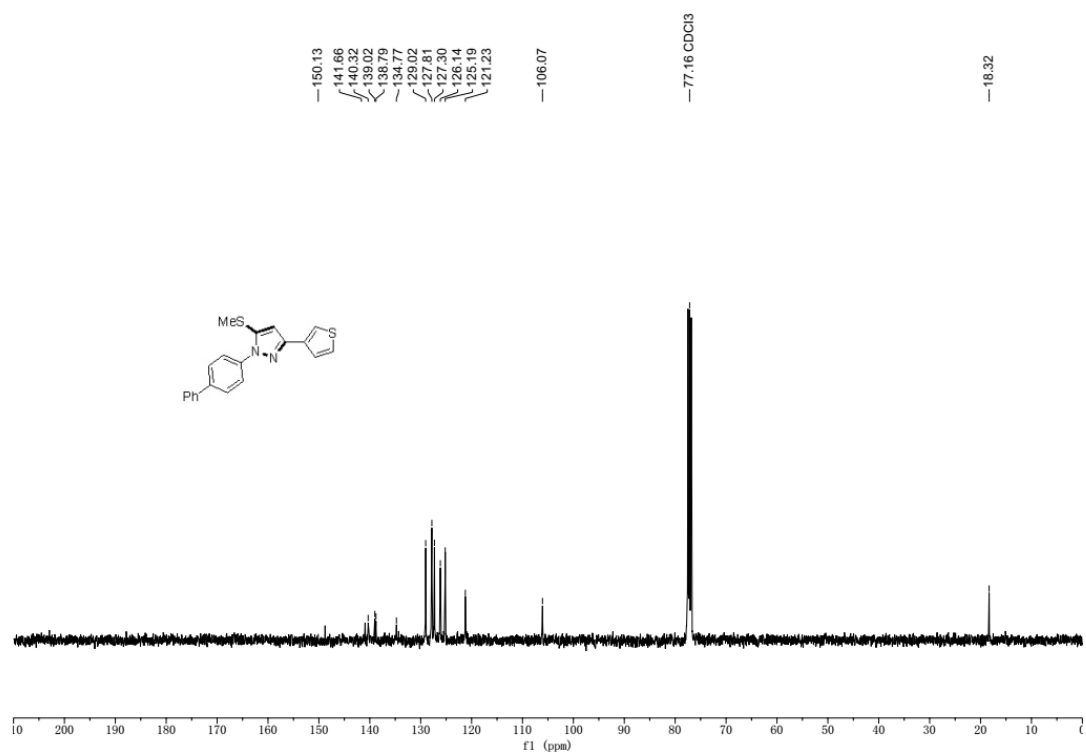

Figure S57.  $^{13}\text{C NMR}$  (100 MHz,  $\text{CDCl}_3$ ) spectrum of 3ma

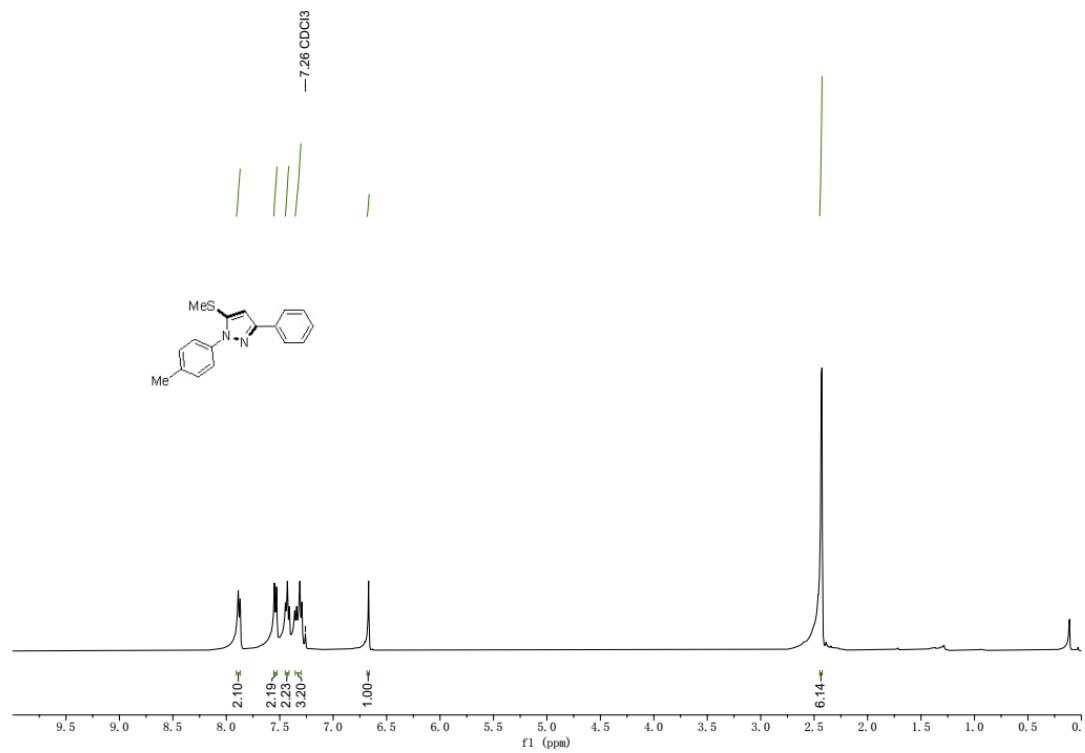

Figure S58.  $^1\text{H NMR}$  (400 MHz,  $\text{CDCl}_3$ ) spectrum of 3ab

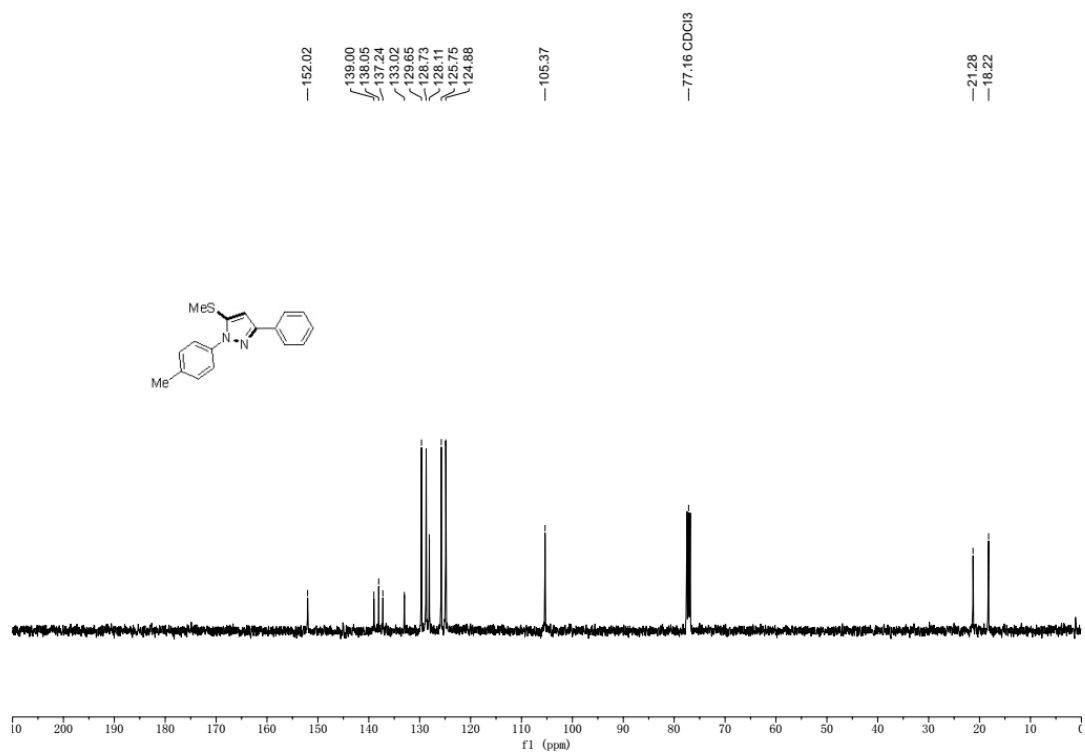

Figure S59.  $^{13}\text{C NMR}$  (100 MHz,  $\text{CDCl}_3$ ) spectrum of 3ab



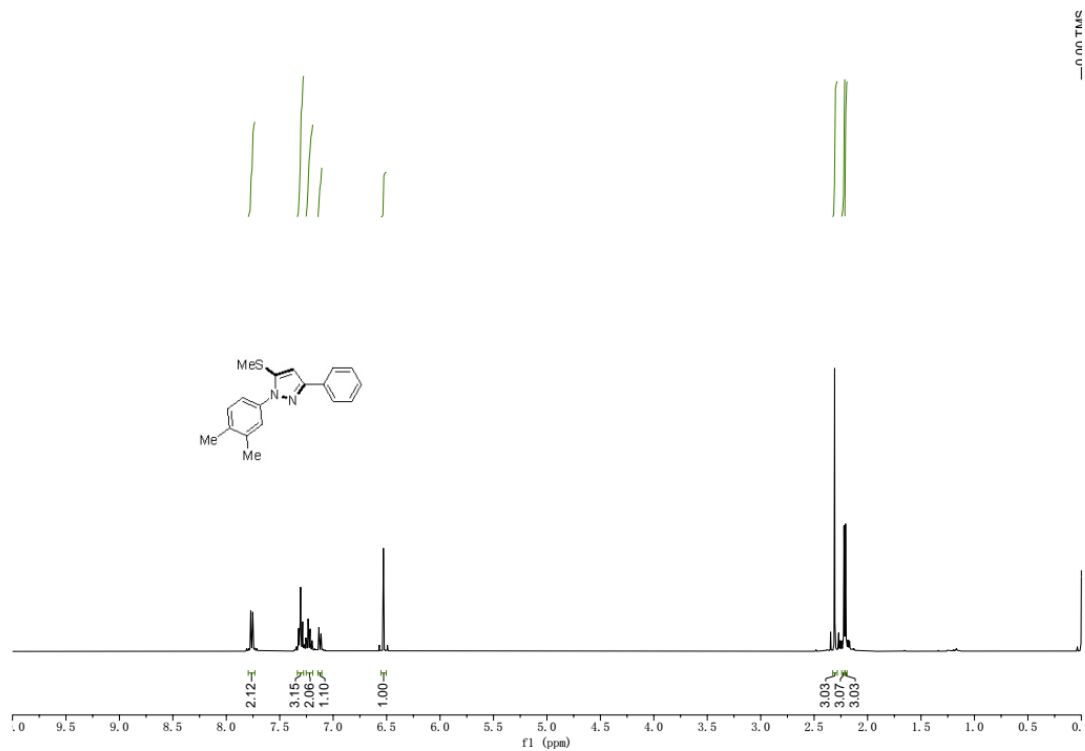

Figure S60. <sup>1</sup>H NMR (400 MHz, CDCl<sub>3</sub>) spectrum of 3ac

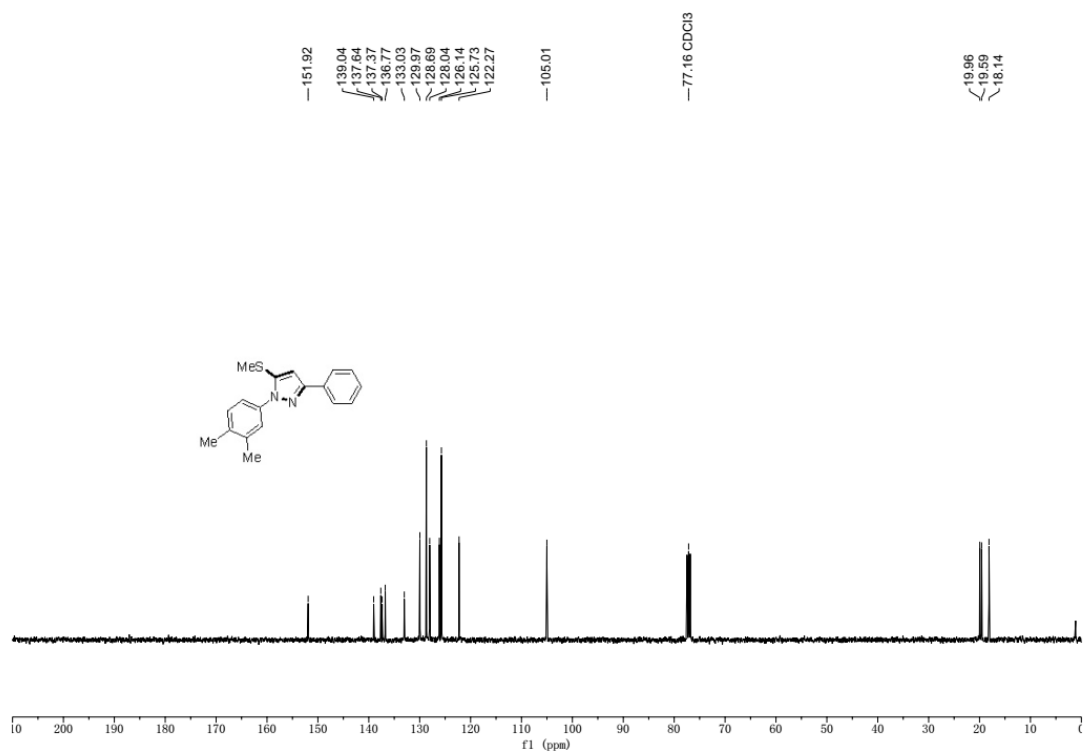

Figure S61. <sup>13</sup>C NMR (100 MHz, CDCl<sub>3</sub>) spectrum of 3ac

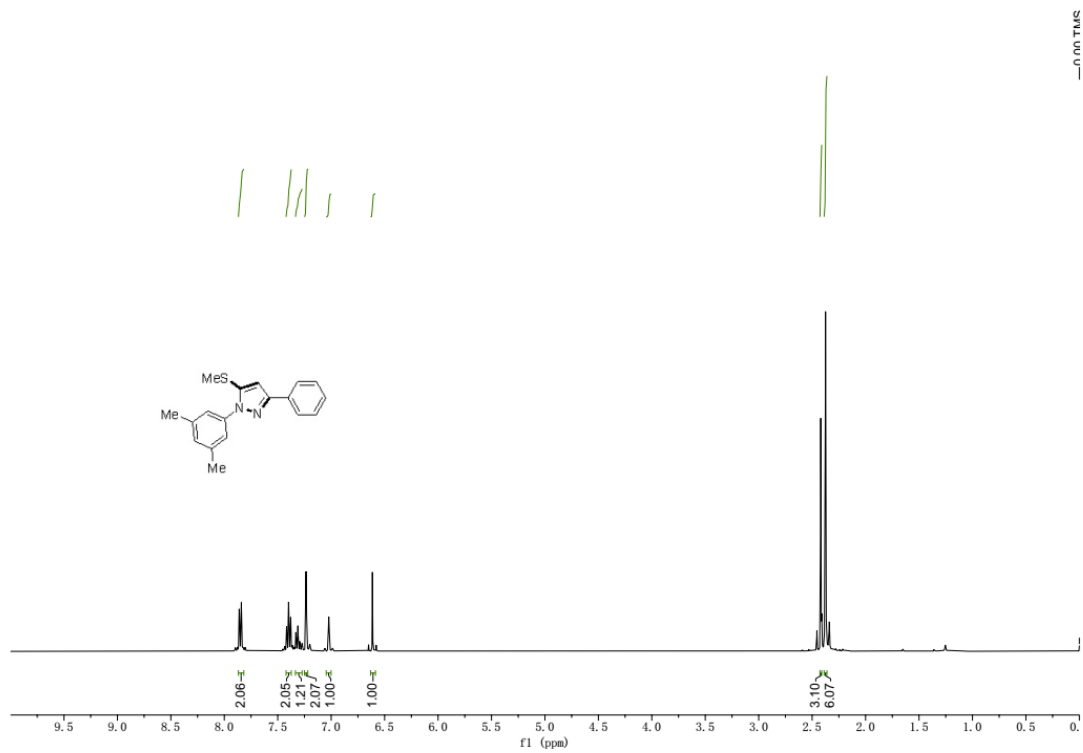

Figure S62. <sup>1</sup>H NMR (400 MHz, CDCl<sub>3</sub>) spectrum of 3ad

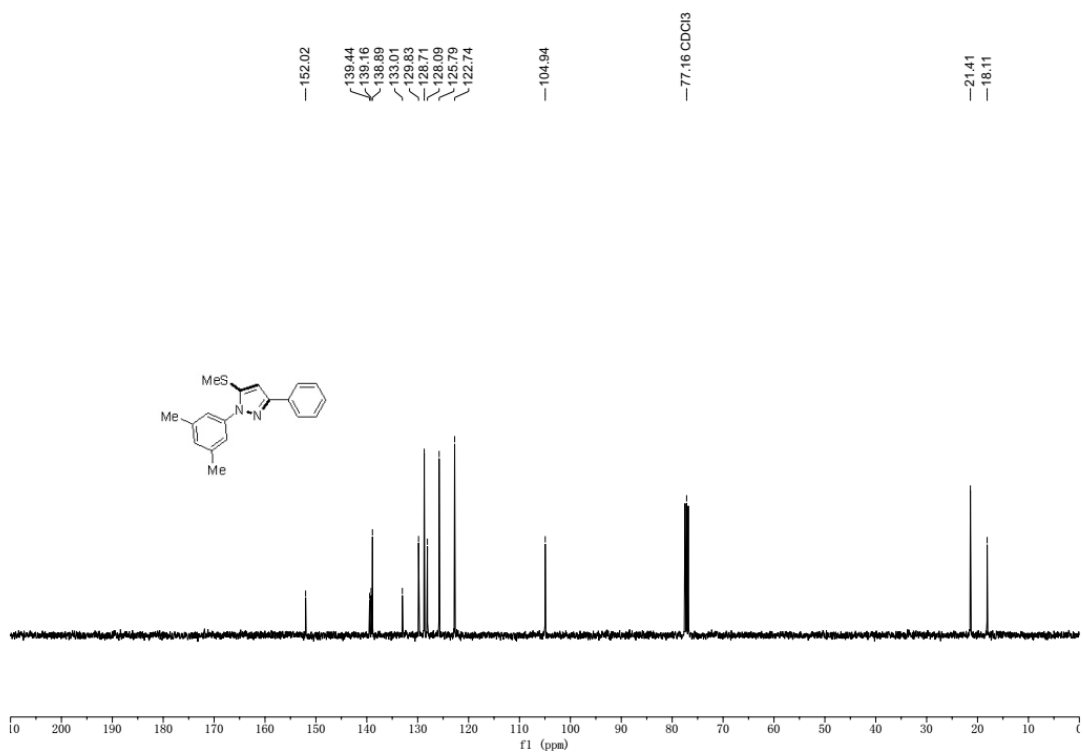

Figure S63. <sup>13</sup>C NMR (100 MHz, CDCl<sub>3</sub>) spectrum of 3ad

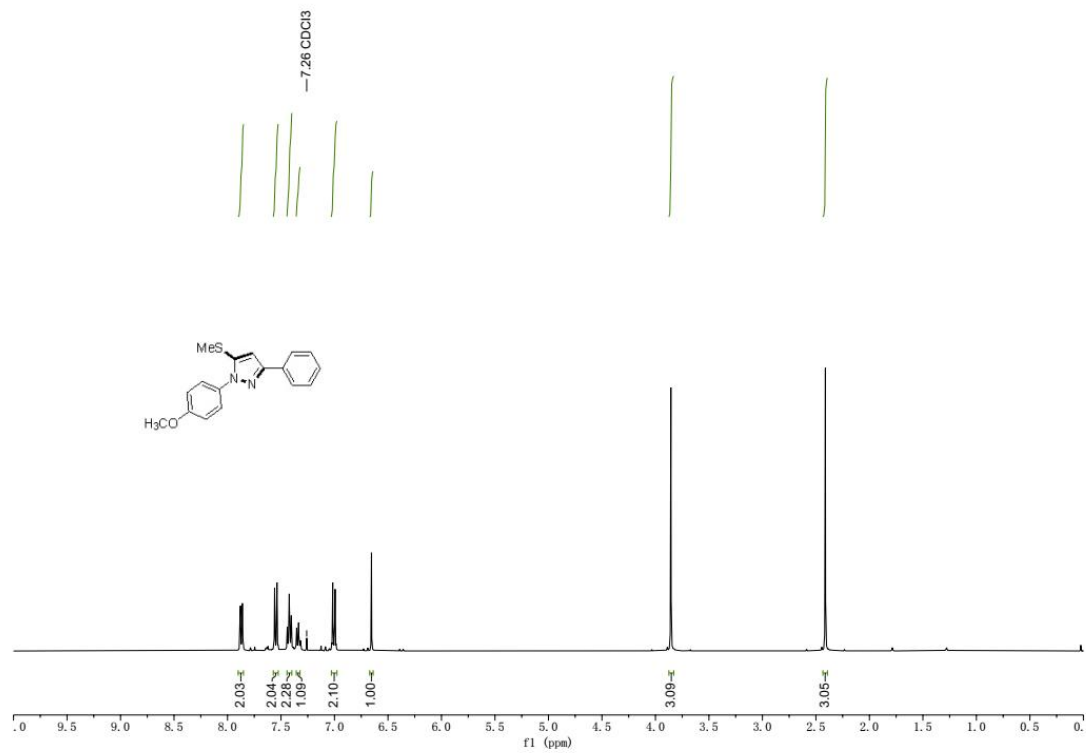

Figure S64.  $^1\text{H NMR}$  (400 MHz,  $\text{CDCl}_3$ ) spectrum of 3ae

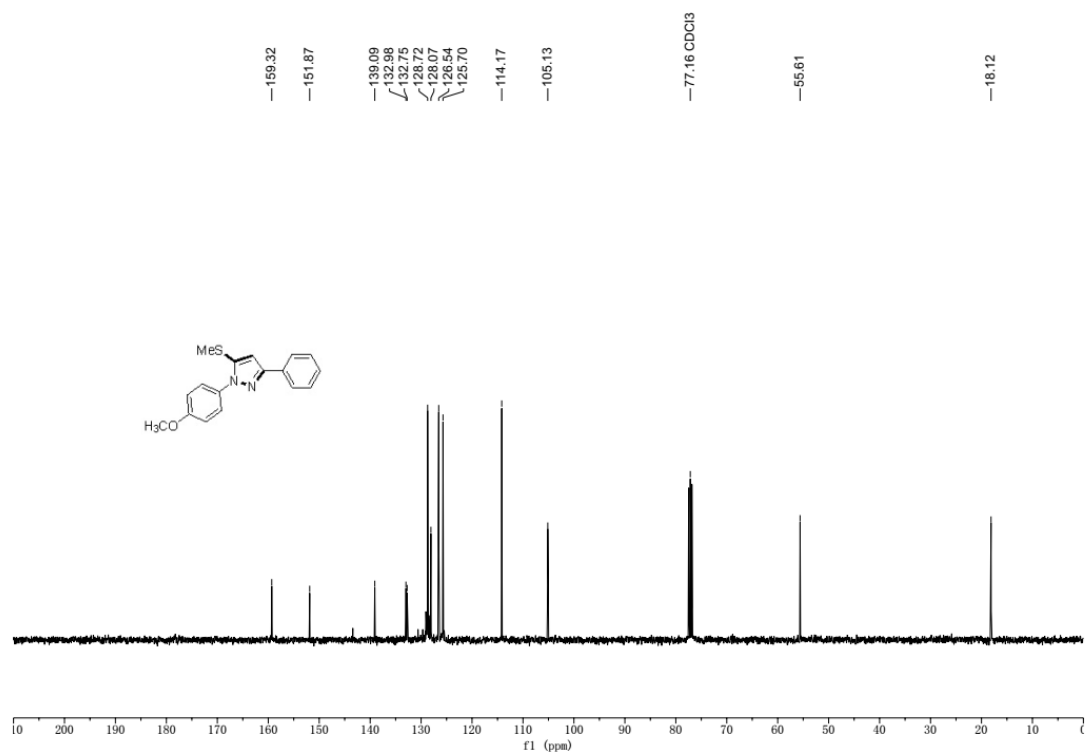

Figure S65.  $^{13}\text{C NMR}$  (100 MHz,  $\text{CDCl}_3$ ) spectrum of 3ae

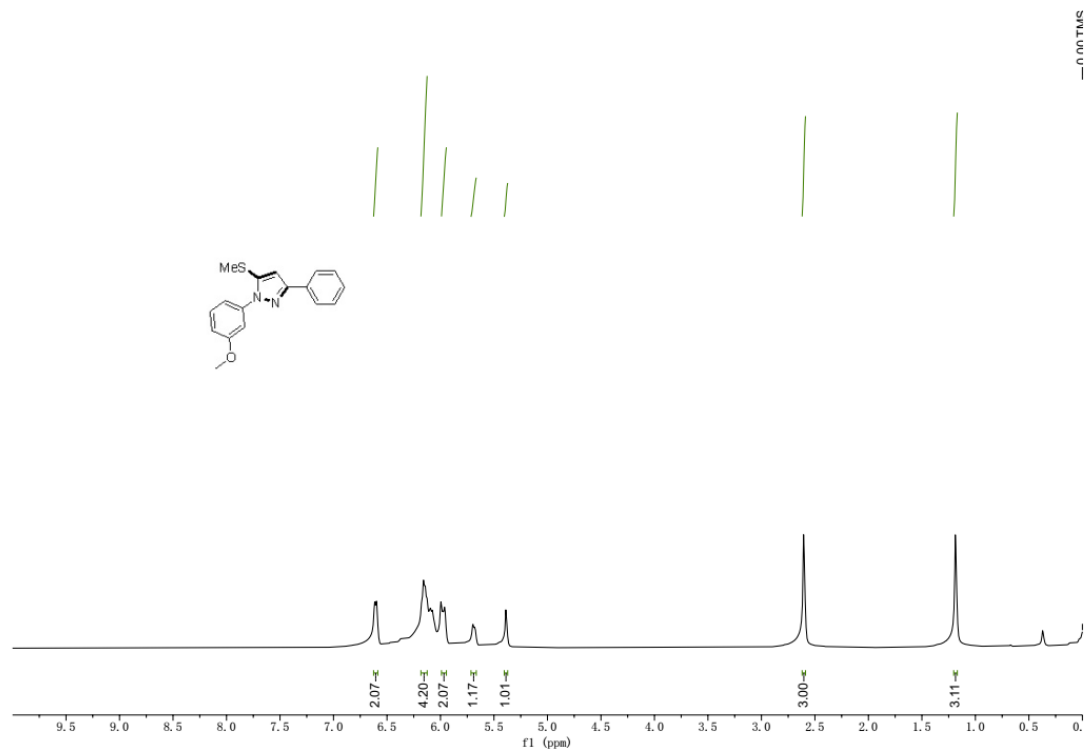

Figure S66. <sup>1</sup>H NMR (400 MHz, CDCl<sub>3</sub>) spectrum of 3af

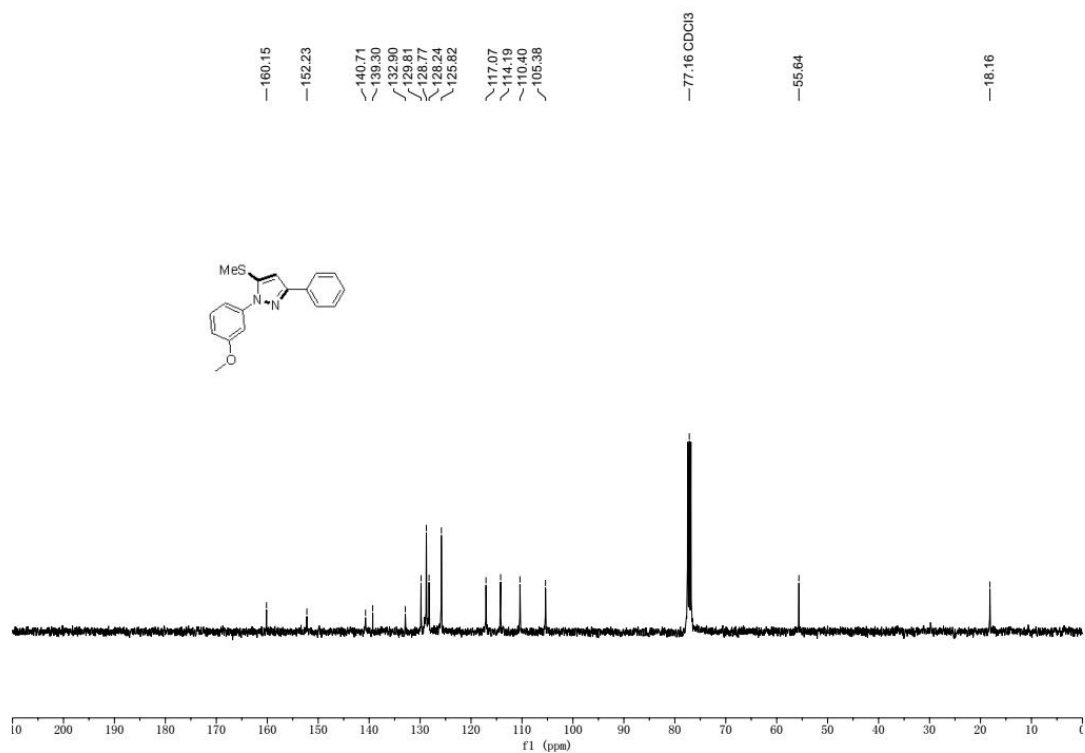

Figure S67. <sup>13</sup>C NMR (100 MHz, CDCl<sub>3</sub>) spectrum of 3af

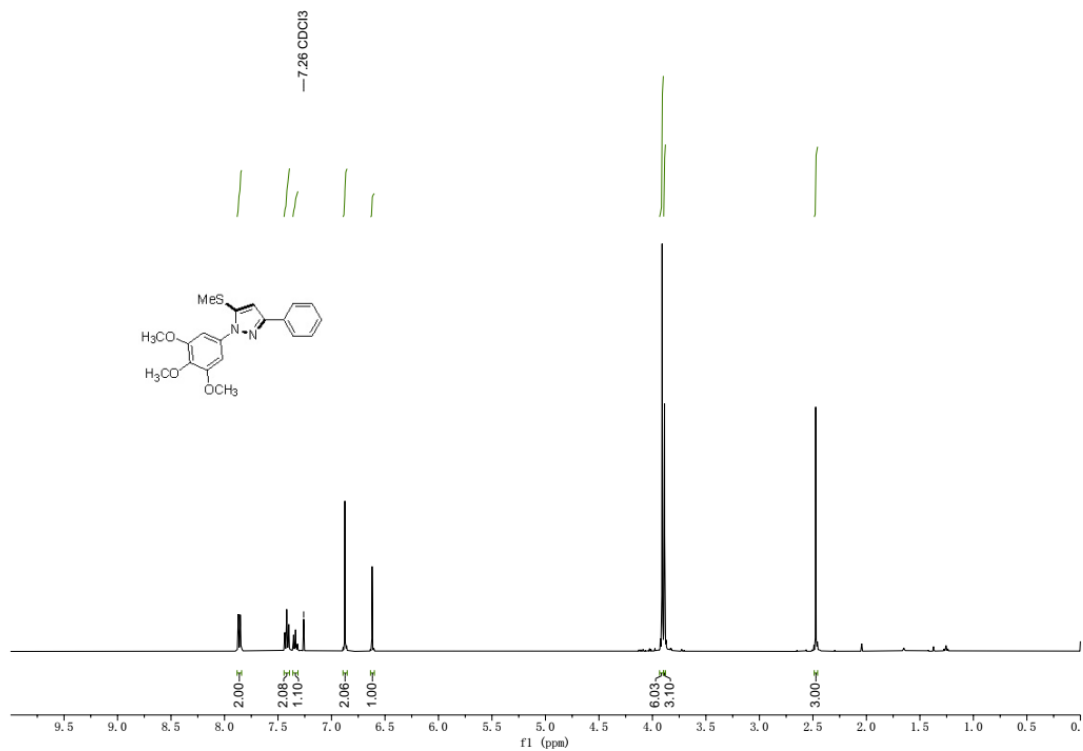

Figure S68. <sup>1</sup>H NMR (400 MHz, CDCl<sub>3</sub>) spectrum of 3ag

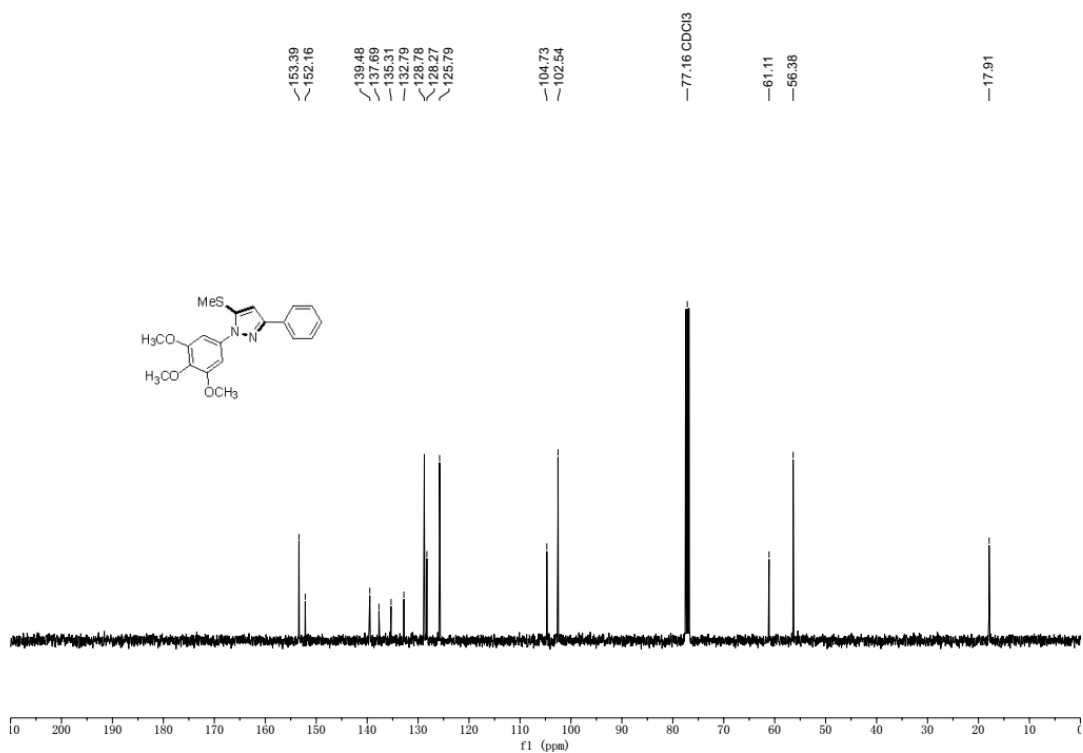

Figure S69. <sup>13</sup>C NMR (100 MHz, CDCl<sub>3</sub>) spectrum of 3ag

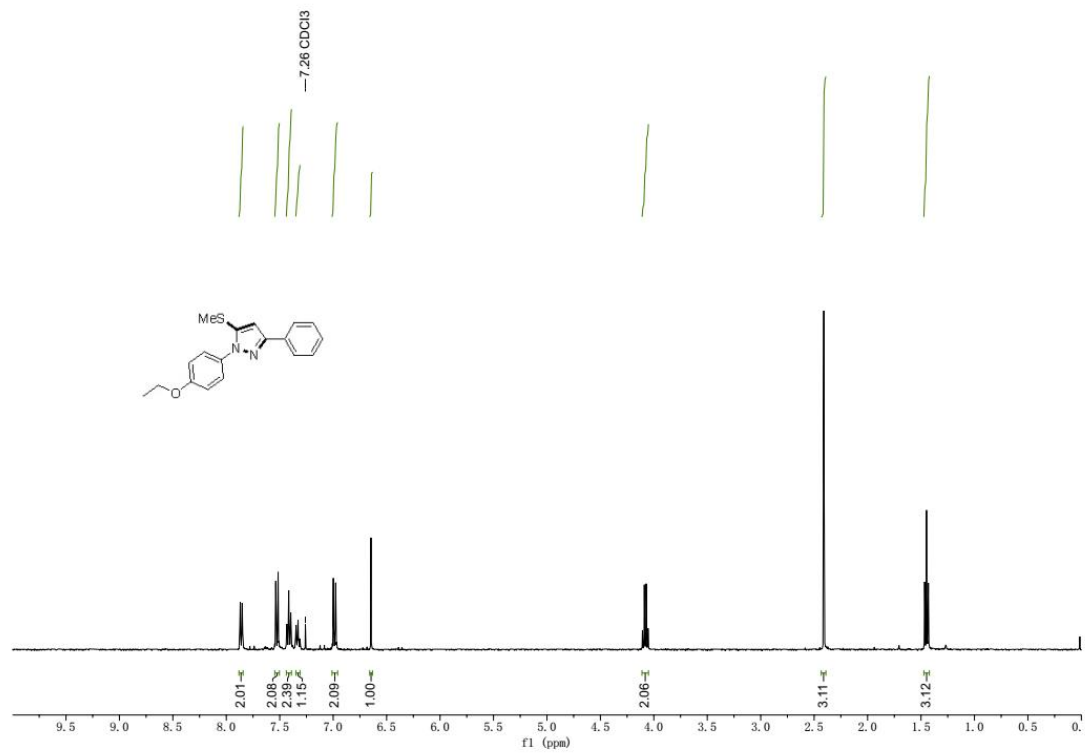

Figure S70. <sup>1</sup>H NMR (400 MHz, CDCl<sub>3</sub>) spectrum of 3ah

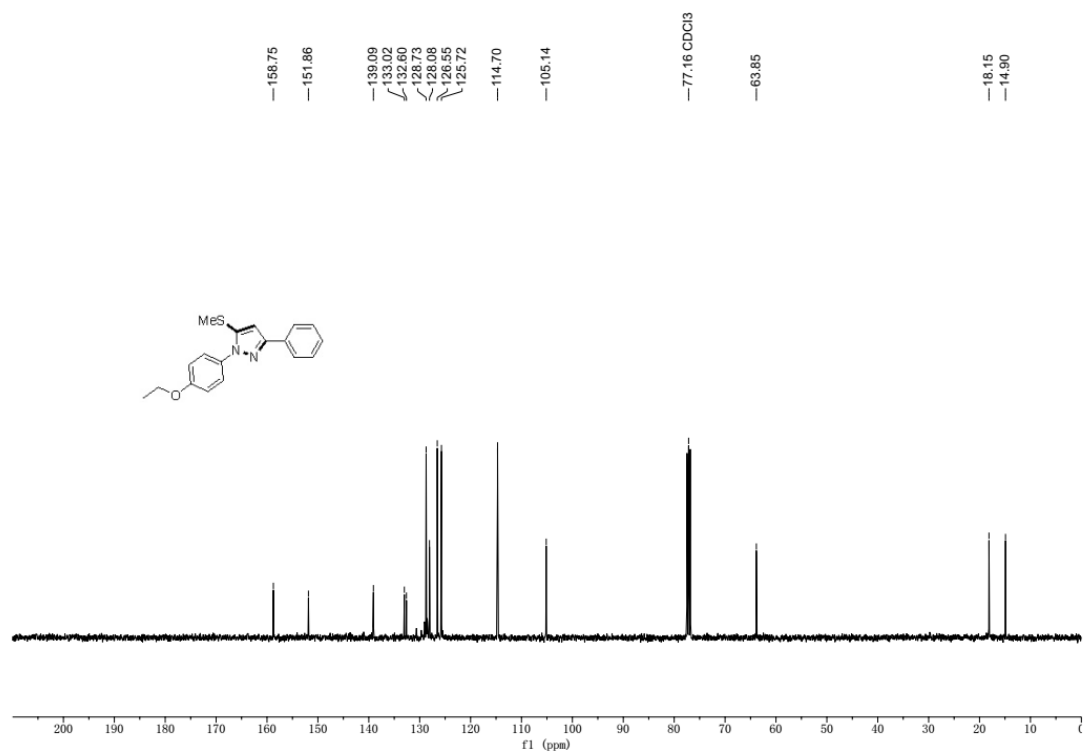

Figure S71. <sup>13</sup>C NMR (100 MHz, CDCl<sub>3</sub>) spectrum of 3ah

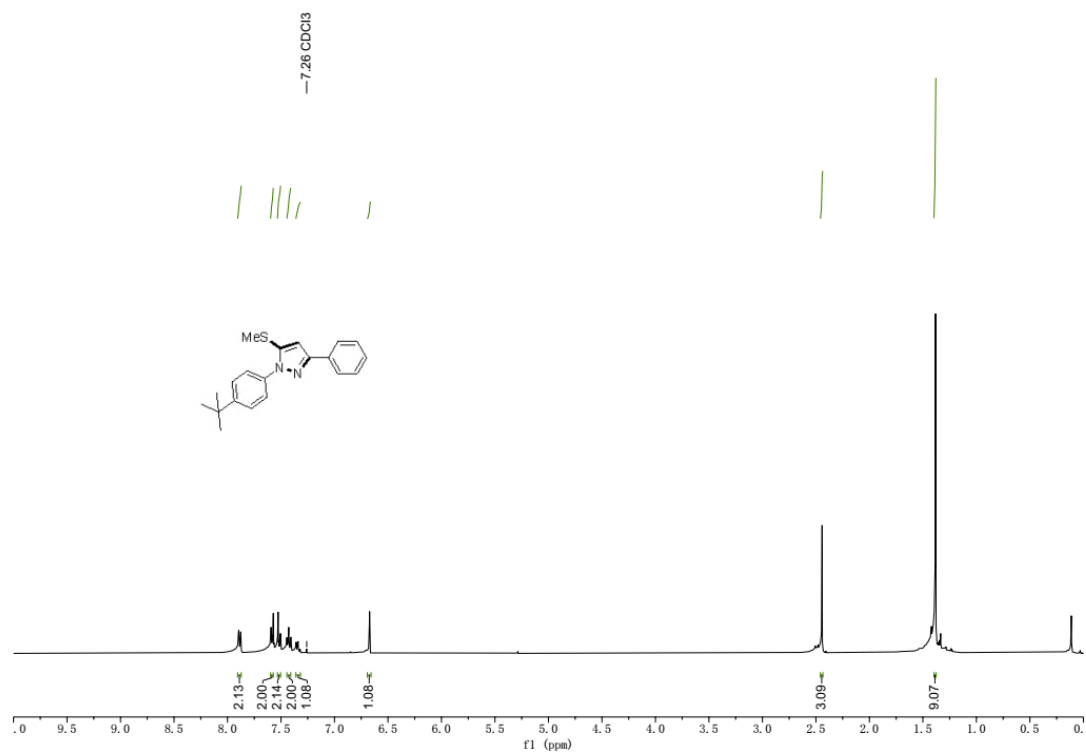

Figure S72.  $^1\text{H NMR}$  (400 MHz,  $\text{CDCl}_3$ ) spectrum of 3ai

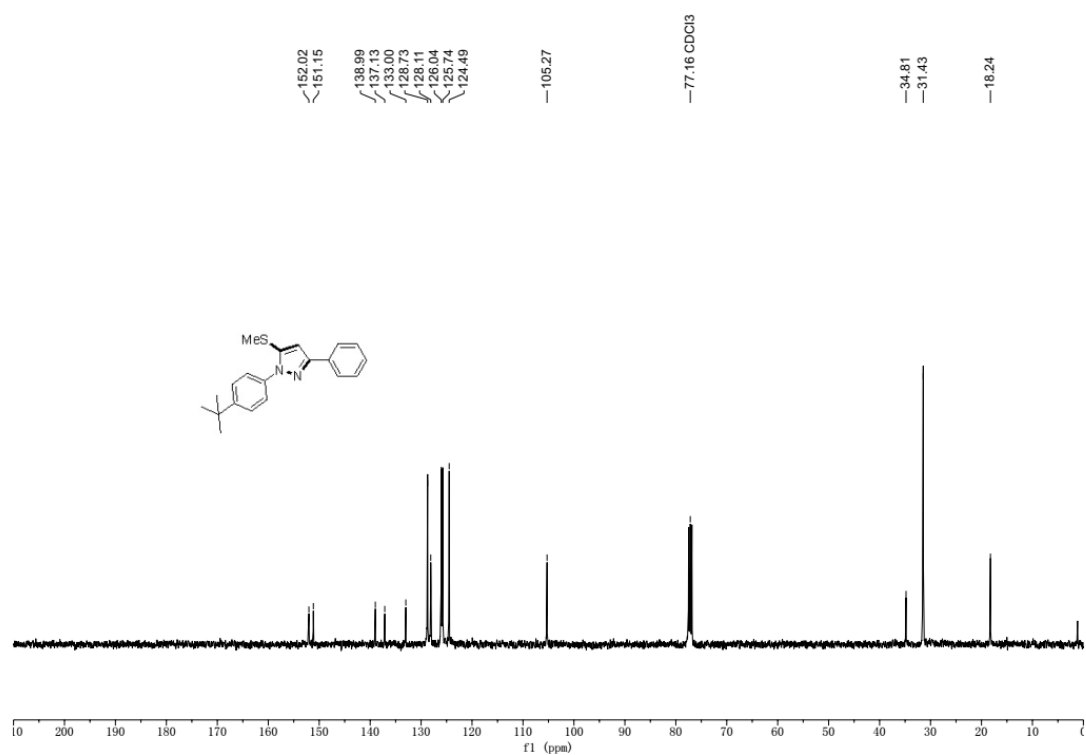

Figure S73.  $^{13}\text{C NMR}$  (100 MHz,  $\text{CDCl}_3$ ) spectrum of 3ai

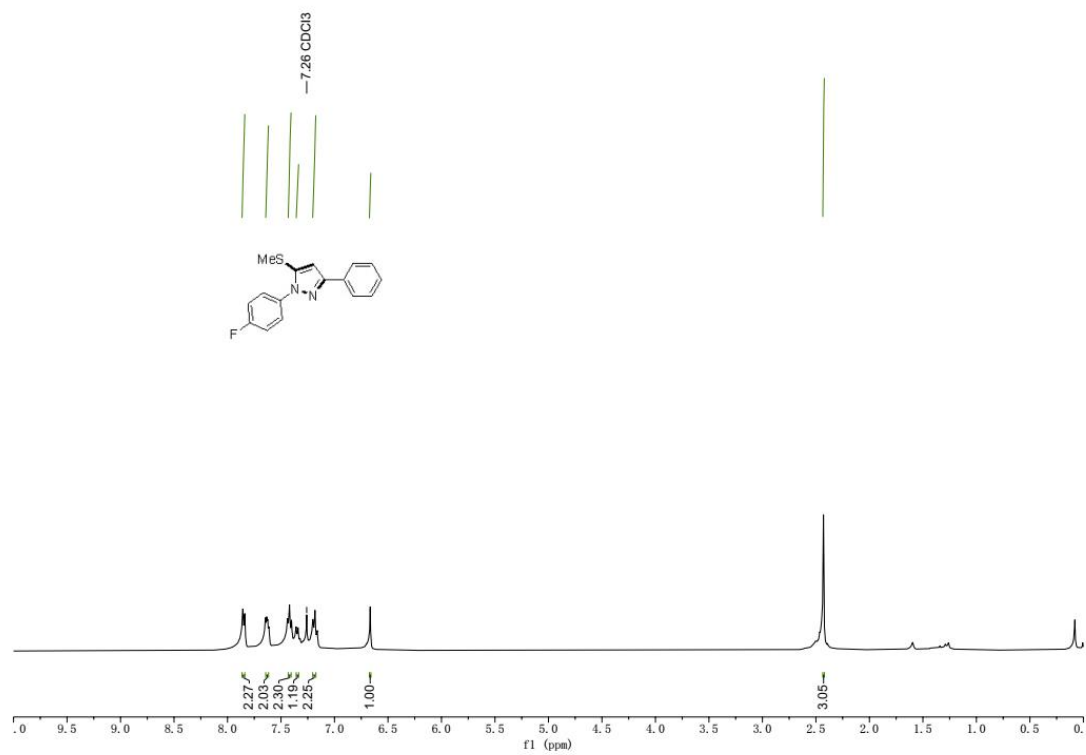

Figure S74.  $^1\text{H NMR}$  (400 MHz,  $\text{CDCl}_3$ ) spectrum of 3aj

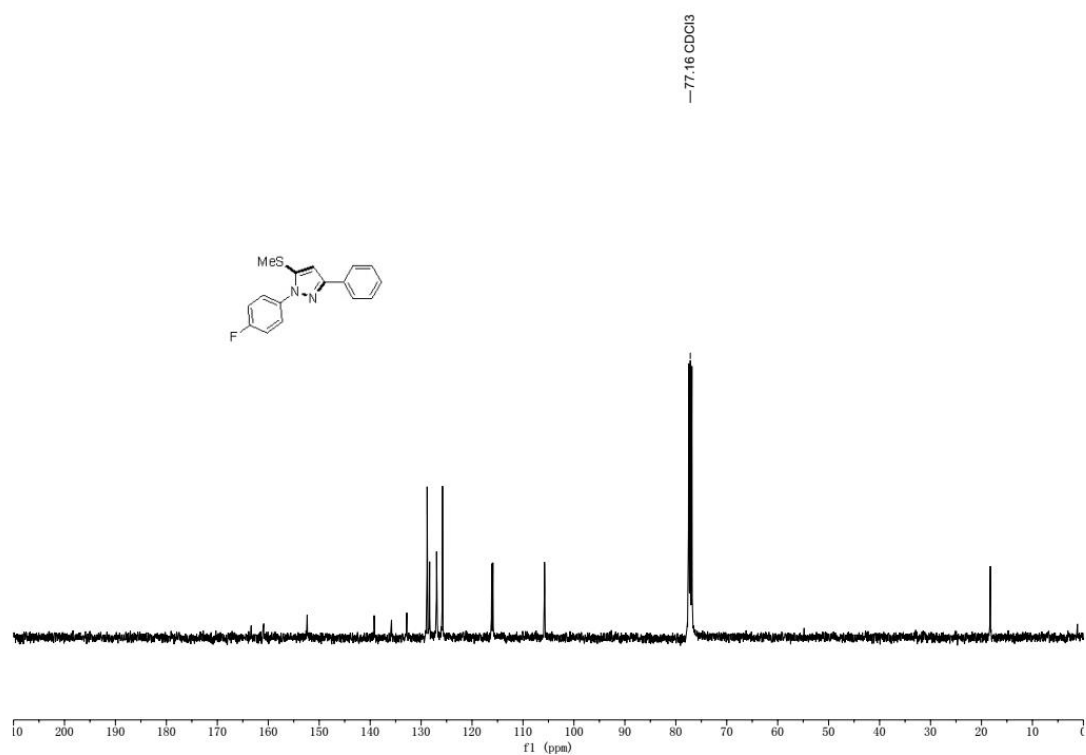

Figure S75.  $^{13}\text{C NMR}$  (100 MHz,  $\text{CDCl}_3$ ) spectrum of 3aj



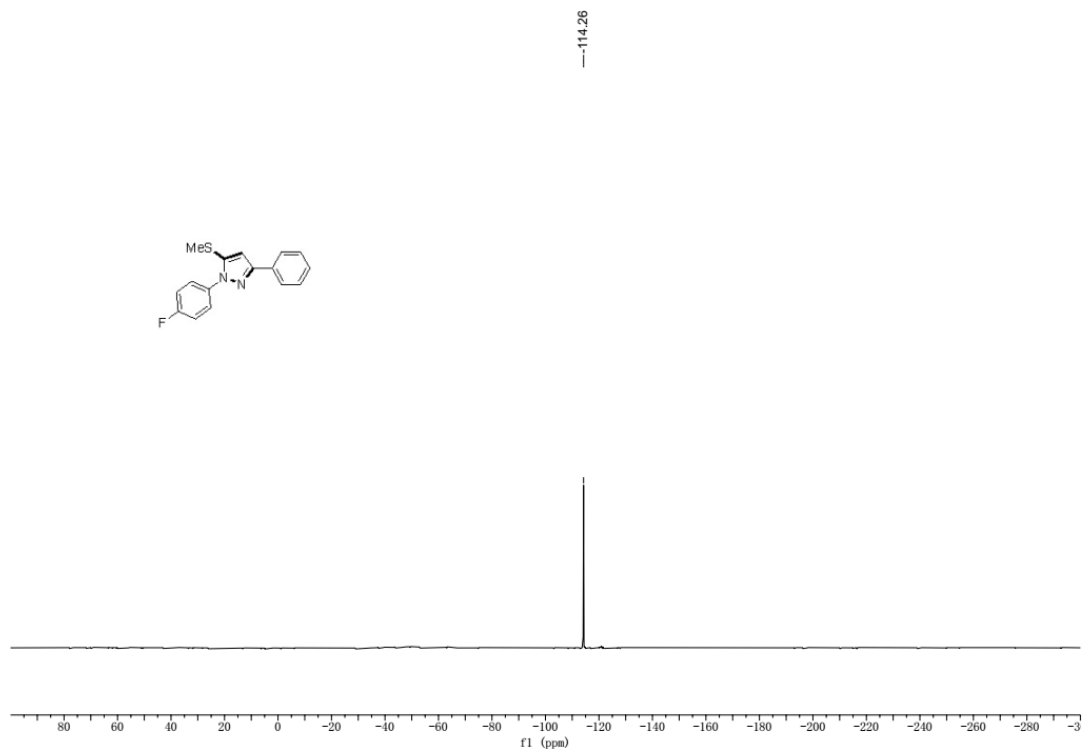

**Figure S76.**  $^{19}\text{F}$  NMR (376 MHz,  $\text{CDCl}_3$ ) spectrum of (**3aj**)

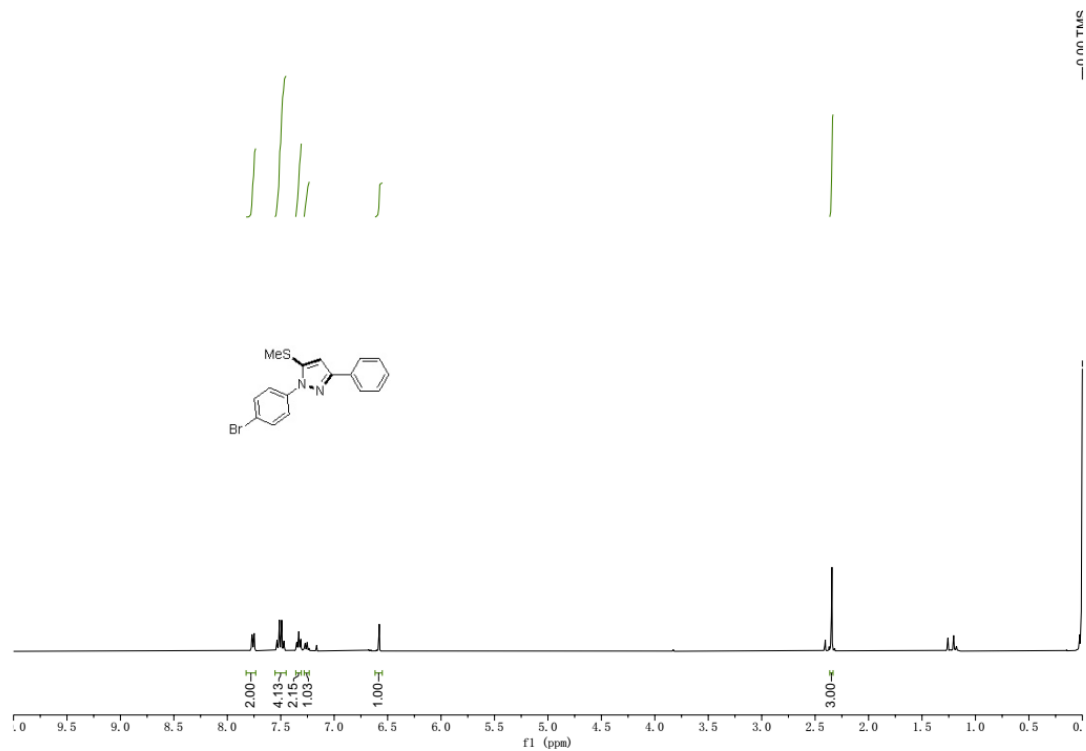

Figure S77. <sup>1</sup>H NMR (400 MHz, CDCl<sub>3</sub>) spectrum of 3ak

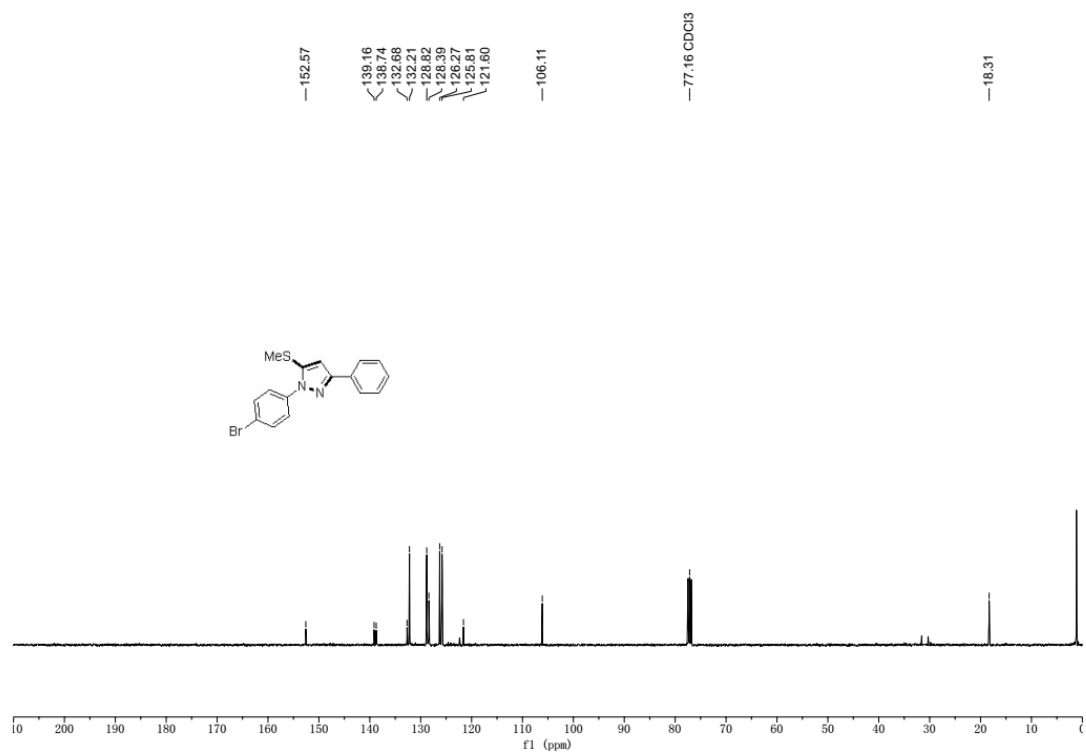

Figure S78. <sup>13</sup>C NMR (100 MHz, CDCl<sub>3</sub>) spectrum of 3ak

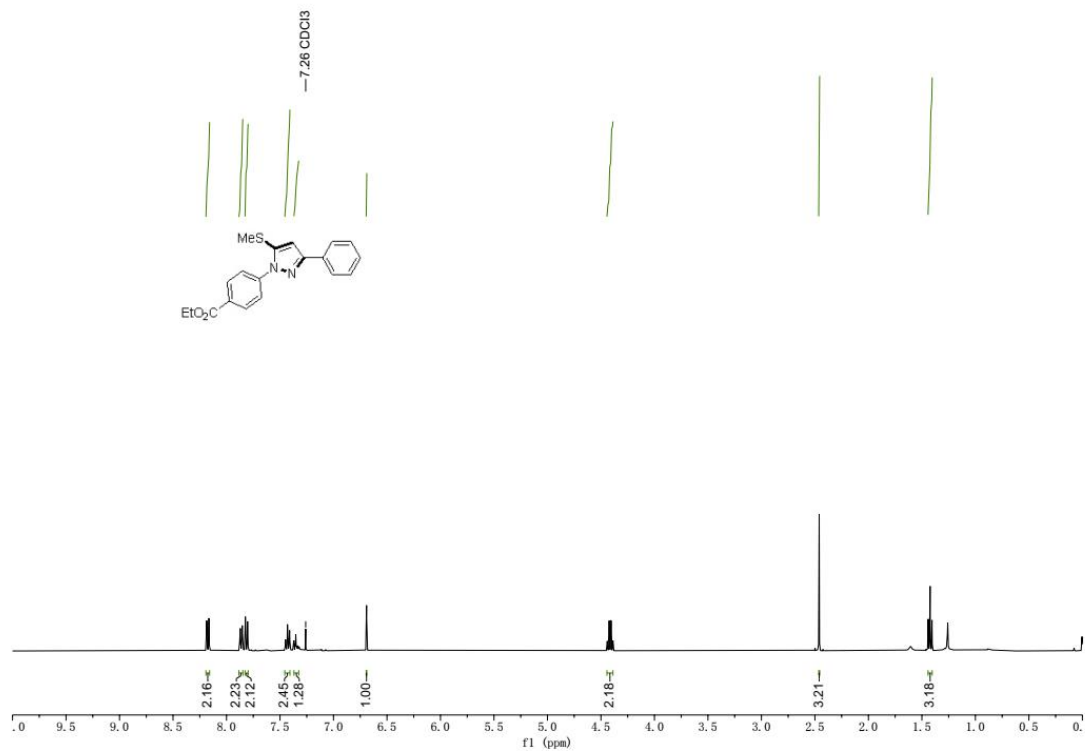

Figure S79. <sup>1</sup>H NMR (400 MHz, CDCl<sub>3</sub>) spectrum of 3al

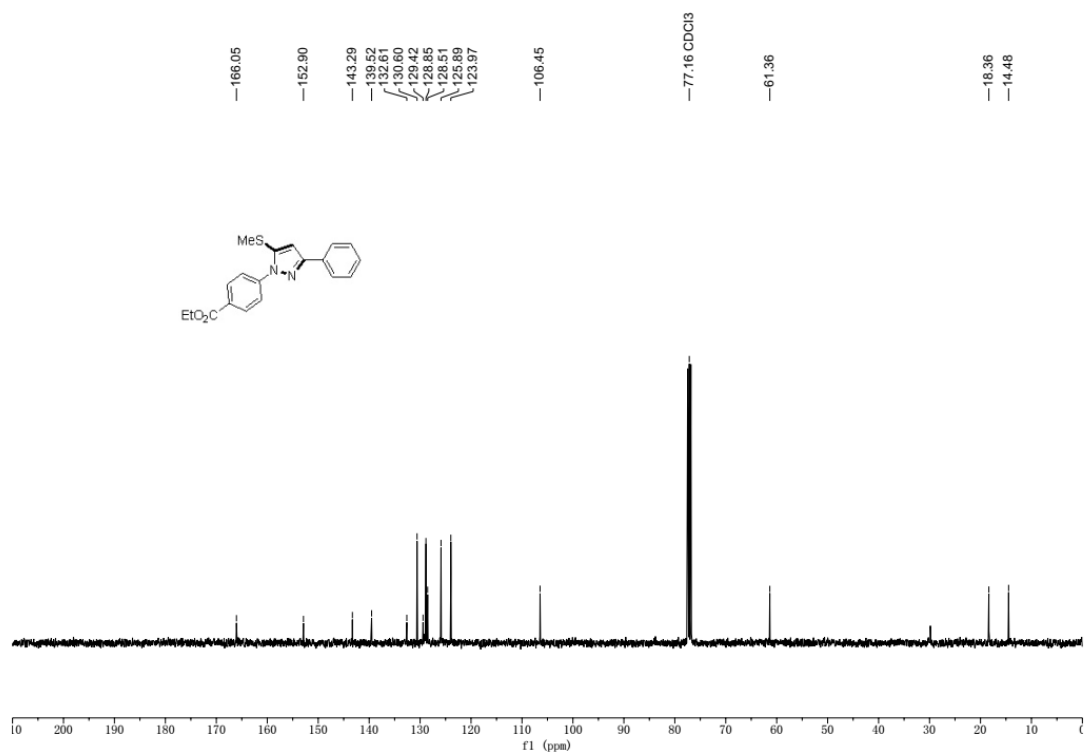

Figure S80. <sup>13</sup>C NMR (100 MHz, CDCl<sub>3</sub>) spectrum of 3al

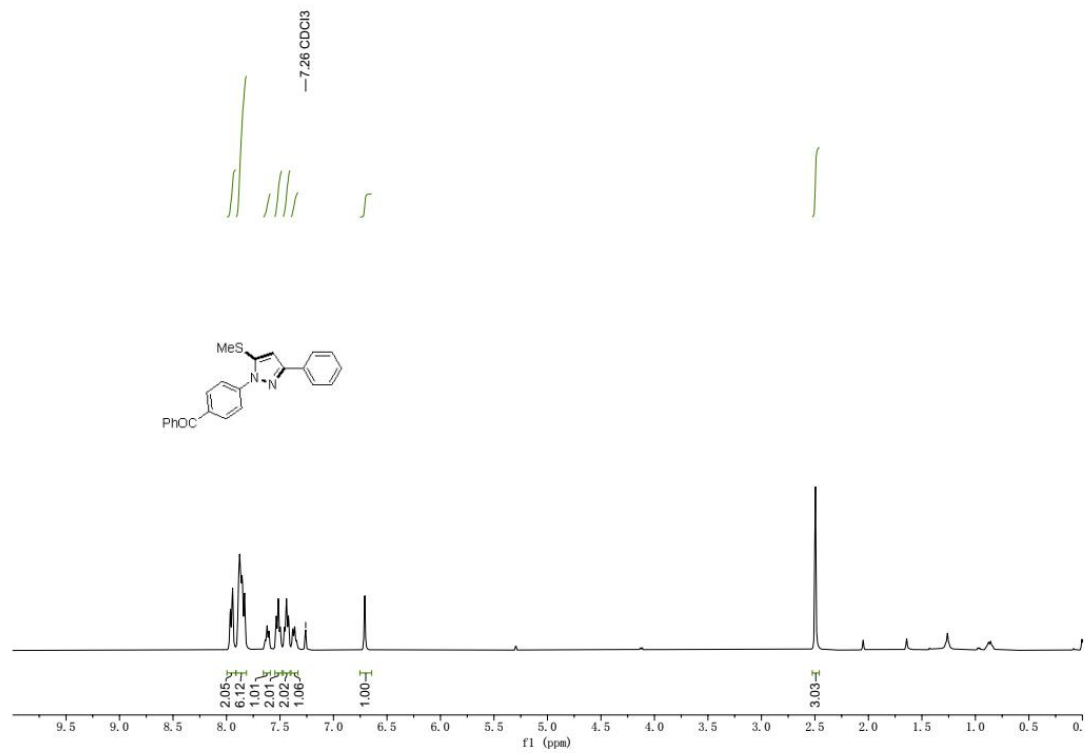

Figure S81. <sup>1</sup>H NMR (400 MHz, CDCl<sub>3</sub>) spectrum of 3am

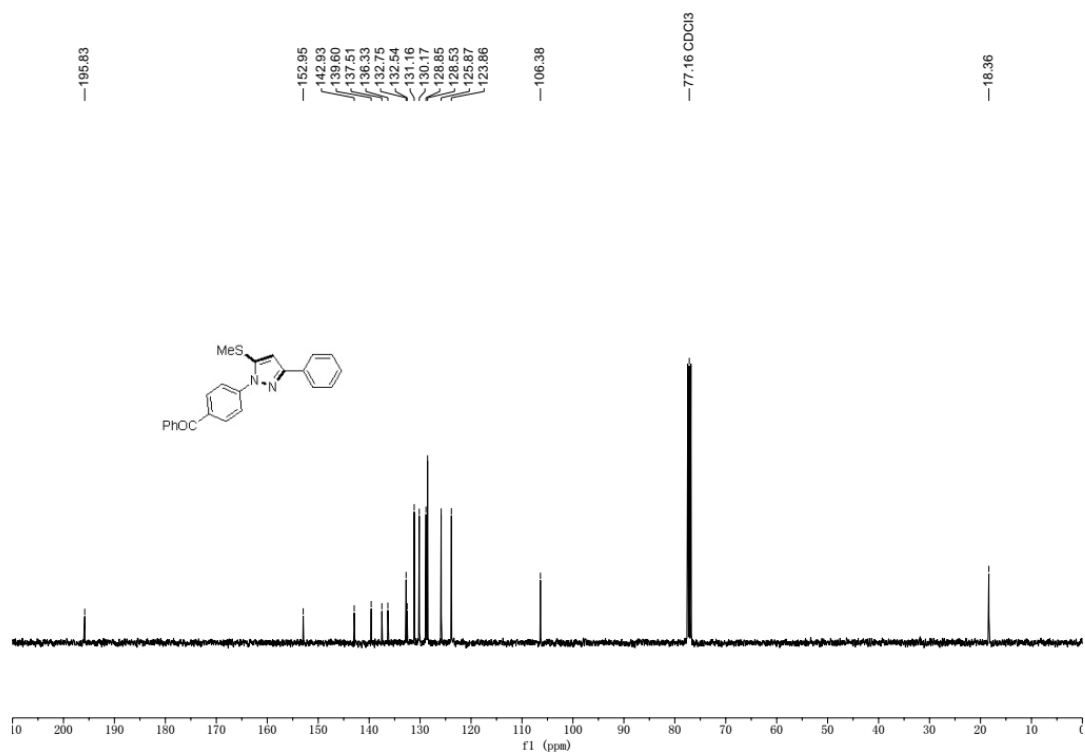

Figure S82. <sup>13</sup>C NMR (100 MHz, CDCl<sub>3</sub>) spectrum of 3am

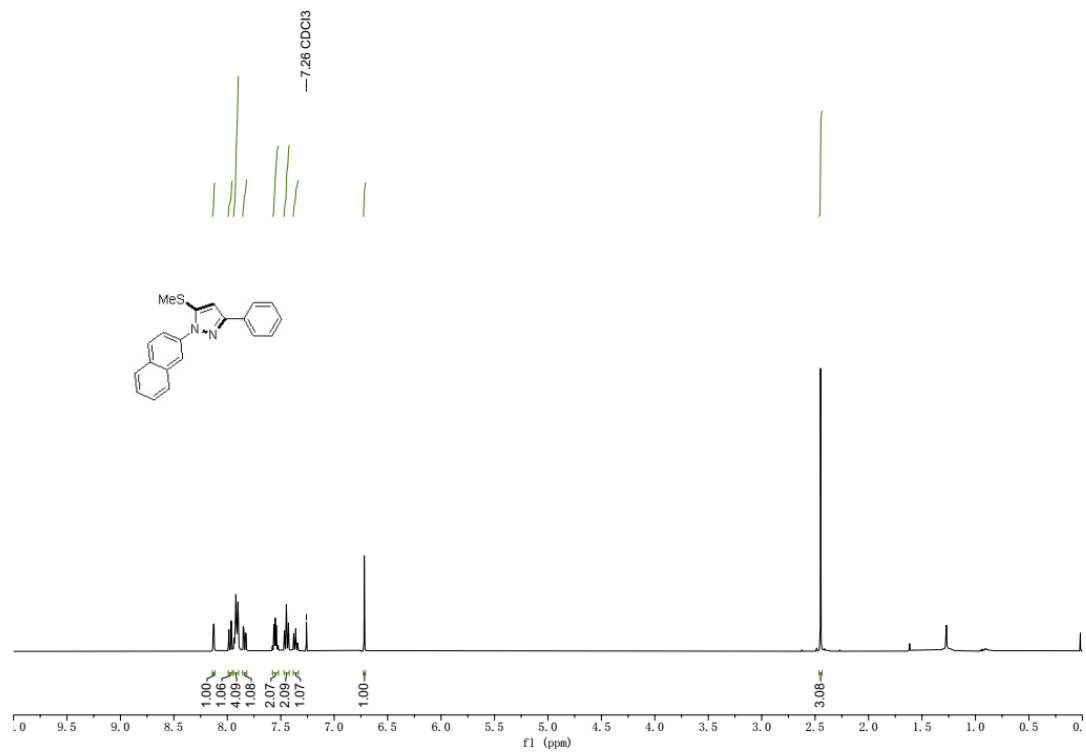

Figure S83.  $^1\text{H NMR}$  (400 MHz,  $\text{CDCl}_3$ ) spectrum of 3an

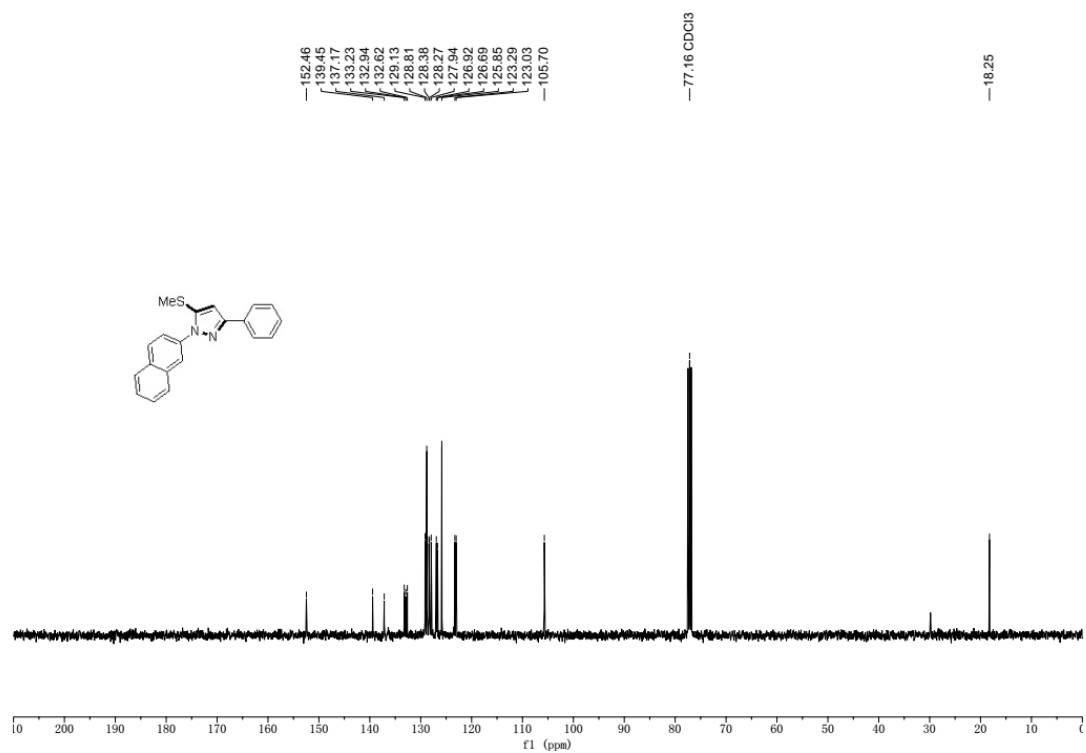

Figure S84.  $^{13}\text{C NMR}$  (100 MHz,  $\text{CDCl}_3$ ) spectrum of 3an

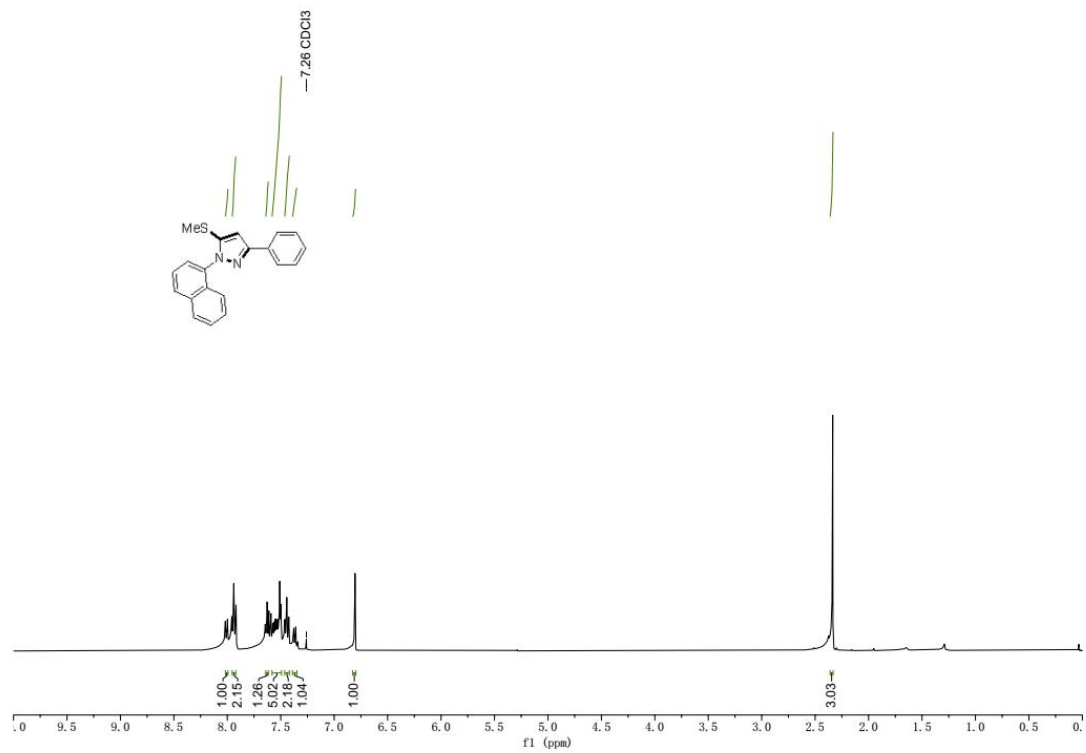

Figure S85.  $^1\text{H NMR}$  (400 MHz,  $\text{CDCl}_3$ ) spectrum of 3ao

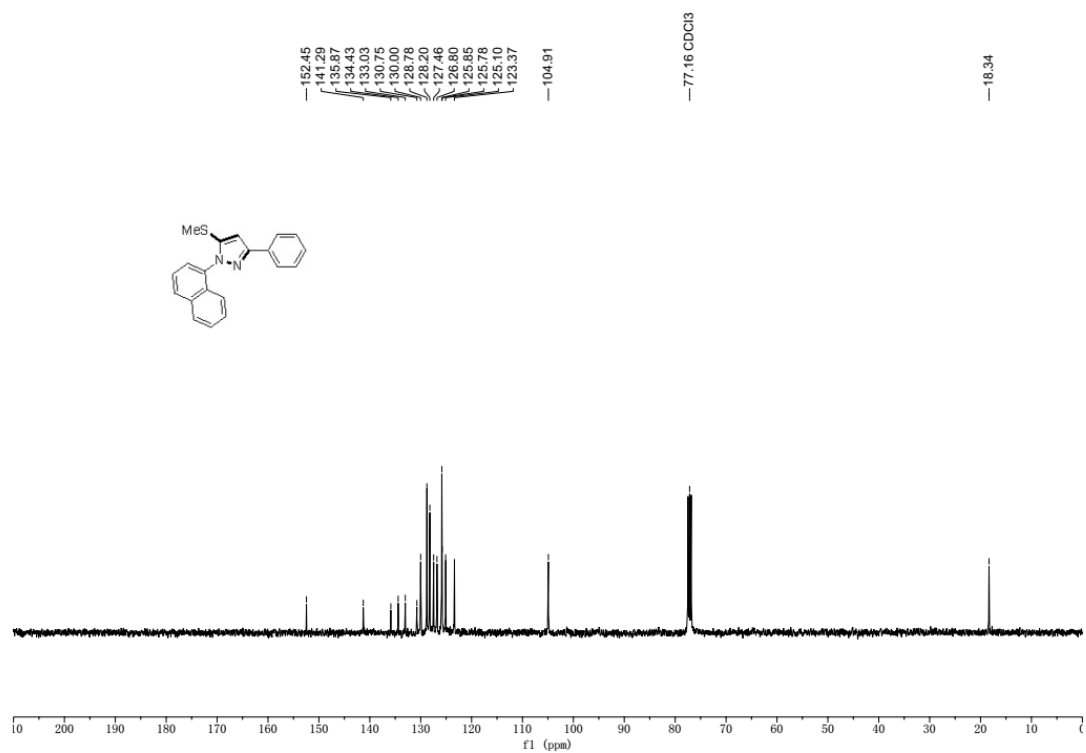

Figure S86.  $^{13}\text{C NMR}$  (100 MHz,  $\text{CDCl}_3$ ) spectrum of 3ao

-7.260 CDCl<sub>3</sub>

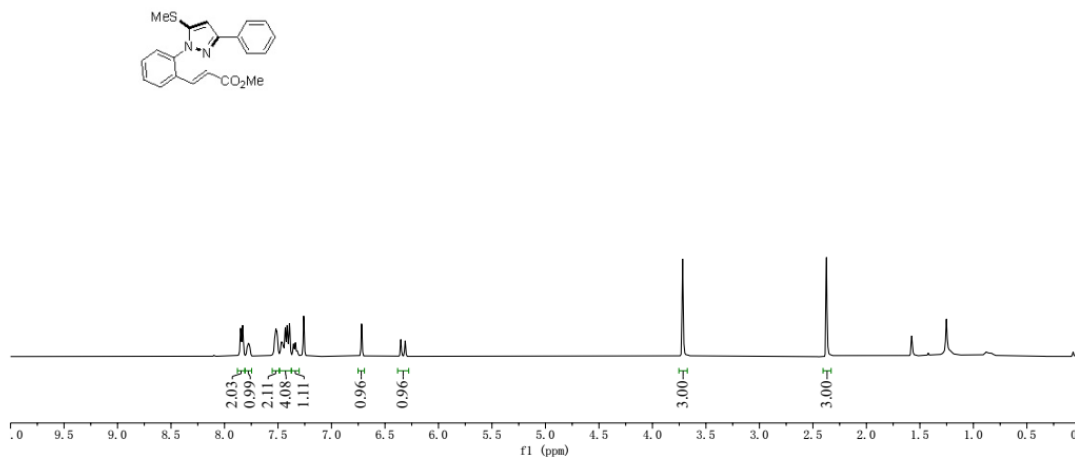

Figure S87. <sup>1</sup>H NMR (400 MHz, CDCl<sub>3</sub>) spectrum of 3ap

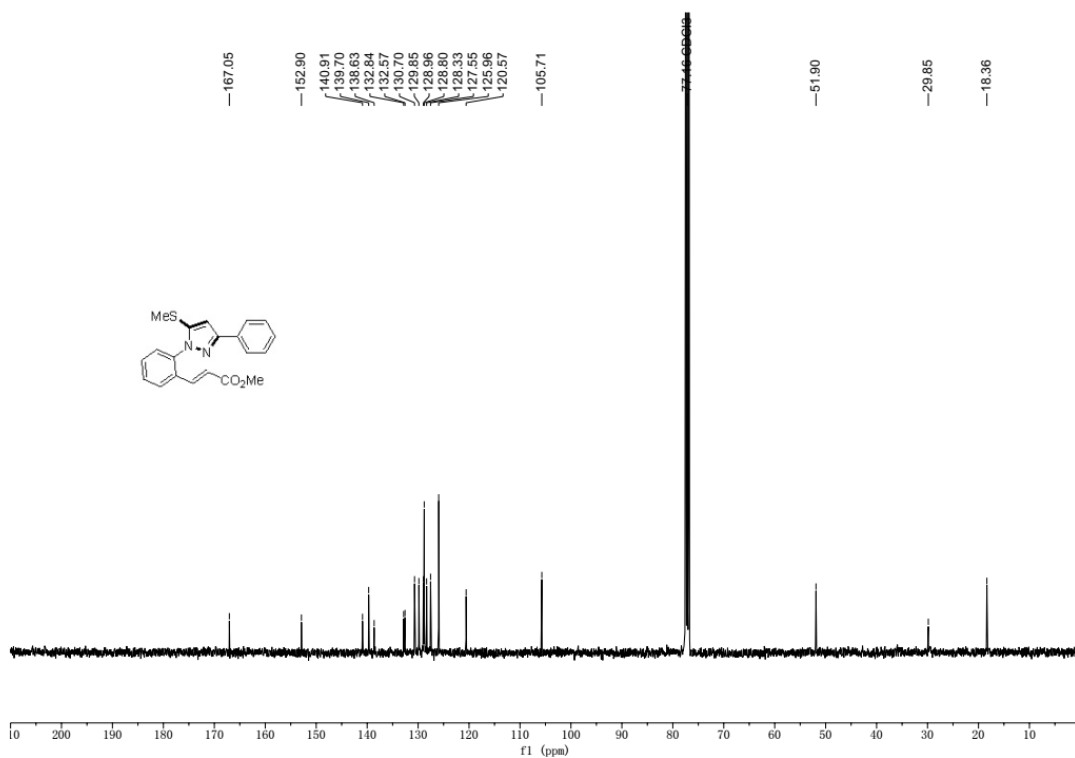

Figure S88. <sup>13</sup>C NMR (100 MHz, CDCl<sub>3</sub>) spectrum of 3ap

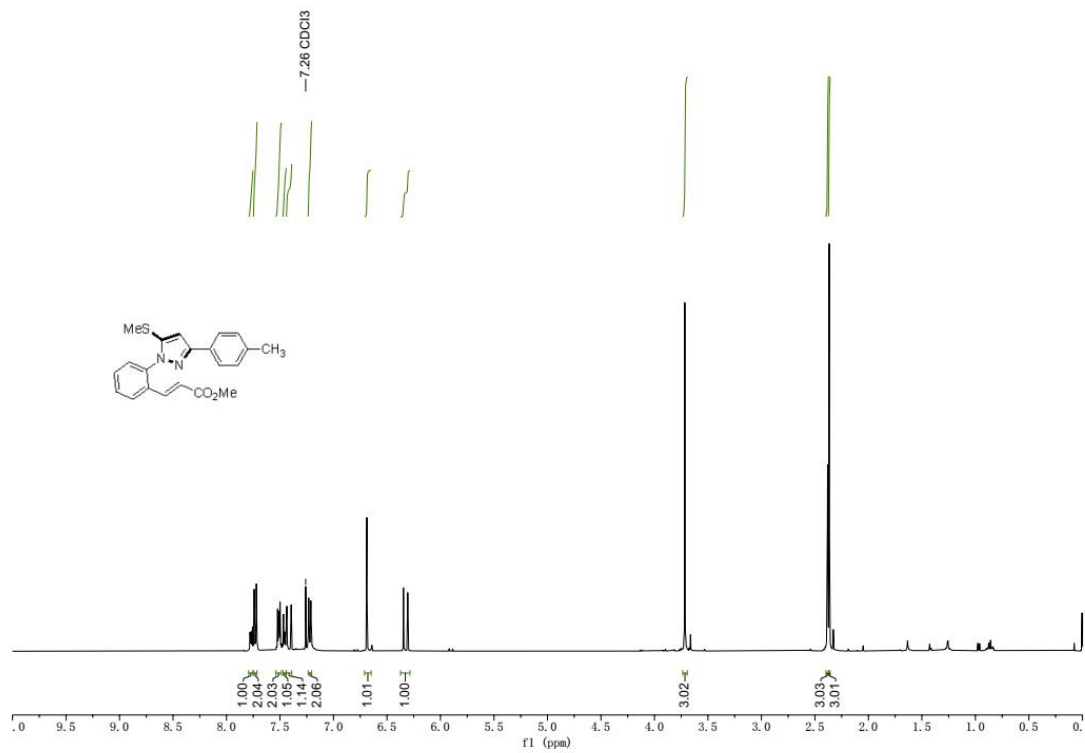

Figure S89. <sup>1</sup>H NMR (400 MHz, CDCl<sub>3</sub>) spectrum of 3bp

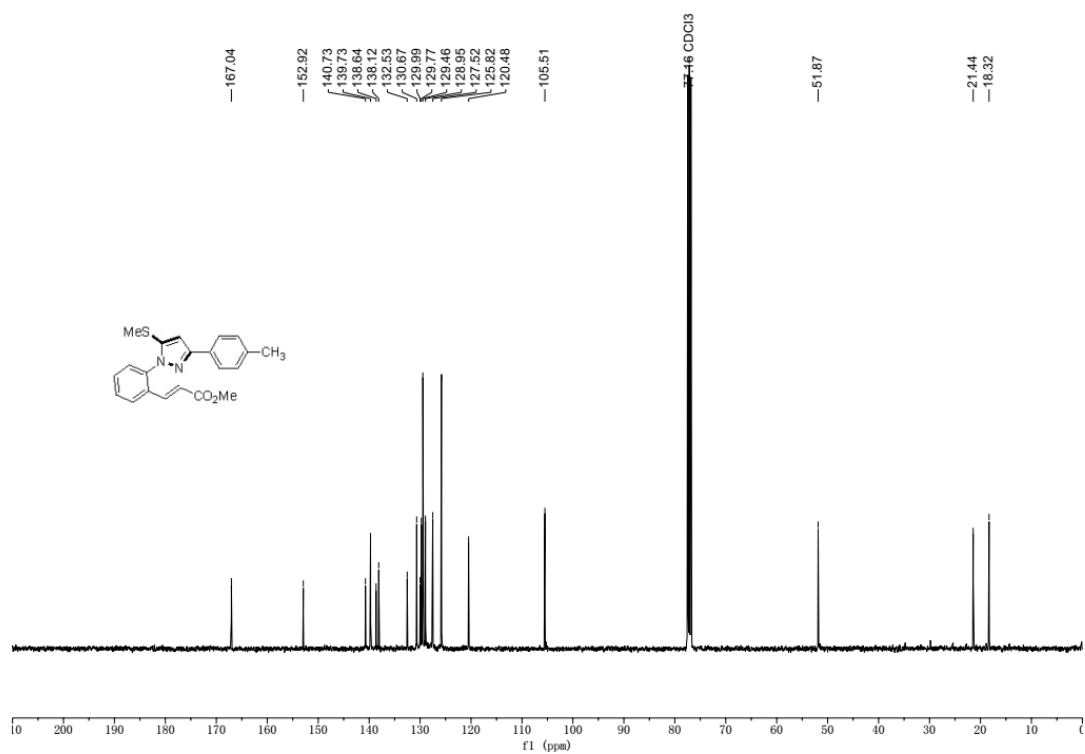

Figure S90. <sup>13</sup>C NMR (100 MHz, CDCl<sub>3</sub>) spectrum of 3bp



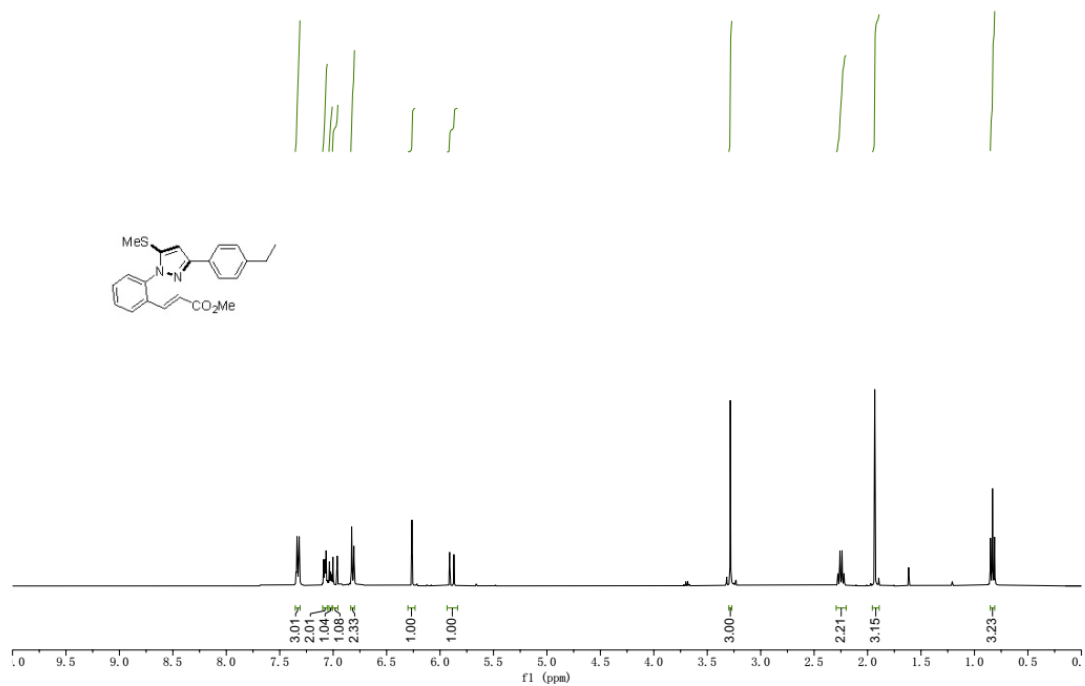

Figure S91.  $^1\text{H NMR}$  (400 MHz,  $\text{CDCl}_3$ ) spectrum of 3ep

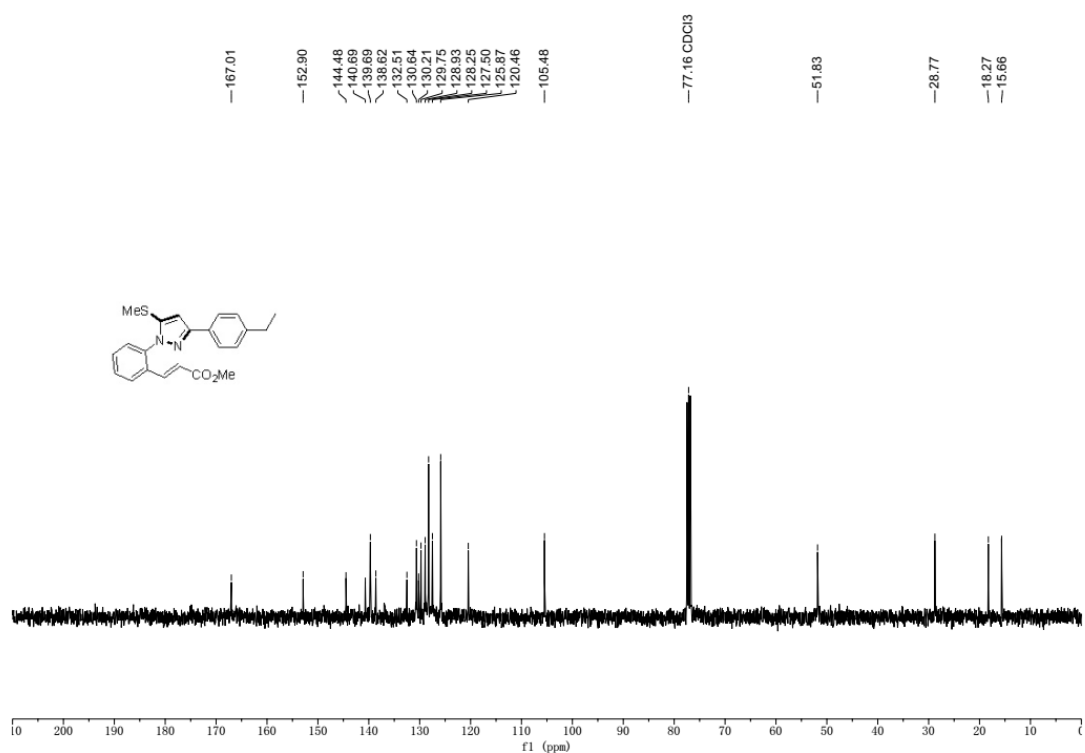

Figure S92.  $^{13}\text{C NMR}$  (100 MHz,  $\text{CDCl}_3$ ) spectrum of 3ep

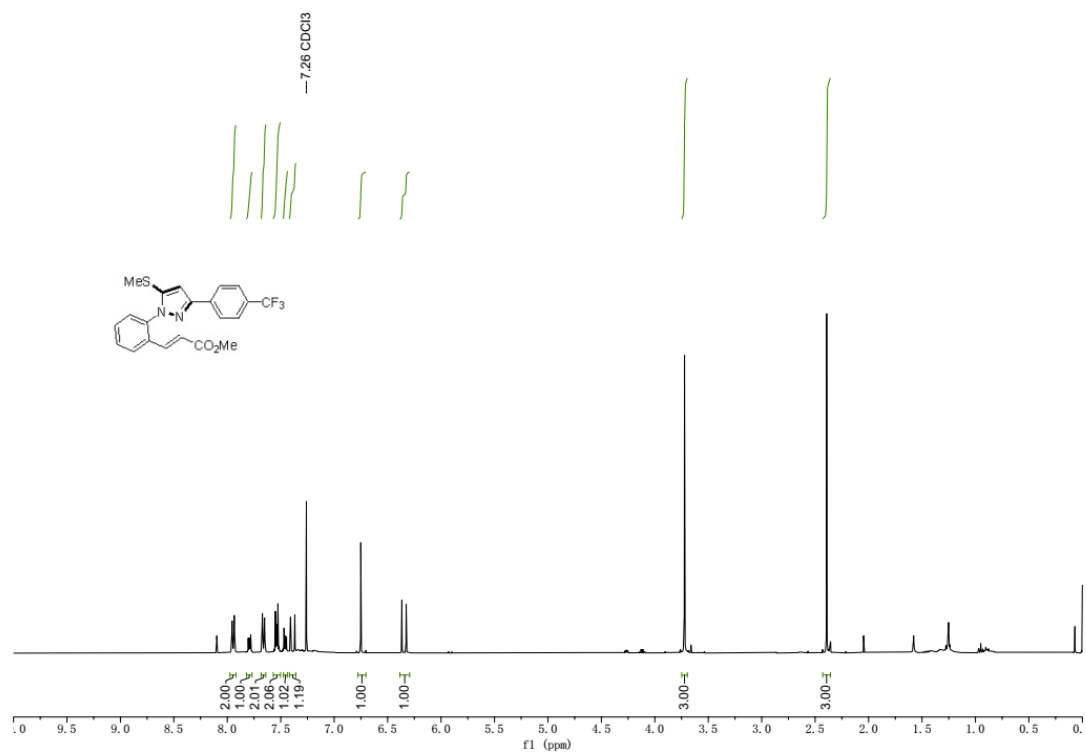

Figure S93. <sup>1</sup>H NMR (400 MHz, CDCl<sub>3</sub>) spectrum of 3jp

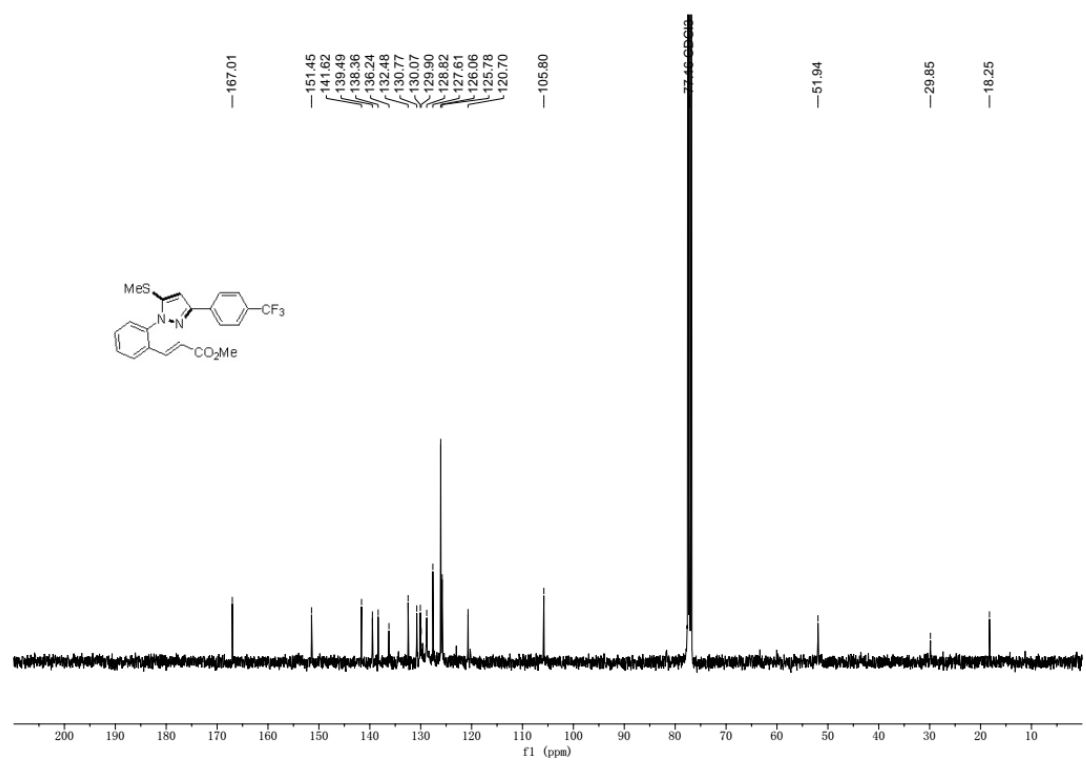

Figure S94. <sup>13</sup>C NMR (100 MHz, CDCl<sub>3</sub>) spectrum of 3jp

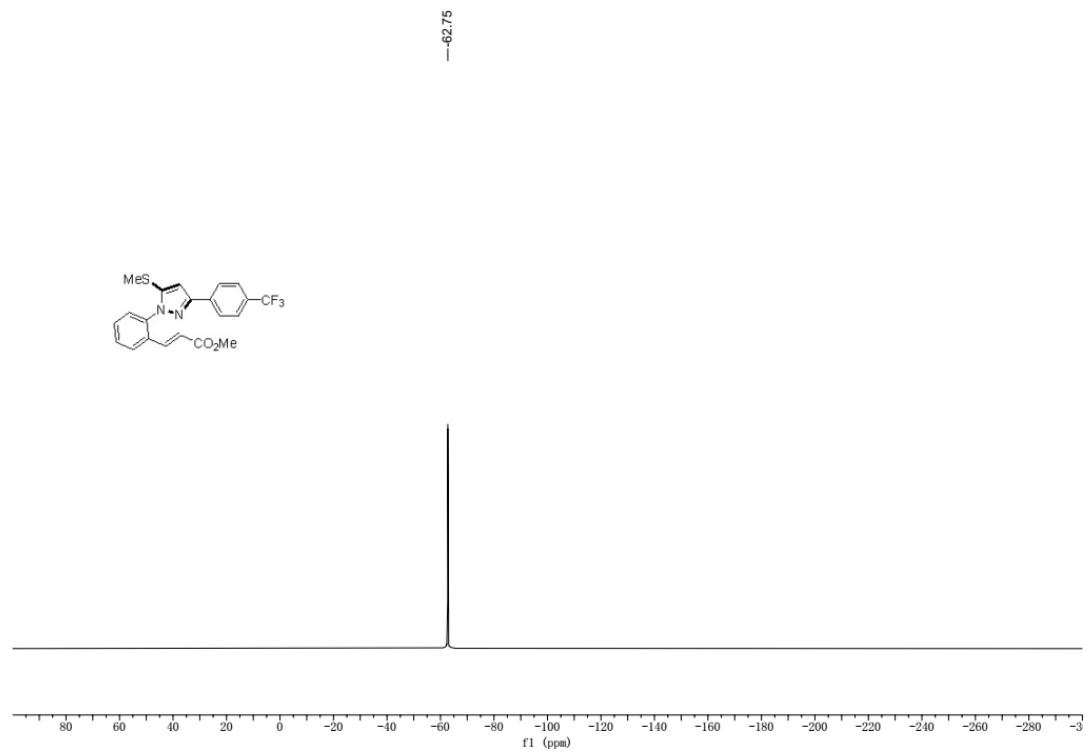

**Figure S95.**  $^{19}\text{F}$  NMR (376 MHz,  $\text{CDCl}_3$ ) spectrum of (3jp)

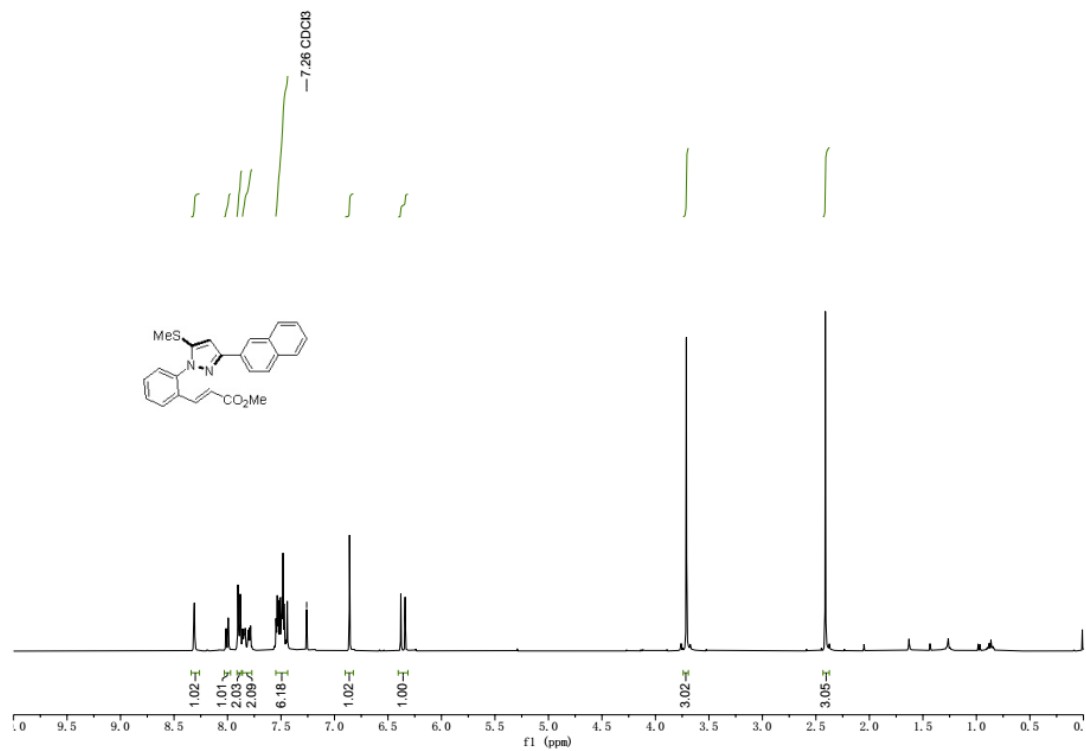

Figure S96. <sup>1</sup>H NMR (400 MHz, CDCl<sub>3</sub>) spectrum of 3lp

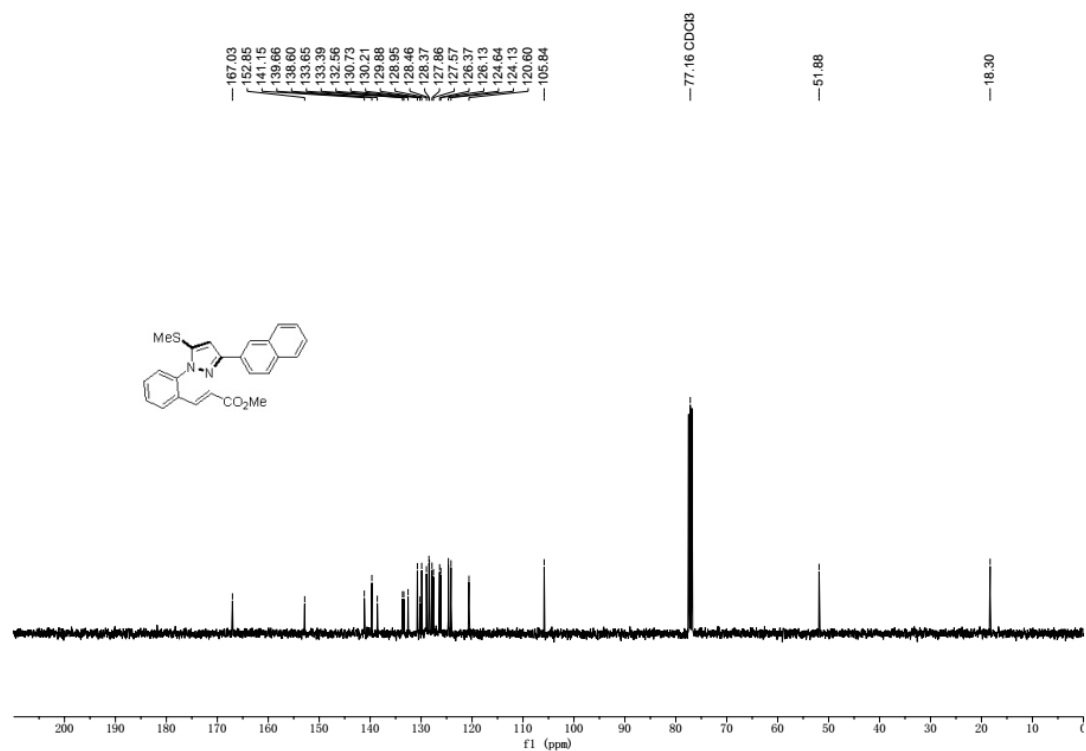

Figure S97. <sup>13</sup>C NMR (100 MHz, CDCl<sub>3</sub>) spectrum of 3lp

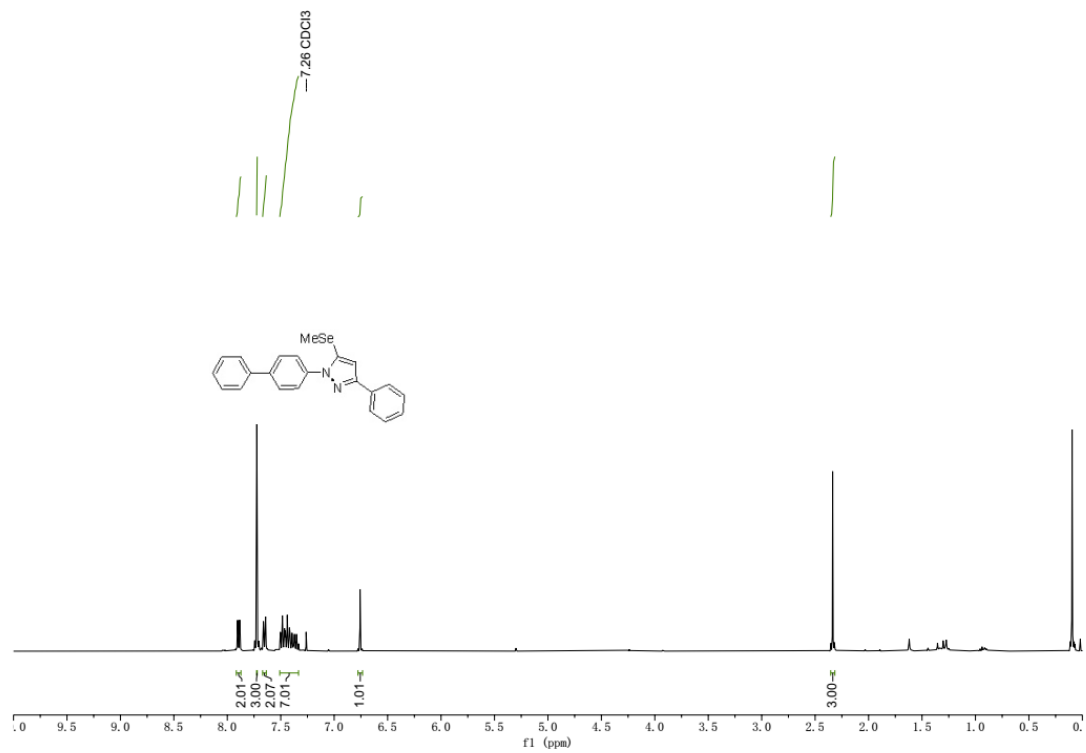

Figure S98. <sup>1</sup>H NMR (400 MHz, CDCl<sub>3</sub>) spectrum of 5a

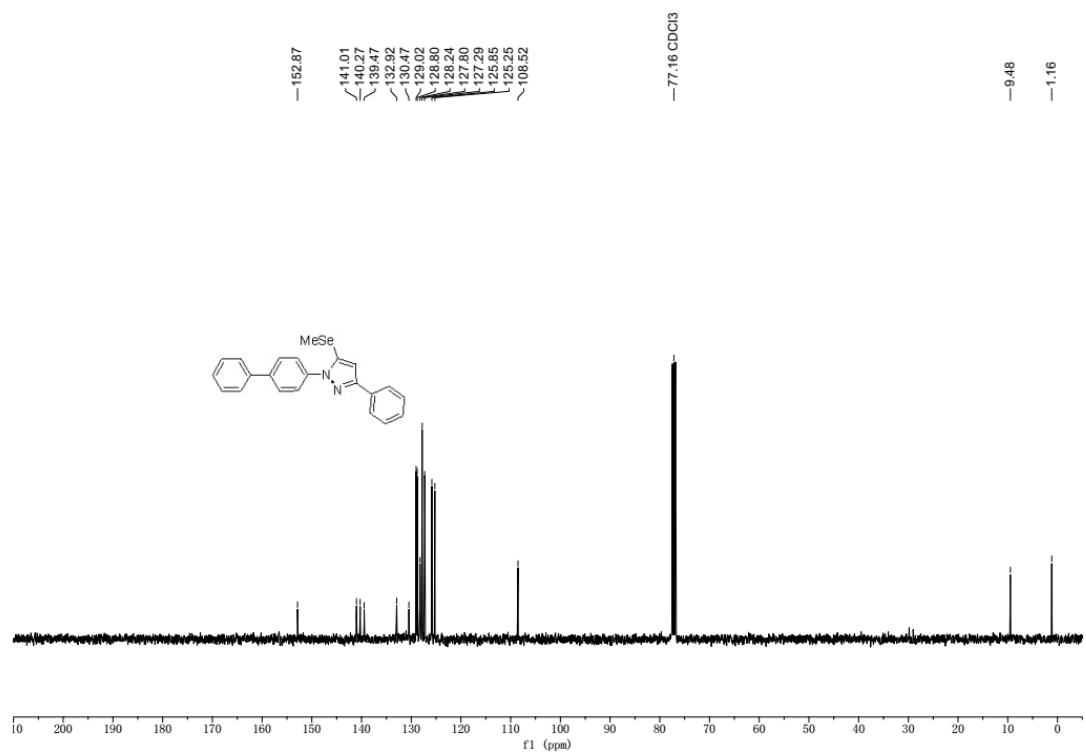

Figure S99. <sup>13</sup>C NMR (100 MHz, CDCl<sub>3</sub>) spectrum of 5a

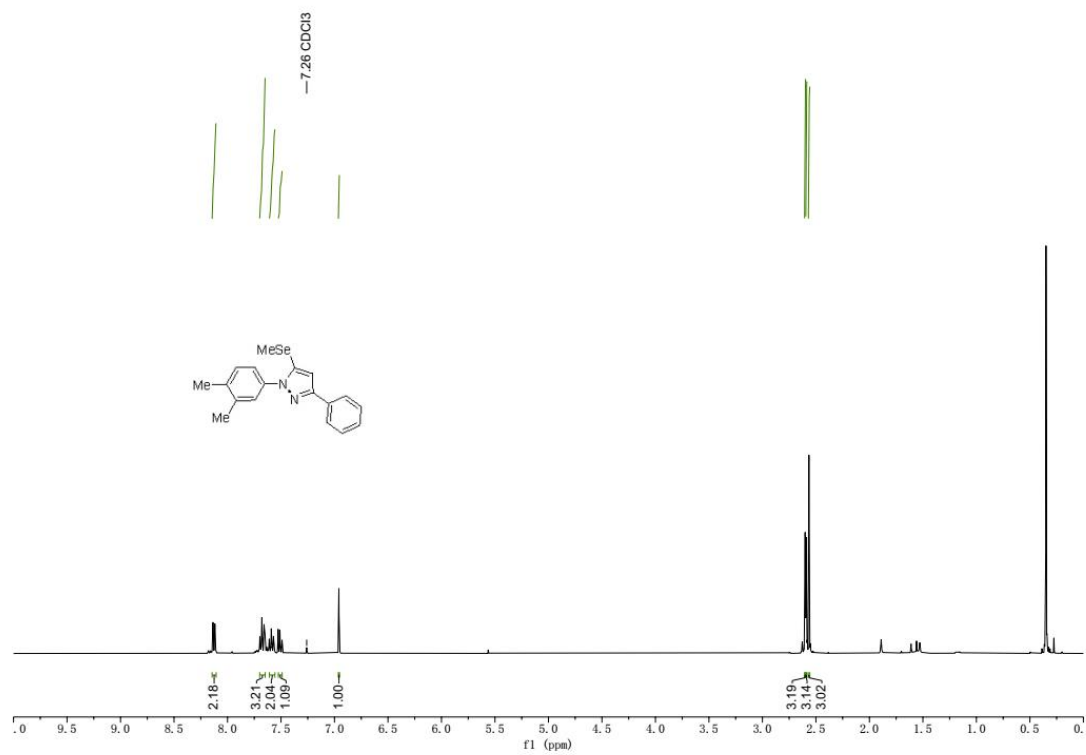

Figure S100. <sup>1</sup>H NMR (400 MHz, CDCl<sub>3</sub>) spectrum of 5b

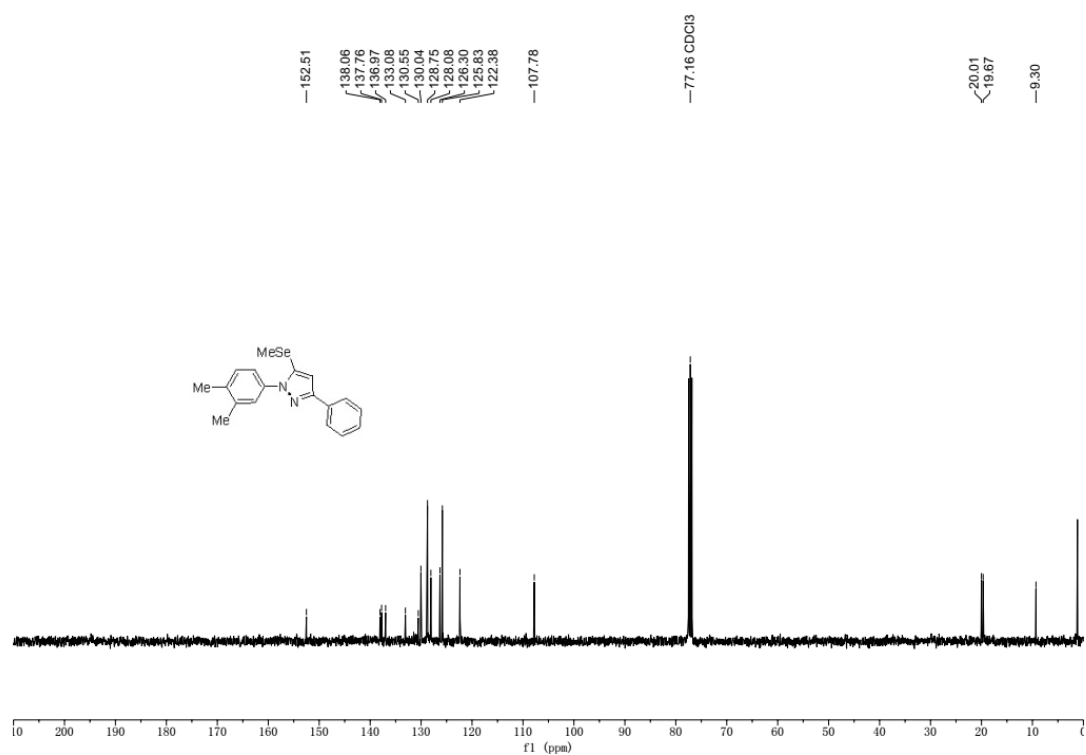

Figure S101. <sup>13</sup>C NMR (100 MHz, CDCl<sub>3</sub>) spectrum of 5b

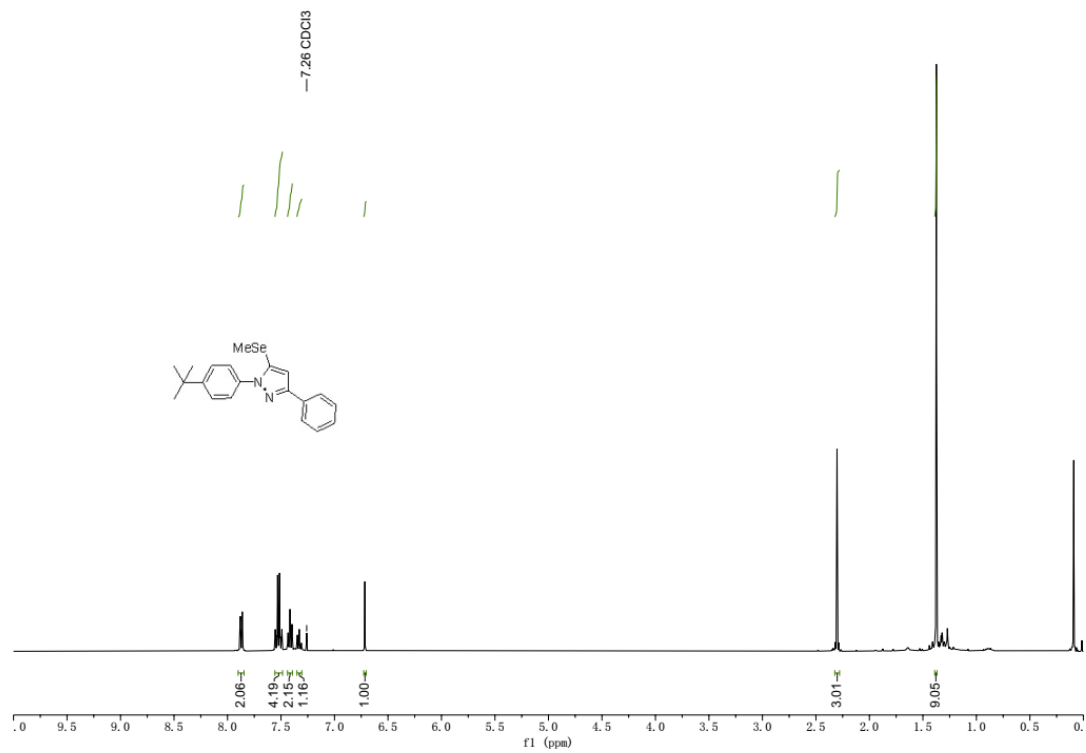

Figure S102. <sup>1</sup>H NMR (400 MHz, CDCl<sub>3</sub>) spectrum of 5c

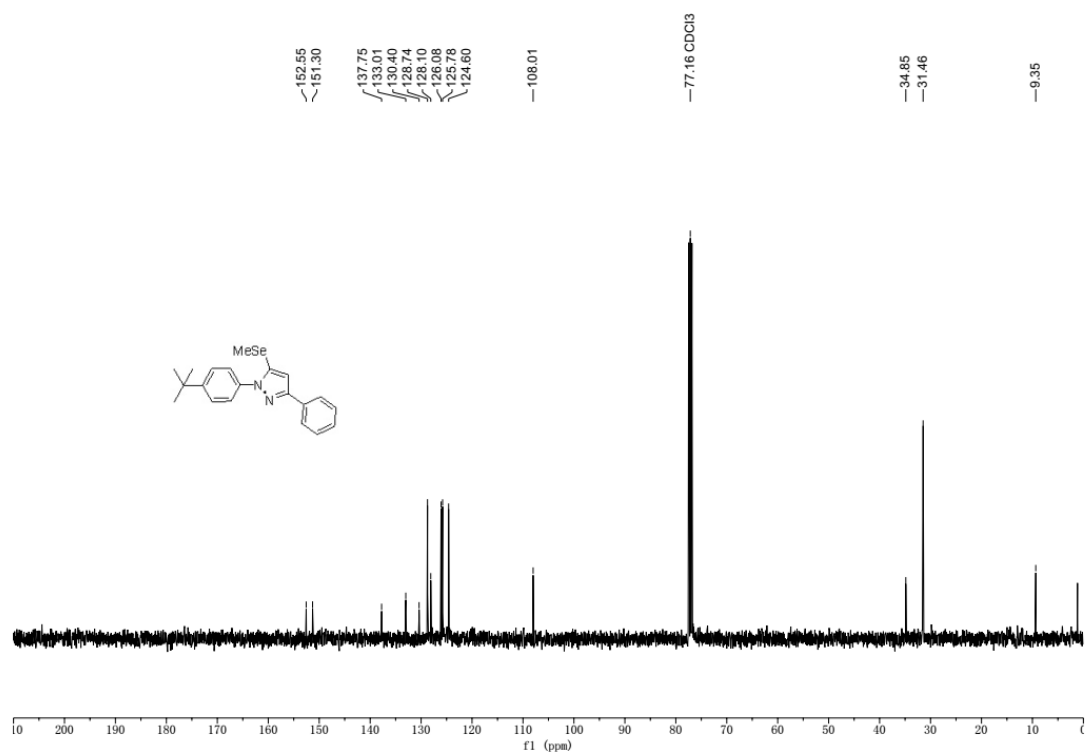

Figure S103. <sup>13</sup>C NMR (100 MHz, CDCl<sub>3</sub>) spectrum of 5c

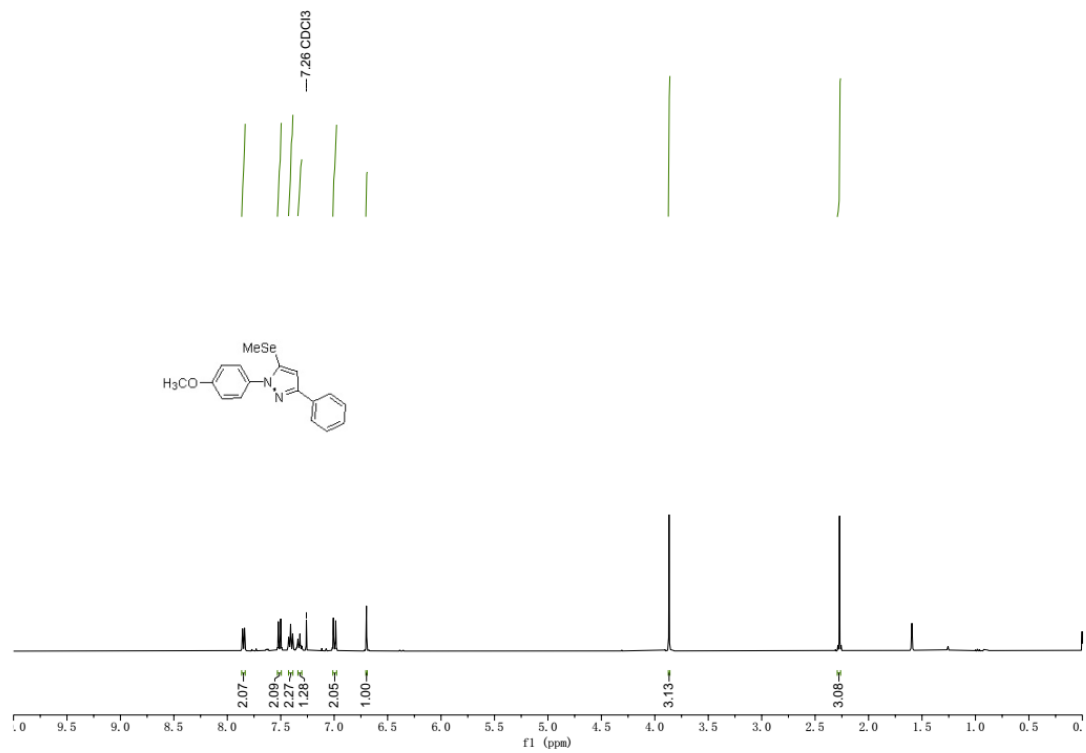

Figure S104. <sup>1</sup>H NMR (400 MHz, CDCl<sub>3</sub>) spectrum of 5d

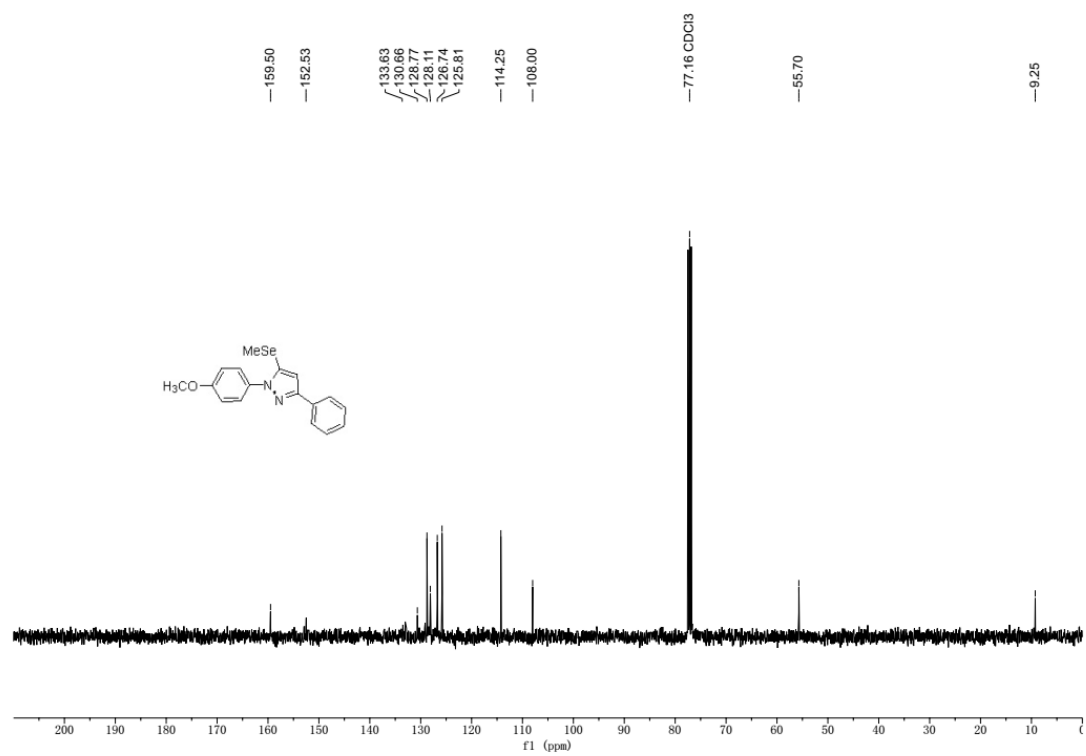

Figure S105. <sup>13</sup>C NMR (100 MHz, CDCl<sub>3</sub>) spectrum of 5d



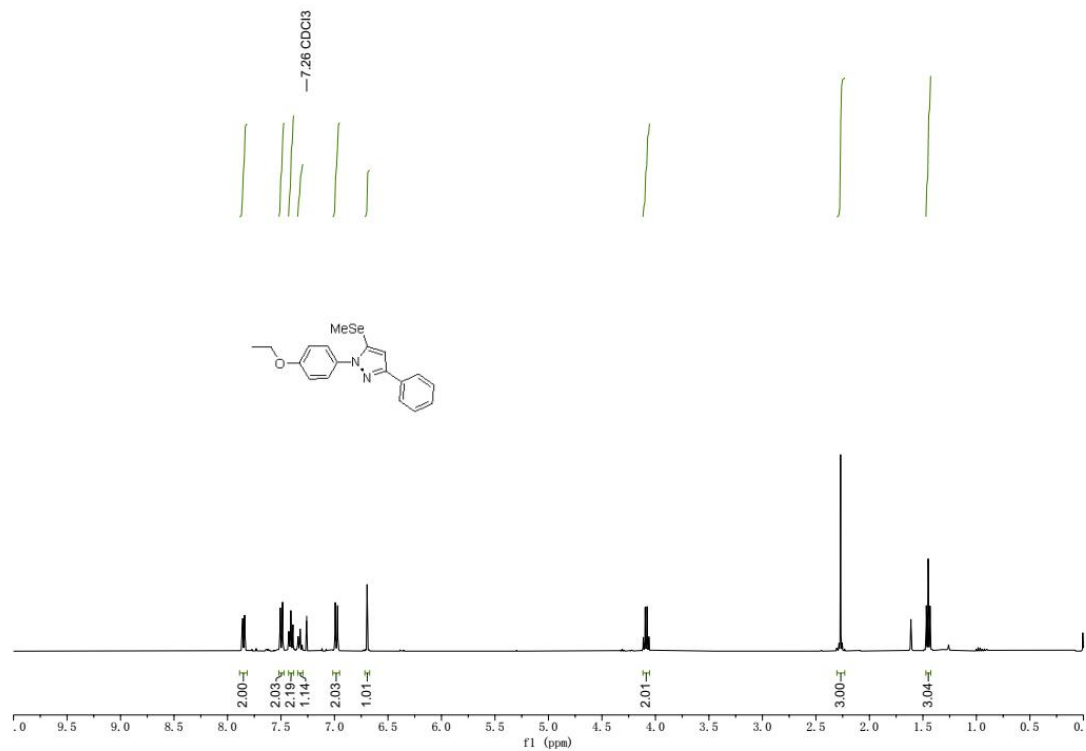

Figure S106.  $^1\text{H NMR}$  (400 MHz,  $\text{CDCl}_3$ ) spectrum of 5e

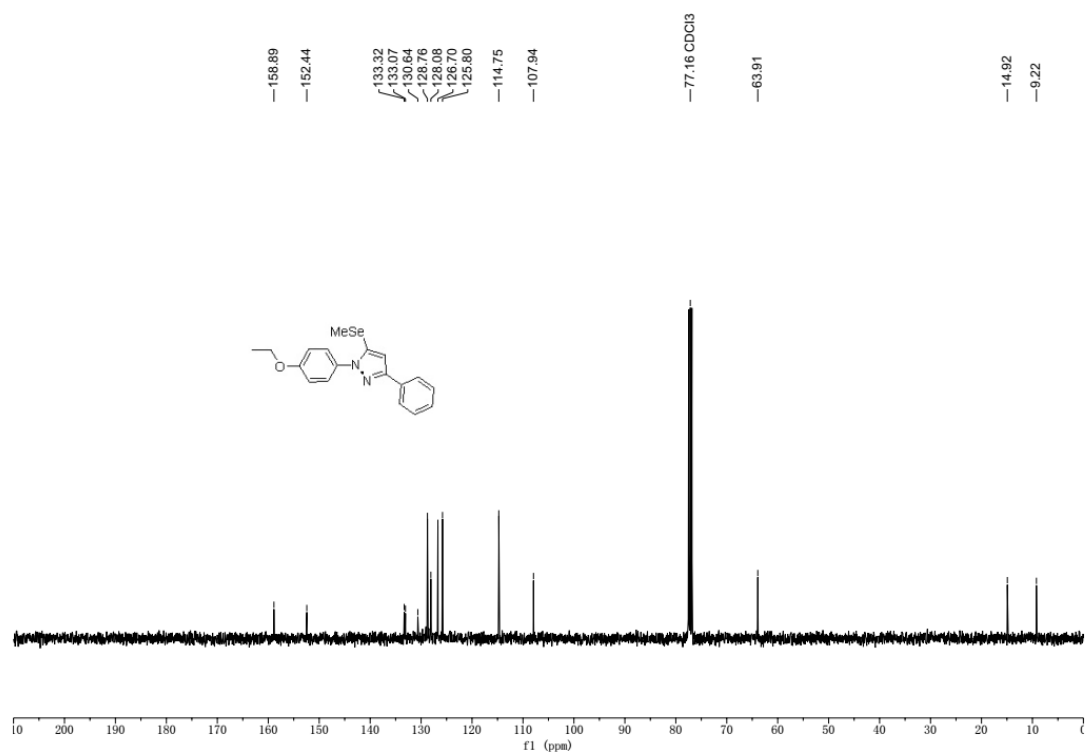

Figure S107.  $^{13}\text{C NMR}$  (100 MHz,  $\text{CDCl}_3$ ) spectrum of 5e

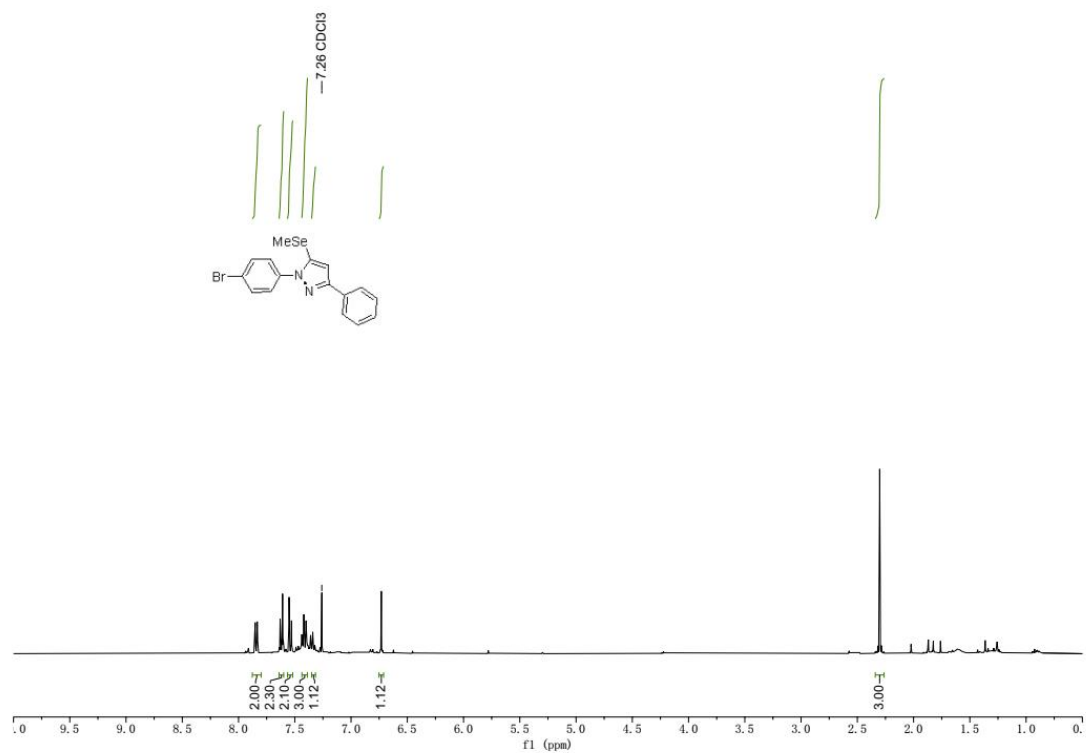

Figure S108.  $^1\text{H NMR}$  (400 MHz,  $\text{CDCl}_3$ ) spectrum of 5f

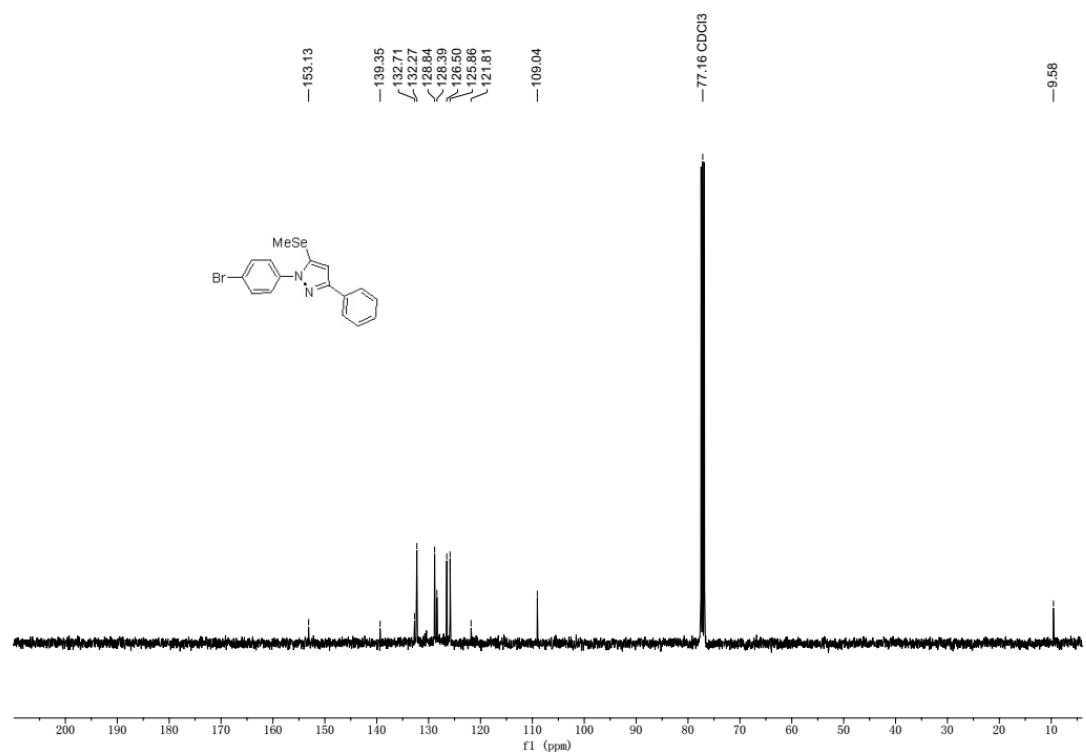

Figure S109.  $^{13}\text{C NMR}$  (100 MHz,  $\text{CDCl}_3$ ) spectrum of 5f

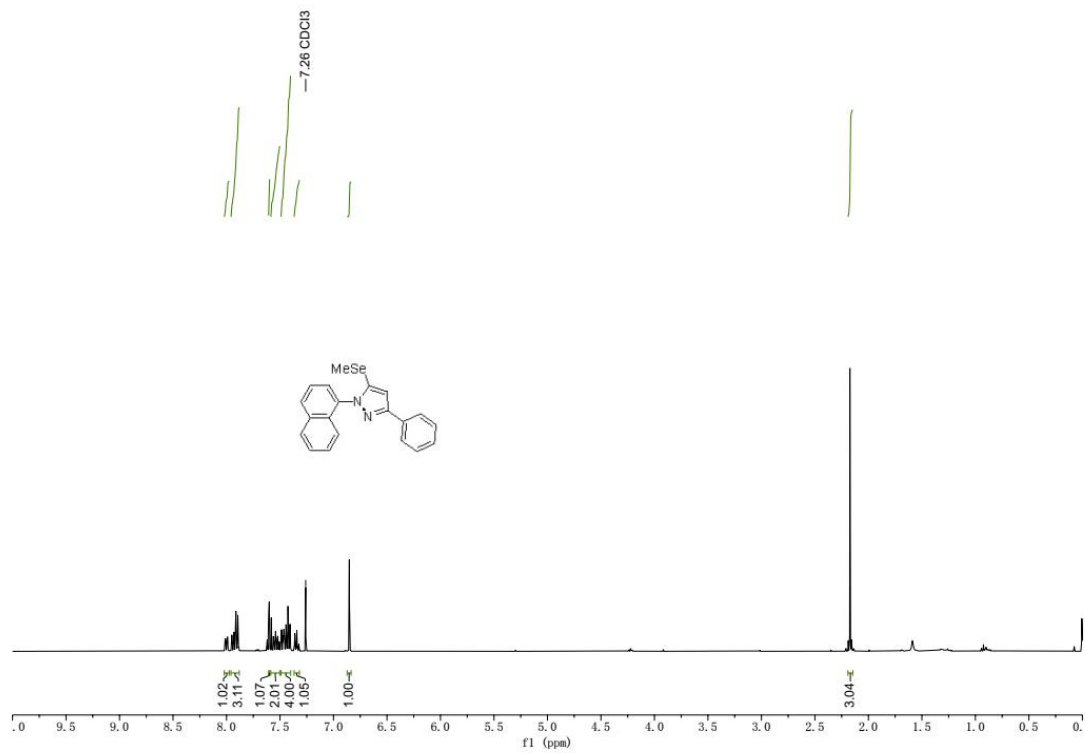

Figure S110.  $^1\text{H NMR}$  (400 MHz,  $\text{CDCl}_3$ ) spectrum of 5g

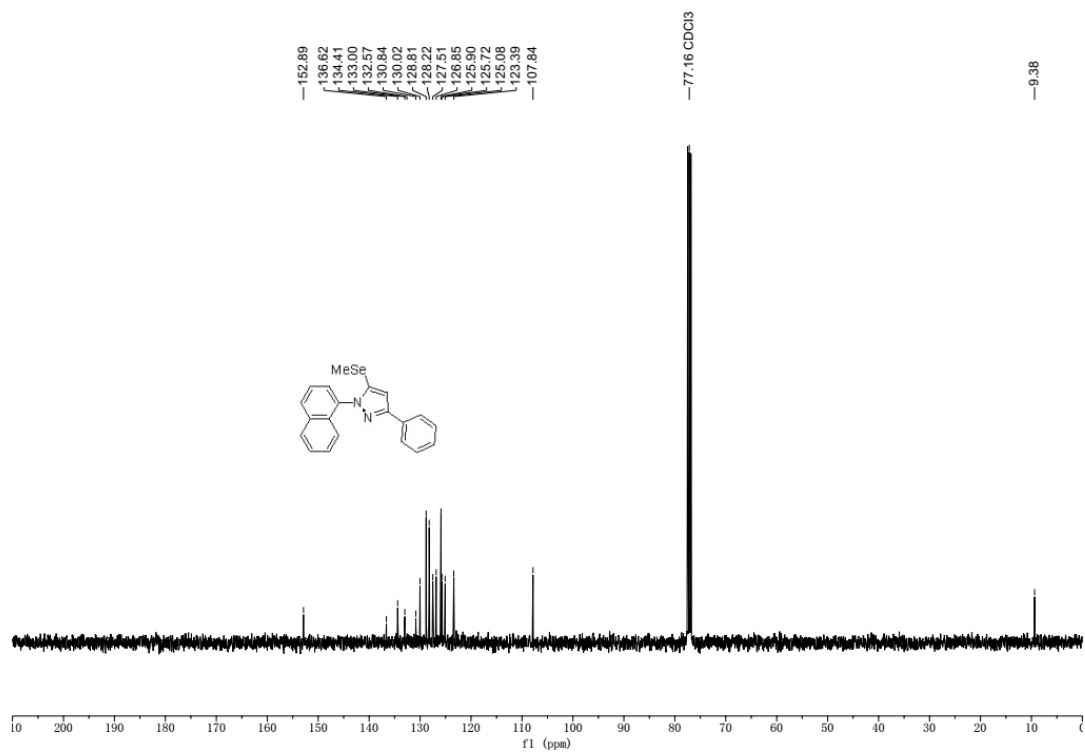

Figure S111.  $^{13}\text{C NMR}$  (100 MHz,  $\text{CDCl}_3$ ) spectrum of 5g

## 12. References

1. M. J. Frisch, G. W. Trucks, H. B. Schlegel et al., Gaussian 16 Revision. A.03, Gaussian Inc., Wallingford, CT, 2016.
2. L.-G. Xie, S. Niyomchon, A. J. Mota , L. González and N. Maulide, *Nat. Commun.*, 2016, **7**, 10914-10922.
3. C. J. Narangoda, T. R. Lex, M. A. Moore, C. D. McMillen, A. Kitaygorodskiy, J. E. Jackson and D. C. Whitehead, *Org. Lett.*, 2018, **20**, 8009-8013.
4. D. Leifert, F. Weidlich, F. Adler, C. G. Daniliuc, F. A. Alasmary and A. Studer *Org. Lett.*, 2022, **24**, 284-288.
5. S. K. Banjare, D. Leifert, F. Weidlich, C. G. Daniliuc, F. A. Alasmary and A. Studer, *Org. Lett.*, 2023, **25**, 6424-6428.
